# Supplementary material for: Projecting the clinical burden of chronic kidney disease at the patient level (Inside CKD): a microsimulation modelling study
Source: PubMed Central journal article supplement (PMC11247147; doi:10.1016/j.eclinm.2024.102614), 2024-05-02
Supplement: mmc1.pdf [file mmc1.pdf]

# Projecting the clinical burden of chronic kidney disease at the patient level (*Inside CKD*): a microsimulation modelling study

## Supplementary material

### Authors

Glenn M Chertow, Ricardo Correa-Rotter, Kai-Uwe Eckardt, Eiichiro Kanda, Avraham Karasik, Guisen Li, Christian Fynbo Christiansen, Panos Stafylas, Stephen G Holt, Ernst C Hagen, Juan Jose Garcia Sanchez, Salvatore Barone, Claudia Cabrera, Stephen Nolan, Timothy Coker, Laura Webber, Lise Retat

### Contents

|                                                                                                                                    |    |
|------------------------------------------------------------------------------------------------------------------------------------|----|
| Supplementary figures .....                                                                                                        | 2  |
| Figure S1a. Prevalence of diagnosed CKD cases per 100 000 of each population, by CKD stage in 2022.....                            | 2  |
| Figure S1b. Projected prevalence of diagnosed and undiagnosed cases of CKD at baseline (2022) per 100 000 of each population ..... | 3  |
| Figure S2. Prevalence of kidney replacement therapy by modality in 2022.....                                                       | 4  |
| Supplementary tables .....                                                                                                         | 5  |
| Table S1: The Inside CKD Scientific Steering Committee .....                                                                       | 5  |
| Table S2: Disease burden data inputs.....                                                                                          | 7  |
| Table S3: External validation of clinical burden of disease outputs .....                                                          | 38 |
| Table S4: Baseline percentage of drivers of CKD, and country/region income categories in 2022 ....                                 | 52 |
| Table S5: Overall prevalence of CKD in 2022 and 2027 expressed as the total number of cases.....                                   | 53 |
| Table S6: KRT prevalence per 100 000 (given for all modalities of treatment) in 2022 and 2027.....                                 | 57 |
| Supplementary data appendix 1: sensitivity analysis on diagnosis rates .....                                                       | 59 |
| Supplementary references.....                                                                                                      | 75 |
| Table S2 references .....                                                                                                          | 75 |
| Table S3 references .....                                                                                                          | 83 |

## Supplementary figures

Figure S1a. Prevalence of diagnosed CKD cases per 100 000 of each population, by CKD stage in 2022

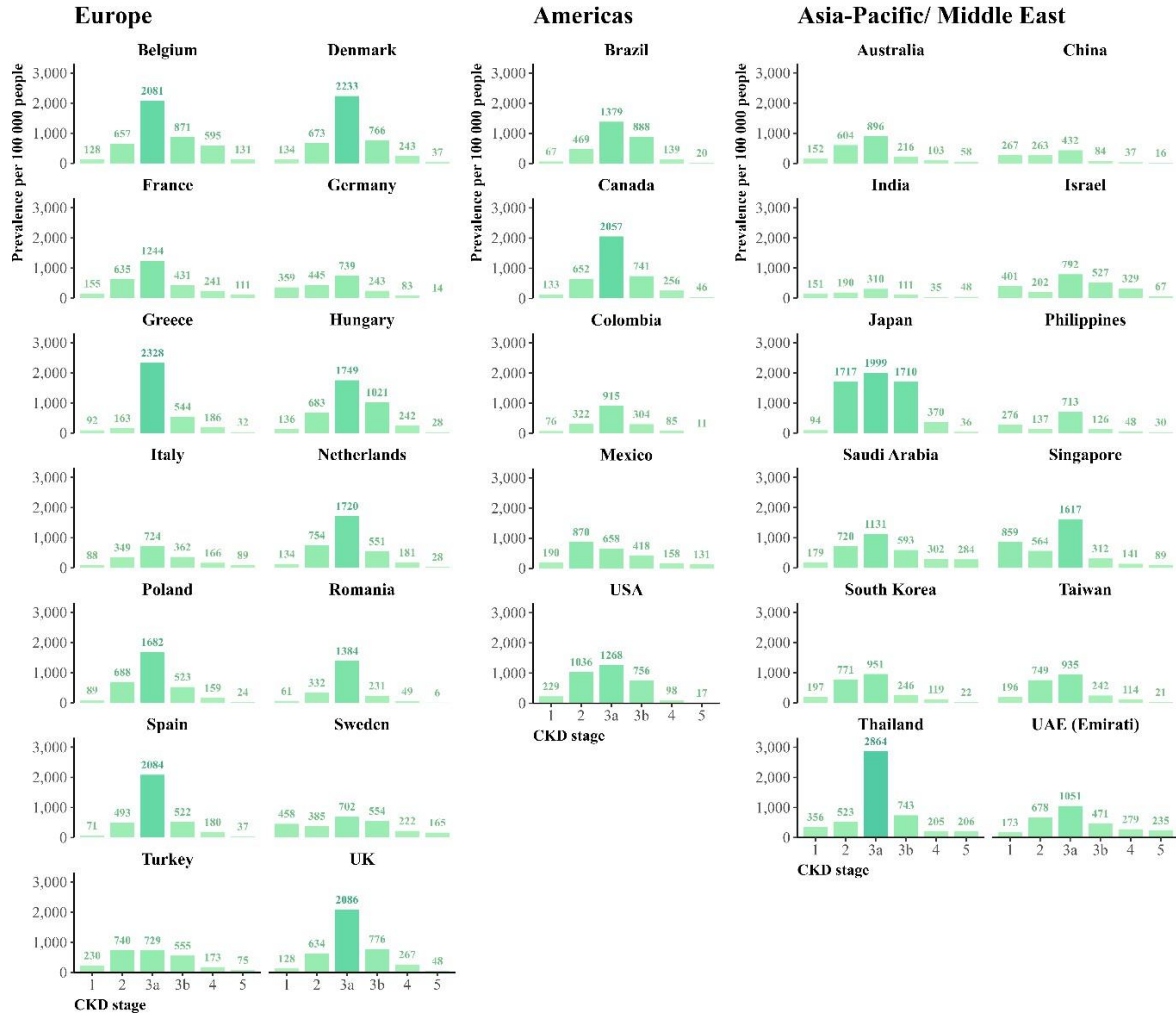

**Figure S1b. Projected prevalence of diagnosed and undiagnosed cases of CKD at baseline (2022) per 100 000 of each population**

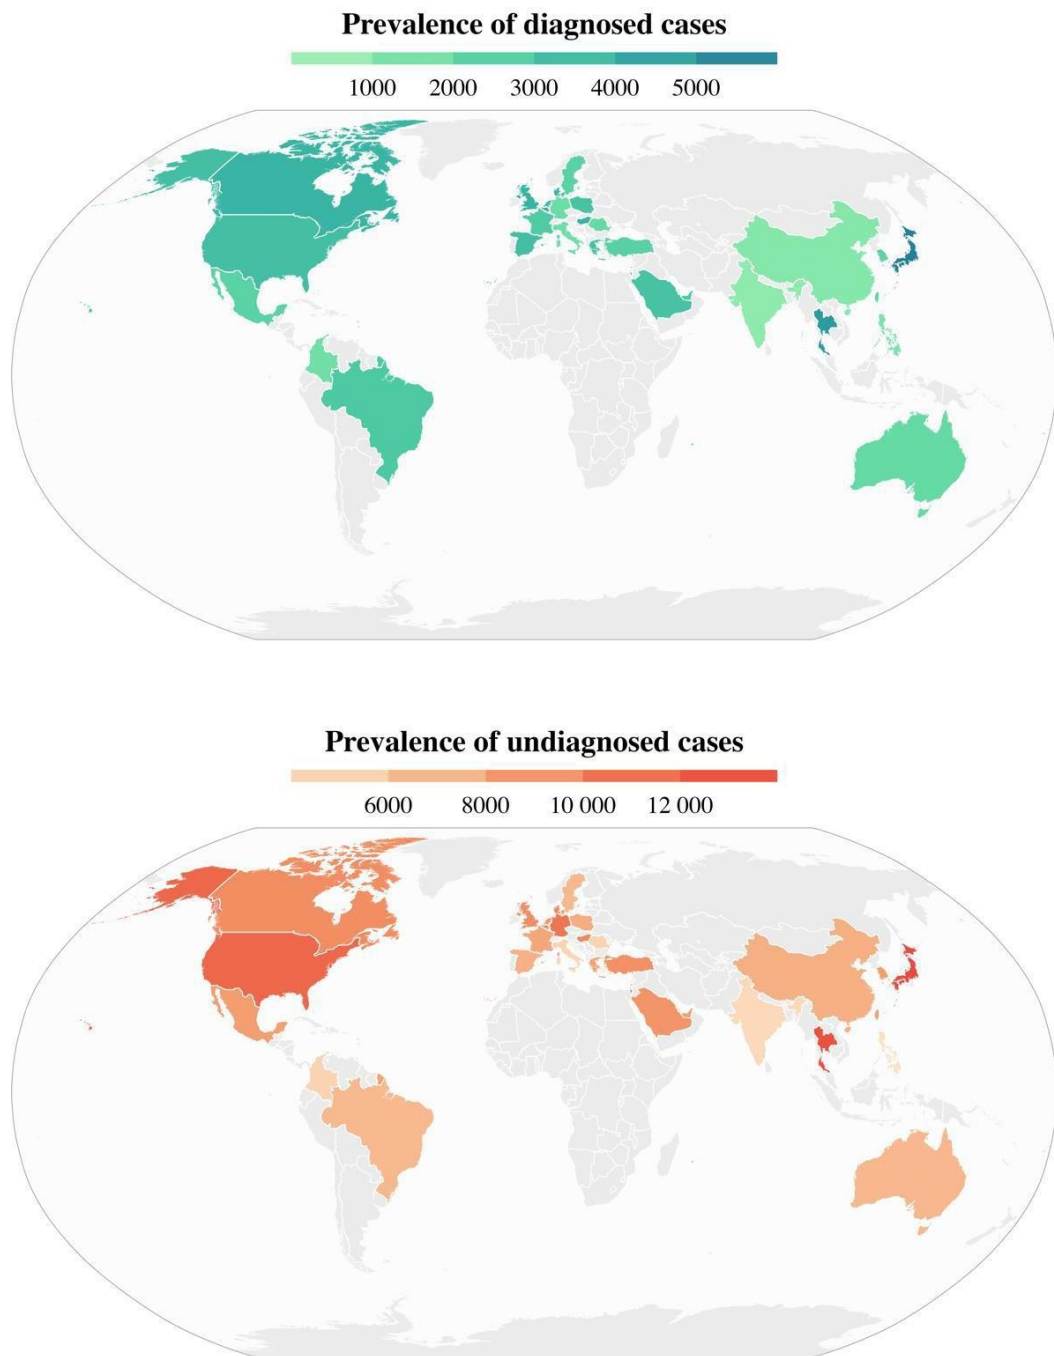

*CKD=chronic kidney disease. Notes: The UAE has a large and diverse Expatriate population with a different CKD profile; only the Emirati population has been provided here.*

Figure S2. Prevalence of kidney replacement therapy by modality in 2022

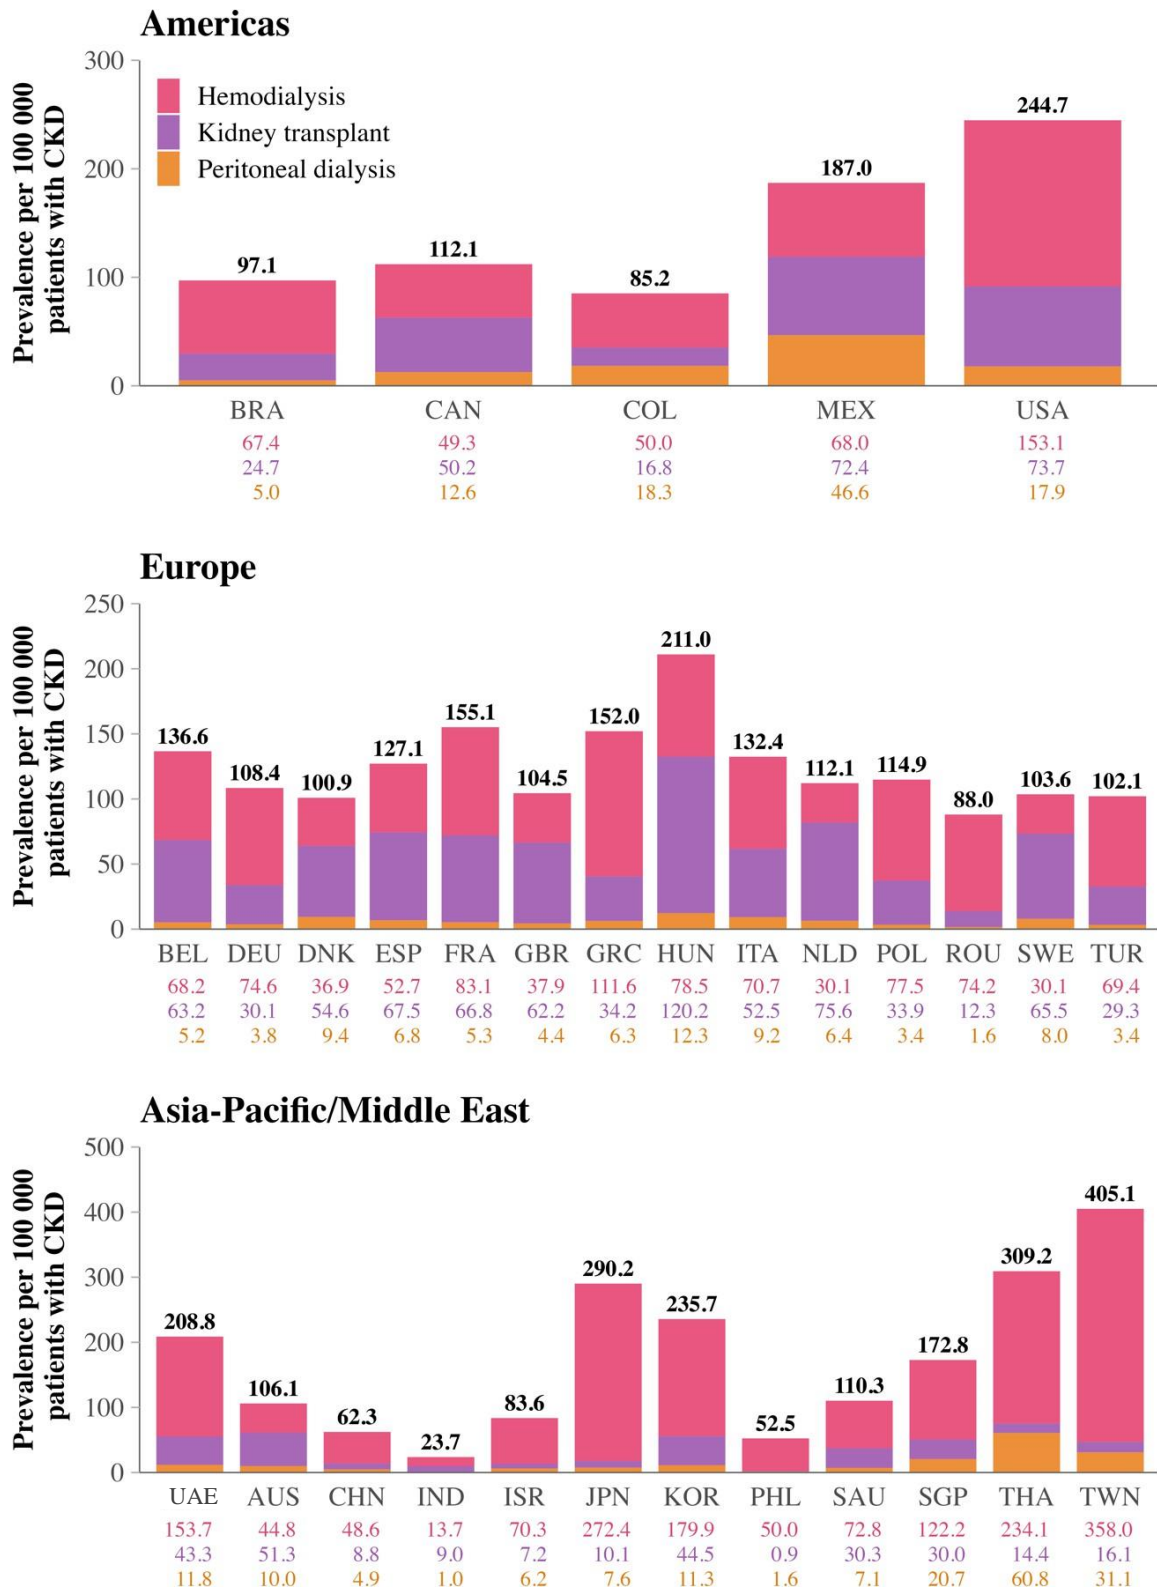

Notes: The UAE has a large and diverse Expatriate population with a different CKD profile; only the Emirati population has been shown here. Individual values have been rounded to one decimal place. Slight discrepancies may occur between the total sum reported as a result. CKD=chronic kidney disease.

## Supplementary tables

**Table S1: The Inside CKD Scientific Steering Committee**

| Region                               | Key external expert                      | Affiliation                                                                                                                                |
|--------------------------------------|------------------------------------------|--------------------------------------------------------------------------------------------------------------------------------------------|
| Australia                            | Prof. Steven Chadban                     | Royal Prince Alfred Hospital and University of Sydney, Camperdown, Australia                                                               |
| Belgium                              | Prof. Michel Jadoul                      | Cliniques Universitaires Saint-Luc, Université catholique de Louvain, Brussels, Belgium                                                    |
| Brazil                               | Prof. Marcelo Costa Batista              | Hospital Israelita Albert Einstein, São Paulo, Brazil                                                                                      |
| Canada                               | Dr Navdeep Tangri                        | University of Manitoba, Winnipeg, Canada                                                                                                   |
| China                                | Prof. Guisen Li                          | Sichuan Academy of Medical Sciences and Sichuan Provincial People's Hospital, Chengdu, China                                               |
| Colombia                             | Prof. José Javier Arango Álvarez         | Universidad del Quindío, Quindío, Colombia                                                                                                 |
| Denmark                              | Prof. Christian Fynbo Christiansen       | Aarhus University and Aarhus University Hospital, Aarhus, Denmark                                                                          |
| France                               | Prof. Jean-Michel Halimi                 | Service de néphrologie-HTA, dialyses et transplantation rénale, CHRU de Tours, Tours, France                                               |
| Germany                              | Prof. Kai-Uwe Eckardt                    | Charité Universitätsmedizin Berlin, Berlin, Germany                                                                                        |
| Greece                               | Dr Panos Stafylas                        | HealThink, Thessaloniki, Greece                                                                                                            |
| Hungary                              | Prof. István Wittmann, Dr Boglarka Laczy | University of Pécs, Pécs, Hungary                                                                                                          |
| India                                | Prof. Vivekanand Jha                     | The George Institute for Global Health India, New Delhi, India                                                                             |
| Israel                               | Prof. Avraham Karasik                    | Maccabi Institute for Research and Innovation, Tel Aviv, Israel                                                                            |
| Israel                               | Dr Gil Chernin                           | Kaplan Medical Center, Faculty of Medicine, Hebrew University of Jerusalem, Jerusalem, Israel                                              |
| Italy                                | Prof. Francesco Saverio Mennini          | Economic Evaluation and HTA-CEIS, Department of Economics and Finance, Faculty of Economics, University of Rome "Tor Vergata", Rome, Italy |
| Italy                                | Prof. Luca De Nicola                     | Department of Advanced Medical and Surgical Sciences, University of Campania Luigi Vanvitelli, Naples, Italy                               |
| Japan                                | Prof. Eiichiro Kanda                     | Kawasaki Medical School, Okayama, Japan                                                                                                    |
| Mexico                               | Prof. Ricardo Correa-Rotter              | Instituto Nacional de Ciencias Médicas y Nutrición Salvador Zubirán<br>Mexico City, Mexico                                                 |
| Netherlands                          | Dr Ernst C Hagen                         | Meander Medical Centre, Amersfoort, Netherlands                                                                                            |
| Philippines, Singapore, and Thailand | Assoc. Prof. Jason Choo Chon Jun         | Singapore General Hospital, Singapore                                                                                                      |
| Poland                               | Prof. Michał Nowicki                     | Warsaw University of Technology, Warsaw, Poland                                                                                            |
| Romania                              | Prof. Dr Ismail Gener                    | Fundeni Institute, Bucharest, Romania                                                                                                      |

|              |                                       |                                                                                                                                                                                                                                                                                                   |
|--------------|---------------------------------------|---------------------------------------------------------------------------------------------------------------------------------------------------------------------------------------------------------------------------------------------------------------------------------------------------|
| Saudi Arabia | Prof. Saeed M. G. Al-Ghamdi           | King Abdulaziz University Hospital and King Faisal Specialist Hospital and Research Centre, Jeddah, Saudi Arabia                                                                                                                                                                                  |
| South Korea  | Prof. Kook-Hwan Oh                    | Seoul National University College of Medicine, Seoul, South Korea                                                                                                                                                                                                                                 |
| Spain        | Prof. Juan Francisco Navarro-González | Research Unit and Nephrology Service, University Hospital Nuestra Señora de Candelaria, Santa Cruz de Tenerife, Spain                                                                                                                                                                             |
| Sweden       | Prof. Johan Åmlöv                     | Department of Neurobiology, Care Sciences and Society, Division of Family Medicine and Primary Care, Karolinska Institute, Stockholm, Sweden                                                                                                                                                      |
| Taiwan       | Prof. Mai-Szu Wu                      | Department of Internal Medicine, School of Medicine, College of Medicine, Taipei Medical University, Taipei City, Taiwan<br><br>Taipei Medical University Research Center of Urology and Kidney, Taipei City, Taiwan<br><br>Taipei Medical University Shuang Ho Hospital, New Taipei City, Taiwan |
| Türkiye      | Prof. Mustafa Arıcı                   | Division of Nephrology, Department of Internal Medicine, Hacettepe University, Ankara, Türkiye                                                                                                                                                                                                    |
| UAE          | Prof. Stephen G Holt                  | SEHA Kidney Care, Abu Dhabi, UAE                                                                                                                                                                                                                                                                  |
| UK           | Dr Albert Power                       | North Bristol NHS Trust, Southmead Hospital, Bristol, UK                                                                                                                                                                                                                                          |
| USA          | Prof. Glenn Chertow                   | Stanford University School of Medicine, Stanford, CA, USA                                                                                                                                                                                                                                         |
| USA          | Prof. Jay Wish                        | Indiana University School of Medicine, Indianapolis, IN, USA                                                                                                                                                                                                                                      |

CEIS=Centre for Economic and International Studies. CHRU=Centre Hospitalier Régional Universitaire.  
CKD=chronic kidney disease. HTA=health technology assessment. NHS=National Health Service.  
SEHA=Abu Dhabi Health Services Company.

**Table S2: Disease burden data inputs**

| Parameter                                  | Reference                                                 | Proxy country | Definitions                                                                                                  |
|--------------------------------------------|-----------------------------------------------------------|---------------|--------------------------------------------------------------------------------------------------------------|
| <b>Australia</b>                           |                                                           |               |                                                                                                              |
| eGFR                                       | Australian Health Survey 2011–12 [1]                      | -             | Distribution of eGFR and albuminuria in individuals aged $\geq 18$ (cohort of 17 042) with each stage of CKD |
| Albuminuria                                |                                                           |               |                                                                                                              |
| <b>KRT parameters</b>                      |                                                           |               |                                                                                                              |
| KRT initiation threshold                   | Prof. Steven Chadban, personal communication              | -             |                                                                                                              |
| Chance of being treated                    | Sparke et al., 2013 [2]                                   | -             |                                                                                                              |
| Peritoneal dialysis                        | ANZDATA 43rd Annual Report, 2020 [3]                      | -             | Incidence and prevalence of patients receiving KRT who are undergoing peritoneal dialysis and haemodialysis  |
| Haemodialysis                              |                                                           |               | Prevalence of KRT by year                                                                                    |
| Transplantation                            |                                                           |               | Transplantation failure per year                                                                             |
| <b>Comorbidities of CKD</b>                |                                                           |               |                                                                                                              |
| Type 2 diabetes                            | HSE, 2016 [4]                                             | UK            | Categorized by albuminuria level                                                                             |
| Hypertension                               |                                                           |               |                                                                                                              |
| <b>Cardiovascular complications of CKD</b> |                                                           |               |                                                                                                              |
| Heart failure                              | British Heart Foundation, 2020 [5]                        | UK            | Incidence                                                                                                    |
|                                            | Calculated from Barendregt et al., 2003 [6]               | -             | Prevalence                                                                                                   |
|                                            | USRDS, 2009 [7]                                           | USA           | Relative risk                                                                                                |
| Myocardial infarction                      | Australian Bureau of Statistics, 2018 [8]                 | -             | Prevalence (incidence calculated)                                                                            |
|                                            | USRDS, 2009 [7]                                           | USA           | Relative risk                                                                                                |
| Stroke                                     | Stroke Foundation and Deloitte Access Economics, 2020 [9] | -             | Incidence and prevalence                                                                                     |
|                                            | Masson et al., 2015 [10]                                  | -             | Relative risk                                                                                                |
| <b>Mortality</b>                           |                                                           |               |                                                                                                              |
| Mortality by CKD stage                     | UN, World Population Prospects, 2019 [11, 12]             | -             | Total number of deaths by age and sex                                                                        |
|                                            | Levey et al., 2011 [13]                                   | -             | Probability of dying from any cause by CKD stage                                                             |
| <b>Diagnosis rates</b>                     |                                                           |               |                                                                                                              |
| Diagnosis rates by stage                   | Hirst et al., 2020 [14]                                   | UK            | Average calculated from both inputs                                                                          |
|                                            | HSE, 2016 [4]                                             | UK            |                                                                                                              |
| <b>Belgium</b>                             |                                                           |               |                                                                                                              |
| eGFR                                       | HSE, 2016 [4]                                             | UK            | eGFR by age category, disaggregated based on [4]                                                             |
|                                            | Van Pottelbergh et al., 2012 [15]                         | -             |                                                                                                              |

|                                            |                                                                                      |     |                                                                                                                                                                                      |
|--------------------------------------------|--------------------------------------------------------------------------------------|-----|--------------------------------------------------------------------------------------------------------------------------------------------------------------------------------------|
| Albuminuria                                | HSE, 2016 [4]                                                                        | UK  | AER by age category                                                                                                                                                                  |
| <b>KRT parameters</b>                      |                                                                                      |     |                                                                                                                                                                                      |
| KRT initiation threshold                   | Prof. Michel Jadoul, personal communication                                          | -   | Patients undergoing peritoneal dialysis or haemodialysis<br><br>Prevalence of KRT by year, and transplantation rate per dialysis patient-year<br><br>Risk of transplantation failure |
| Chance of being treated                    | O'Callaghan et al., 2011 [16]                                                        | UK  |                                                                                                                                                                                      |
| Peritoneal dialysis                        | Cleemput et al., 2010 [17]                                                           | -   |                                                                                                                                                                                      |
| Haemodialysis                              | Jaarrapport, 2019 [18]                                                               | -   |                                                                                                                                                                                      |
| Transplantation                            | UK Renal Registry (p91) [19]                                                         | UK  |                                                                                                                                                                                      |
| <b>Comorbidities of CKD</b>                |                                                                                      |     |                                                                                                                                                                                      |
| Type 2 diabetes                            | HSE, 2016 [4]                                                                        | UK  | Categorized by albuminuria level                                                                                                                                                     |
| Hypertension                               | HSE, 2016 [4]                                                                        | UK  |                                                                                                                                                                                      |
|                                            | Barzilay et al., 2018 [20]                                                           | UK  |                                                                                                                                                                                      |
| <b>Cardiovascular complications of CKD</b> |                                                                                      |     |                                                                                                                                                                                      |
| Heart failure                              | Devroey et al., 2010 [21]                                                            | -   | Incidence                                                                                                                                                                            |
|                                            | Smeets et al., 2019 [22]                                                             | -   | Prevalence                                                                                                                                                                           |
|                                            | USRDS, 2009 [7]                                                                      | USA | Relative risk                                                                                                                                                                        |
| Myocardial infarction                      | Belgian Federal Public Service: Health, Food Chain Safety and Environment, 2016 [23] | -   | Incidence                                                                                                                                                                            |
|                                            | Moran et al., 2012 [24]                                                              | -   | Prevalence                                                                                                                                                                           |
|                                            | USRDS, 2009 [7]                                                                      | USA | Relative risk                                                                                                                                                                        |
| Stroke                                     | IHME Global Burden of Diseases, 2019 [25]                                            | -   | Incidence and prevalence                                                                                                                                                             |
|                                            | Masson et al., 2015 [10]                                                             | -   | Relative risk                                                                                                                                                                        |
| <b>Mortality</b>                           |                                                                                      |     |                                                                                                                                                                                      |
| Mortality by CKD stage                     | UN, World Population Prospects, 2019 [11, 12]                                        | -   | Total number of deaths by age and sex                                                                                                                                                |
|                                            | Levey et al., 2011 [13]                                                              | -   | Probability of dying from any cause by CKD stage                                                                                                                                     |
| <b>Diagnosis rates</b>                     |                                                                                      |     |                                                                                                                                                                                      |
| Diagnosis rates by stage                   | Hirst et al., 2020 [14]                                                              | UK  | Average calculated from both inputs                                                                                                                                                  |
|                                            | HSE, 2016 [4]                                                                        | UK  |                                                                                                                                                                                      |
| <b>Brazil</b>                              |                                                                                      |     |                                                                                                                                                                                      |
| eGFR                                       | Piccolli et al., 2017 [26]                                                           | -   | Categorical eGFR data for both sexes combined, for three age groups (18–29 years, 30–59 years, and ≥60 years). Redistributed based on [4]                                            |



|                                            |                                                                               |       |                                                                    |
|--------------------------------------------|-------------------------------------------------------------------------------|-------|--------------------------------------------------------------------|
| Albuminuria                                | Piccolli et al., 2017 [26]                                                    | -     | Categorical albuminuria data by sex and albuminuria stage combined |
| <b>KRT parameters</b>                      |                                                                               |       |                                                                    |
| KRT initiation threshold                   | Pyart et al., 2020 [27]                                                       | UK    |                                                                    |
| Chance of being treated                    | Organización Nacional de Trasplantes, 2018 [28]                               | Spain |                                                                    |
| Peritoneal dialysis                        | Machado et al., 2011 [29]                                                     | -     | Incident peritoneal dialysis or haemodialysis                      |
|                                            | Brazilian Dialysis Registry [30] (not publicly accessible)                    | -     | Prevalent peritoneal dialysis or haemodialysis                     |
| Haemodialysis                              | Organización Nacional de Trasplantes, 2018 [28]                               | -     | Prevalence of KRT by modality                                      |
|                                            | Neves et al., 2021 [31]                                                       | Spain | Calculated transplantation rate per 100 dialysis patients per year |
| Transplantation                            | Oliveira et al., 2005 [32]                                                    | -     | Risk of transplantation failure                                    |
| <b>Comorbidities of CKD</b>                |                                                                               |       |                                                                    |
| Type 2 diabetes                            | Ruiz-Hurtado et al., 2016 [33]                                                | Spain | Categorized by albuminuria level                                   |
| Hypertension                               |                                                                               |       |                                                                    |
| <b>Cardiovascular complications of CKD</b> |                                                                               |       |                                                                    |
| Heart failure                              | Fernández-Gassó et al., 2019 [34]                                             | Spain | Incidence                                                          |
|                                            | Oliveira et al., 2020 [35]                                                    | -     | Prevalence                                                         |
|                                            | USRDS, 2009 [7]                                                               | USA   | Relative risk                                                      |
| Myocardial infarction                      | Forcadell et al., 2018 [36]                                                   | Spain | Incidence (prevalence calculated)                                  |
|                                            | USRDS, 2009 [7]                                                               | USA   | Relative risk                                                      |
| Stroke                                     | Vega et al., 2009 [37]                                                        | Spain | Incidence (prevalence calculated)                                  |
|                                            | Masson et al., 2015 [10]                                                      | -     | Relative risk                                                      |
| <b>Mortality</b>                           |                                                                               |       |                                                                    |
| Mortality by CKD stage                     | UN, World Population Prospects, 2019 [11, 12]                                 | -     | Total number of deaths by age and sex                              |
|                                            | Levey et al., 2011 [13]                                                       | -     | Probability of dying from any cause by CKD stage                   |
| <b>Diagnosis rates</b>                     |                                                                               |       |                                                                    |
| Diagnosis rates by stage                   | Hirst et al., 2020 [14]                                                       | UK    | Stages 1 and 2                                                     |
|                                            | Average from TriNetX and LCED database analysis by AstraZeneca (data on file) | USA   | Stages 3a and 3b                                                   |
|                                            | Bakris et al., 2020 [38]                                                      | USA   | Stages 4 and 5                                                     |

| <b>Canada</b>                              |                                                         |       |                                                                                       |
|--------------------------------------------|---------------------------------------------------------|-------|---------------------------------------------------------------------------------------|
| eGFR                                       | HSE, 2016 [4]                                           | UK    | Percentage distribution of eGFR and albuminuria by age/sex                            |
| Albuminuria                                |                                                         |       |                                                                                       |
| <b>KRT parameters</b>                      |                                                         |       |                                                                                       |
| KRT initiation threshold                   | Dr Navdeep Tangri, personal communication               | -     | Renal replacement therapy model in Canada                                             |
| Chance of being treated                    | O'Callaghan et al., 2011 [16]                           | UK    |                                                                                       |
| Peritoneal dialysis                        | Canadian Institute for Health Information, 2018 [39]    | -     |                                                                                       |
| Haemodialysis                              | USRDS, 2021 [40]                                        | -     | Transplantation rate per dialysis patient-year                                        |
| Transplantation                            | Pyart et al., 2020 [27]                                 | -     | Risk of transplantation failure                                                       |
| <b>Comorbidities of CKD</b>                |                                                         |       |                                                                                       |
| Type 2 diabetes                            | Armstrong et al., 2019 [41]                             | -     | Proportion of patients with CKD, categorized by albuminuria level                     |
| Hypertension                               | NHANES, 2018 [42]                                       | -     |                                                                                       |
| <b>Cardiovascular complications of CKD</b> |                                                         |       |                                                                                       |
| Heart failure                              | Canadian Chronic Disease Surveillance System, 2016 [43] | -     | Incidence and prevalence                                                              |
|                                            | USRDS, 2009 [7]                                         | USA   | Relative risk                                                                         |
| Myocardial infarction                      | Canadian Chronic Disease Surveillance System, 2016 [43] | -     | Incidence and prevalence                                                              |
|                                            | USRDS, 2009 [7]                                         | USA   | Relative risk                                                                         |
| Stroke                                     | Canadian Chronic Disease Surveillance System, 2016 [43] | -     | Incidence and prevalence                                                              |
|                                            | Masson et al., 2015 [10]                                | USA   | Relative risk                                                                         |
| <b>Mortality</b>                           |                                                         |       |                                                                                       |
| Mortality by CKD stage                     | UN, World Population Prospects, 2019 [11, 12]           | -     | Probability of dying from any cause by CKD stage                                      |
|                                            | Levey et al., 2011 [13]                                 | -     |                                                                                       |
| <b>Diagnosis rates</b>                     |                                                         |       |                                                                                       |
| Diagnosis rates by stage                   | Hirst et al., 2020 [14]                                 | UK    | Average calculated from both inputs                                                   |
|                                            | HSE, 2016 [4]                                           | UK    |                                                                                       |
| <b>China</b>                               |                                                         |       |                                                                                       |
| eGFR                                       | Zhang et al., 2012 [44]                                 | -     | Categorical eGFR data for adults, distributed by age/sex (disaggregated based on [4]) |
| Albuminuria                                | Japanese Society of Nephrology, 2012 [45]               | Japan | Categorical albuminuria data for both sexes, by age (disaggregated based on [4])      |
| <b>KRT parameters</b>                      |                                                         |       |                                                                                       |
| KRT initiation threshold                   | Watanabe et al., 2015 [46]                              | Japan |                                                                                       |

|                                            |                                                 |       |                                                                                                             |
|--------------------------------------------|-------------------------------------------------|-------|-------------------------------------------------------------------------------------------------------------|
| Chance of being treated                    | Zhang et al., 2019 [47]                         | -     |                                                                                                             |
| Peritoneal dialysis                        | Zhang et al., 2019 [47]                         | -     | Prevalence of KRT by year                                                                                   |
|                                            | Chinese National Renal Data System [48]         | -     | Incidence of peritoneal dialysis and haemodialysis                                                          |
| Haemodialysis                              | Sun et al., 2016 [49]                           | -     | Prevalence of peritoneal dialysis and haemodialysis                                                         |
|                                            | Chinese National Renal Data System [48]         | -     | Transplantation rate per dialysis patient-year                                                              |
| Transplantation                            | Xue et al., 2017 [50]                           | -     | Risk of transplantation failure                                                                             |
| <b>Comorbidities of CKD</b>                |                                                 |       |                                                                                                             |
| Type 2 diabetes                            | HSE, 2016 [4]                                   | UK    | Prevalence of type 2 diabetes and hypertension in the CKD population, by albuminuria level                  |
| Hypertension                               | Barzilay et al., 2018 [20]                      | UK    |                                                                                                             |
|                                            | HSE, 2016 [4]                                   | UK    |                                                                                                             |
| <b>Cardiovascular complications of CKD</b> |                                                 |       |                                                                                                             |
| Heart failure                              | Sun et al., 2009 [51]                           | -     | Prevalence (incidence calculated)                                                                           |
|                                            | USRDS, 2009 [7]                                 | USA   | Relative risk                                                                                               |
| Myocardial infarction                      | Japanese-language paper [52]                    | Japan | Incidence (prevalence calculated)                                                                           |
|                                            | USRDS, 2009 [7]                                 | USA   | Relative risk                                                                                               |
| Stroke                                     | IHME, Global Burden of Diseases, 2019 [25]      | -     | Prevalence and incidence                                                                                    |
|                                            | Masson et al., 2015 [10]                        | -     | Relative risk                                                                                               |
| <b>Mortality</b>                           |                                                 |       |                                                                                                             |
| Mortality by CKD stage                     | UN, World Population Prospects, 2019 [11, 12]   | -     | Total number of deaths by age and sex                                                                       |
|                                            | Levey et al., 2011 [13]                         |       | Probability of dying from any cause by CKD stage                                                            |
| <b>Diagnosis rates</b>                     |                                                 |       |                                                                                                             |
| Diagnosis rates by stage                   | Hirst et al., 2020 [14]                         | UK    | Average calculated from both inputs                                                                         |
|                                            | HSE, 2016 [4]                                   | UK    |                                                                                                             |
| <b>Colombia</b>                            |                                                 |       |                                                                                                             |
| eGFR                                       | Otero et al., 2010 [53]                         | Spain | eGFR stages redistributed by UK data                                                                        |
| Albuminuria                                | Gorostidi et al., 2018 [54]                     | Spain |                                                                                                             |
| <b>KRT parameters</b>                      |                                                 |       |                                                                                                             |
| KRT initiation threshold                   | Dr Albert Power, personal communication         | UK    |                                                                                                             |
| Chance of being treated                    | O'Callaghan et al., 2011 [16]                   | UK    |                                                                                                             |
| Peritoneal dialysis                        | Calculated from Cuenta de Alto Costo, 2021 [55] | -     | Incidence and prevalence of patients receiving KRT who are undergoing peritoneal dialysis and haemodialysis |

|                                            |                                                                               |        |                                                              |
|--------------------------------------------|-------------------------------------------------------------------------------|--------|--------------------------------------------------------------|
| Haemodialysis                              | Cuenta de Alto Costo, 2021 [55]<br>Urrego et al., 2022 [56]                   | -<br>- | Prevalence of KRT by year<br>Transplantation number per year |
| Transplantation                            | Estupiñán-Bohórquez et al., 2021 [57]                                         | -      | Annual risk of transplantation failure                       |
| <b>Comorbidities of CKD</b>                |                                                                               |        |                                                              |
| Type 2 diabetes                            | Ruiz-Hurtado et al., 2016 [33]                                                | Spain  | Categorized by albuminuria level                             |
| Hypertension                               |                                                                               |        |                                                              |
| <b>Cardiovascular complications of CKD</b> |                                                                               |        |                                                              |
| Heart failure                              | Gómez, 2016 [58]                                                              | -      | Incidence                                                    |
|                                            | SISPRO [59]                                                                   | -      | Distribution by age and sex                                  |
|                                            | Gómez-Mesa et al., 2021 [60]                                                  | -      | Prevalence                                                   |
|                                            | SISPRO [59]                                                                   | -      | Distribution by age and sex                                  |
|                                            | USRDS, 2009 [7]                                                               | USA    | Relative risk                                                |
| Myocardial infarction                      | Canadian Chronic Disease Surveillance System, 2016 [43]                       | Canada | Incidence                                                    |
|                                            | Bedoya-Rios et al., 2016 [61]                                                 | -      | Prevalence                                                   |
|                                            | SISPRO [59]                                                                   | -      | Distribution by age and sex                                  |
|                                            | USRDS, 2009 [7]                                                               | USA    | Relative risk                                                |
| Stroke                                     | SISPRO and Congreso de la República Colombiana, 2021 [59]                     | -      | Incidence                                                    |
|                                            | El Hospital, 2018 [62]                                                        | -      | Prevalence                                                   |
|                                            | SISPRO [58]                                                                   | -      | Distribution by age and sex                                  |
|                                            | Masson et al., 2015 [10]                                                      | -      | Relative risk                                                |
| <b>Mortality</b>                           |                                                                               |        |                                                              |
| Mortality by CKD stage                     | UN, World Population Prospects, 2019 [11, 12]                                 | -      | Total number of deaths by age and sex                        |
|                                            | Levey et al., 2011 [13]                                                       | -      | Probability of dying from any cause by CKD stage             |
| <b>Diagnosis rates</b>                     |                                                                               |        |                                                              |
| Diagnosis rates by stage                   | Hirst et al., 2020 [14]                                                       | UK     | Stages 1 and 2                                               |
|                                            | Average from TriNetX and LCED database analysis by AstraZeneca (data on file) | USA    | Stages 3a and 3b                                             |
|                                            | Bakris et al., 2020 [38]                                                      | USA    | Stages 4 and 5                                               |
| <b>Denmark</b>                             |                                                                               |        |                                                              |
| eGFR                                       | HSE, 2016 [4]                                                                 | UK     | eGFR and AER by age                                          |
| Albuminuria                                |                                                                               |        |                                                              |
| <b>KRT parameters</b>                      |                                                                               |        |                                                              |
| KRT initiation threshold                   | Danish Society of Nephrology, 2015 [63]                                       | -      |                                                              |

|                                            |                                                           |     |                                                                                                             |
|--------------------------------------------|-----------------------------------------------------------|-----|-------------------------------------------------------------------------------------------------------------|
| Chance of being treated                    | Danish Nephrological Society National Register, 2020 [64] | -   |                                                                                                             |
| Peritoneal dialysis                        | Danish Nephrological Society National Register, 2020 [64] | -   | Incidence and prevalence of patients receiving KRT who are undergoing peritoneal dialysis and haemodialysis |
| Haemodialysis                              |                                                           |     | Prevalence of KRT by year                                                                                   |
| Transplantation                            | Sundhend, 2019 [65]                                       | -   | Transplantation rate per 100 dialysis patients per year<br>Annual risk of transplantation failure           |
| <b>Comorbidities of CKD</b>                |                                                           |     |                                                                                                             |
| Type 2 diabetes                            | HSE, 2016 [4]                                             | UK  | Prevalence of type 2 diabetes and hypertension in the CKD population, by albuminuria level                  |
| Hypertension                               | Barzilay et al., 2018 [20]                                | UK  |                                                                                                             |
|                                            | HSE, 2016 [4]                                             | UK  |                                                                                                             |
| <b>Cardiovascular complications of CKD</b> |                                                           |     |                                                                                                             |
| Heart failure                              | Hjerte foreningen, 2018 [66]                              | -   | Incidence                                                                                                   |
|                                            | Hjerte foreningen, 2018 [67]                              | -   | Prevalence                                                                                                  |
|                                            | USRDS, 2009 [7]                                           | USA | Relative risk                                                                                               |
| Myocardial infarction                      | Hjerte foreningen, 2018 [68]                              | -   | Incidence                                                                                                   |
|                                            | Hjerte foreningen, 2018 [67]                              | -   | Prevalence                                                                                                  |
|                                            | USRDS, 2009 [7]                                           | USA | Relative risk                                                                                               |
| Stroke                                     | Hjerte foreningen, 2018 [69]                              | -   | Incidence                                                                                                   |
|                                            | Hjerte foreningen, 2018 [70]                              | -   | Prevalence                                                                                                  |
|                                            | Masson et al., 2015 [10]                                  | -   | Relative risk                                                                                               |
| <b>Mortality</b>                           |                                                           |     |                                                                                                             |
| Mortality by CKD stage                     | UN, World Population Prospects, 2019 [11, 12]             | -   | Total number of deaths by age and sex                                                                       |
|                                            | Levey et al., 2011 [13]                                   | -   | Probability of dying from any cause by CKD stage                                                            |
| <b>Diagnosis rates</b>                     |                                                           |     |                                                                                                             |
| Diagnosis rates by stage                   | Hirst et al., 2020 [14]                                   | UK  | Average calculated from both inputs                                                                         |
|                                            | HSE, 2016 [4]                                             | UK  |                                                                                                             |
| <b>France</b>                              |                                                           |     |                                                                                                             |
| eGFR                                       | HSE, 2016 [4]                                             | UK  | eGFR stages by 5-year age categories                                                                        |
| Albuminuria                                | HSE, 2016 [4]                                             | UK  | AER stages by 5-year age categories                                                                         |
| <b>KRT parameters</b>                      |                                                           |     |                                                                                                             |
| KRT initiation threshold                   | Pyart et al., 2020 [27]                                   | UK  |                                                                                                             |
| Chance of being treated                    | REIN report, 2018 [71]                                    | -   |                                                                                                             |

|                                            |                                               |     |                                                                                                                                                                                                                                                           |
|--------------------------------------------|-----------------------------------------------|-----|-----------------------------------------------------------------------------------------------------------------------------------------------------------------------------------------------------------------------------------------------------------|
| Peritoneal dialysis                        | REIN report, 2018 [71]                        | -   | Incidence and prevalence of patients receiving KRT who are undergoing peritoneal dialysis and haemodialysis<br><br>Prevalence of KRT by year<br><br>Transplantation rate per 100 dialysis patients per year<br><br>Annual risk of transplantation failure |
| Haemodialysis                              |                                               |     |                                                                                                                                                                                                                                                           |
| Transplantation                            |                                               |     |                                                                                                                                                                                                                                                           |
| <b>Comorbidities of CKD</b>                |                                               |     |                                                                                                                                                                                                                                                           |
| Type 2 diabetes                            | HSE, 2016 [4]                                 | UK  | Prevalence of type 2 diabetes and hypertension in the CKD population, by albuminuria level                                                                                                                                                                |
| Hypertension                               |                                               |     |                                                                                                                                                                                                                                                           |
| <b>Cardiovascular complications of CKD</b> |                                               |     |                                                                                                                                                                                                                                                           |
| Heart failure                              | Analysis of THIN, 2019 (data on file)         | -   | Incidence and prevalence                                                                                                                                                                                                                                  |
|                                            | USRDS, 2009 [7]                               | USA | Relative risk                                                                                                                                                                                                                                             |
| Myocardial infarction                      | Analysis of THIN, 2019 (data on file)         | -   | Incidence and prevalence                                                                                                                                                                                                                                  |
|                                            | USRDS, 2009 [7]                               | USA | Relative risk                                                                                                                                                                                                                                             |
| Stroke                                     | Analysis of THIN, 2019 (data on file)         | -   | Incidence and prevalence                                                                                                                                                                                                                                  |
|                                            | Masson et al., 2015 [10]                      | -   | Relative risk                                                                                                                                                                                                                                             |
| <b>Mortality</b>                           |                                               |     |                                                                                                                                                                                                                                                           |
| Mortality by CKD stage                     | UN, World Population Prospects, 2019 [11, 12] | -   | Total number of deaths by age and sex                                                                                                                                                                                                                     |
|                                            | Levey et al., 2011 [13]                       | -   | Probability of dying from any cause by CKD stage                                                                                                                                                                                                          |
| <b>Diagnosis rates</b>                     |                                               |     |                                                                                                                                                                                                                                                           |
| Diagnosis rates by stage                   | Hirst et al., 2020 [14]                       | UK  | Average calculated from both inputs                                                                                                                                                                                                                       |
|                                            | HSE, 2016 [4]                                 | UK  |                                                                                                                                                                                                                                                           |
| <b>Germany</b>                             |                                               |     |                                                                                                                                                                                                                                                           |
| eGFR                                       | Girndt et al., 2016 [72]                      | -   | eGFR by age category, disaggregated based on [5]                                                                                                                                                                                                          |
| Albuminuria                                |                                               |     |                                                                                                                                                                                                                                                           |
| <b>KRT parameters</b>                      |                                               |     |                                                                                                                                                                                                                                                           |
| KRT initiation threshold                   | Wanner et al., 2003 [73]                      | -   |                                                                                                                                                                                                                                                           |
| Chance of being treated                    | Frei et al., 2008 [74]                        | -   |                                                                                                                                                                                                                                                           |
| Peritoneal dialysis                        | Frei et al., 2008 [74]                        | -   | Incidence and prevalence of patients receiving KRT who were undergoing peritoneal dialysis and haemodialysis                                                                                                                                              |
| Haemodialysis                              |                                               |     |                                                                                                                                                                                                                                                           |
| Transplantation                            | Satayathum et al., 2005 [75]                  | -   | Rate per 100 dialysis patients per year                                                                                                                                                                                                                   |

|                                            |                                               |       |                                                                                                             |
|--------------------------------------------|-----------------------------------------------|-------|-------------------------------------------------------------------------------------------------------------|
|                                            | Frei et al., 2008 [74]                        | -     | Risk of transplantation failure                                                                             |
| <b>Comorbidities of CKD</b>                |                                               |       |                                                                                                             |
| Type 2 diabetes                            | HSE, 2016 [4]                                 | UK    | Prevalence of type 2 diabetes and hypertension in the CKD population, by albuminuria level                  |
| Hypertension                               | Barzilay et al., 2018 [20]                    | UK    |                                                                                                             |
|                                            | HSE, 2016 [4]                                 | UK    |                                                                                                             |
| <b>Cardiovascular complications of CKD</b> |                                               |       |                                                                                                             |
| Heart failure                              | GBE Federation, 2021 [76]                     | -     | Incidence calculated from prevalence                                                                        |
|                                            | USRDS, 2009 [7]                               | USA   | Relative risk                                                                                               |
| Myocardial infarction                      | GBE Federation, 2021 [76]                     | -     | Incidence calculated from prevalence                                                                        |
|                                            | USRDS, 2009 [7]                               | USA   | Relative risk                                                                                               |
| Stroke                                     | GBE Federation, 2021 [76]                     | -     | Incidence calculated from prevalence                                                                        |
|                                            | Masson et al., 2015 [10]                      | -     | Relative risk                                                                                               |
| <b>Mortality</b>                           |                                               |       |                                                                                                             |
| Mortality by CKD stage                     | UN, World Population Prospects, 2019 [11, 12] | -     | Total number of deaths by age and sex                                                                       |
|                                            | Levey et al., 2011 [13]                       | -     | Probability of dying from any cause by CKD stage                                                            |
| <b>Diagnosis rates</b>                     |                                               |       |                                                                                                             |
| Diagnosis rates by stage                   | Hirst et al., 2020 [14]                       | UK    | Average calculated from both inputs                                                                         |
|                                            | HSE, 2016 [4]                                 | UK    |                                                                                                             |
| <b>Greece</b>                              |                                               |       |                                                                                                             |
| eGFR                                       | Otero et al., 2010 [53]                       | Spain | eGFR by age category, redistributed based on UK data                                                        |
| Albuminuria                                | Gorostidi et al., 2018 [54]                   | Spain | UACR by age category, redistributed based on UK data                                                        |
| <b>KRT parameters</b>                      |                                               |       |                                                                                                             |
| KRT initiation threshold                   | Pyart et al., 2020 [27]                       | UK    |                                                                                                             |
| Chance of being treated                    | ERA-EDTA Registry, 2019 [77]                  | -     |                                                                                                             |
| Peritoneal dialysis                        | ERA-EDTA Registry, 2019 [77]                  | -     | Incidence and prevalence of patients receiving KRT who are undergoing peritoneal dialysis and haemodialysis |
| Haemodialysis                              |                                               |       | Prevalence of KRT by year<br>Transplantation rate per 100 dialysis patient-years                            |

|                                            |                                                                 |        |                                                                                            |
|--------------------------------------------|-----------------------------------------------------------------|--------|--------------------------------------------------------------------------------------------|
| Transplantation                            | Grandaliano, 2020 [78]                                          | Italy  | Annual risk of transplantation failure (calculated from 10-year failure rate of 40%)       |
| <b>Comorbidities of CKD</b>                |                                                                 |        |                                                                                            |
| Type 2 diabetes                            | HSE, 2016 [4]                                                   | UK     | Prevalence of type 2 diabetes and hypertension in the CKD population, by albuminuria level |
| Hypertension                               | Barzilay et al., 2018 [20]                                      | UK     |                                                                                            |
|                                            | HSE, 2016 [4]                                                   | UK     |                                                                                            |
| <b>Cardiovascular complications of CKD</b> |                                                                 |        |                                                                                            |
| Heart failure                              | Piccinni et al., 2017 [79]                                      | Italy  | Incidence                                                                                  |
|                                            | Bosch et al., 2019 [80]                                         | -      | Prevalence                                                                                 |
|                                            | USRDS, 2009 [7]                                                 | USA    | Relative risk                                                                              |
| Myocardial infarction                      | Registro dell'infarto miocardico acuto nell'ASL di Brescia [81] | Italy  | Incidence                                                                                  |
|                                            | Hellenic Statistical Authority, 2020 [82]                       | -      | Prevalence                                                                                 |
|                                            | USRDS, 2009 [7]                                                 | USA    | Relative risk                                                                              |
| Stroke                                     | Karantali et al., 2022 [83]                                     | -      | Incidence                                                                                  |
|                                            | Hellenic Statistical Authority, 2020 [82]                       | -      | Prevalence                                                                                 |
|                                            | Masson et al., 2015 [10]                                        | -      | Relative risk                                                                              |
| <b>Mortality</b>                           |                                                                 |        |                                                                                            |
| Mortality by CKD stage                     | UN, World Population Prospects, 2019 [11, 12]                   | -      | Total number of deaths by age and sex                                                      |
|                                            | Levey et al., 2011 [13]                                         | -      | Probability of dying from any cause by CKD stage                                           |
| <b>Diagnosis rates</b>                     |                                                                 |        |                                                                                            |
| Diagnosis rates by stage                   | Hirst et al., 2020 [14]                                         | UK     | Average calculated from both inputs                                                        |
|                                            | HSE, 2016 [4]                                                   | UK     |                                                                                            |
|                                            | Maccabi database (data on file)                                 | Israel | Stages 1 and 2                                                                             |
| <b>Hungary</b>                             |                                                                 |        |                                                                                            |
| eGFR                                       | Zdrojewski et al., 2015 [84]                                    | Poland | eGFR data by age and two risk categories, disaggregated using UK data                      |
| Albuminuria                                | Chudek et al., 2014 [85]                                        | Poland | Albuminuria data by age and risk category                                                  |
| <b>KRT parameters</b>                      |                                                                 |        |                                                                                            |
| KRT initiation threshold                   | Pyart et al., 2020 [27]                                         | UK     |                                                                                            |
| Chance of being treated                    | O'Callaghan et al., 2011 [16]                                   | UK     |                                                                                            |



|                                            |                                                                                                |         |                                                                                                             |
|--------------------------------------------|------------------------------------------------------------------------------------------------|---------|-------------------------------------------------------------------------------------------------------------|
| Peritoneal dialysis                        | Calculated using NHIFA real-world data                                                         | -       | Incidence and prevalence of patients receiving KRT who are undergoing peritoneal dialysis and haemodialysis |
| Haemodialysis                              | MANET - Hungarian Society of Nephrology 2016–2019 [86]<br>NHIFA real-world data (data on file) | -       | Prevalence of KRT per 100 000 by year<br>Transplantation rate per 100 dialysis patient-years                |
| Transplantation                            | Analysis from national inpatient claims database (data on file)                                | Romania | Annual risk of transplantation failure                                                                      |
| <b>Comorbidities of CKD</b>                |                                                                                                |         |                                                                                                             |
| Type 2 diabetes                            | Analysis from national inpatient claims database (data on file)                                | Romania | Proportion of type 2 diabetes and hypertension in the CKD population, by albuminuria level                  |
| Hypertension                               |                                                                                                |         |                                                                                                             |
| <b>Cardiovascular complications of CKD</b> |                                                                                                |         |                                                                                                             |
| Heart failure                              | Hungarian NHIFA analysis, 2019 (data on file)                                                  | -       | Incidence and prevalence                                                                                    |
|                                            | USRDS, 2009 [7]                                                                                | USA     | Relative risk                                                                                               |
| Myocardial infarction                      | Hungarian NHIFA analysis, 2019 (data on file)                                                  | -       | Incidence and prevalence                                                                                    |
|                                            | USRDS, 2009 [7]                                                                                | USA     | Relative risk                                                                                               |
| Stroke                                     | Hungarian NHIFA analysis, 2019 (data on file)                                                  | -       | Incidence and prevalence                                                                                    |
|                                            | Masson et al., 2015 [10]                                                                       | -       | Relative risk                                                                                               |
| <b>Mortality</b>                           |                                                                                                |         |                                                                                                             |
| Mortality by CKD stage                     | UN, World Population Prospects, 2019 [11, 12]                                                  | -       | Total number of deaths by age and sex                                                                       |
|                                            | Levey et al., 2011 [13]                                                                        | -       | Probability of dying from any cause by CKD stage                                                            |
| <b>Diagnosis rates</b>                     |                                                                                                |         |                                                                                                             |
| Diagnosis rates by stage                   | Hirst et al., 2020 [14]                                                                        | UK      | Stages 1 and 2                                                                                              |
|                                            | Average from TriNetX and LCED database analysis by AstraZeneca (data on file)                  | USA     | Stages 3a and 3b                                                                                            |
|                                            | Bakris et al., 2020 [38]                                                                       | USA     | Stages 4 and 5                                                                                              |
| <b>India</b>                               |                                                                                                |         |                                                                                                             |
| eGFR                                       | Anand et al., 2015 [87]                                                                        | -       | Disaggregated based on [4]                                                                                  |
| Albuminuria                                |                                                                                                |         |                                                                                                             |
| <b>KRT parameters</b>                      |                                                                                                |         |                                                                                                             |
| KRT initiation threshold                   | Prof. Eiichiro Kanda, personal communication                                                   | Japan   |                                                                                                             |
| Chance of being treated                    | UK Renal Registry [88]                                                                         | UK      |                                                                                                             |

|                                            |                                                                                                                  |                     |                                                                                                                                 |
|--------------------------------------------|------------------------------------------------------------------------------------------------------------------|---------------------|---------------------------------------------------------------------------------------------------------------------------------|
| Peritoneal dialysis                        | Parameswaran et al., 2011 [89]<br><br>Nitta et al., 2020 [90]<br>Japanese Society for Transplantation, 2020 [91] | -<br><br>Japan [91] | Incidence of patients who are undergoing KRT<br><br>Prevalence of patients who are undergoing KRT calculated from [90] and [91] |
| Haemodialysis                              | Bharati et al., 2020 [92]<br>Zhang et al., 2019 [47]<br>(rescaled to India population)                           | China [47]          | Prevalence of KRT per 100 000 by year                                                                                           |
| Transplantation                            | Japanese Society for Transplantation, 2020 [91]<br><br>Xue et al., 2017 [50]                                     | Japan<br><br>China  | Calculated transplantation rate<br><br>Risk of transplantation failure                                                          |
| <b>Comorbidities of CKD</b>                |                                                                                                                  |                     |                                                                                                                                 |
| Type 2 diabetes                            | NHANES, 2020 [93]                                                                                                | USA                 |                                                                                                                                 |
| Hypertension                               |                                                                                                                  |                     |                                                                                                                                 |
| <b>Cardiovascular complications of CKD</b> |                                                                                                                  |                     |                                                                                                                                 |
| Heart failure                              | Japanese-language paper [52]                                                                                     | Japan               | Incidence                                                                                                                       |
|                                            | E-Stat Japan [94]                                                                                                | Japan               | Prevalence                                                                                                                      |
|                                            | USRDS, 2009 [7]                                                                                                  | USA                 | Relative risk                                                                                                                   |
| Myocardial infarction                      | Japanese Registry of All Cardiac and Vascular Diseases [95]                                                      | Japan               | Incidence                                                                                                                       |
|                                            | Ministry of Health, Labour and Welfare, 2019 [96]                                                                | Japan               | Prevalence                                                                                                                      |
|                                            | USRDS, 2009 [7]                                                                                                  | USA                 | Relative risk                                                                                                                   |
| Stroke                                     | Das et al., 2006 [97]                                                                                            | -                   | Incidence and prevalence                                                                                                        |
|                                            | Masson et al., 2015 [10]                                                                                         | -                   | Relative risk                                                                                                                   |
| <b>Mortality</b>                           |                                                                                                                  |                     |                                                                                                                                 |
| Mortality by CKD stage                     | UN, World Population Prospects, 2019 [11, 12]                                                                    | -                   | Total number of deaths by age and sex                                                                                           |
|                                            | Levey et al., 2011 [13]                                                                                          | -                   | Probability of dying from any cause by CKD stage                                                                                |
| <b>Diagnosis rates</b>                     |                                                                                                                  |                     |                                                                                                                                 |
| Diagnosis rates by stage                   | Hirst et al., 2020 [14]                                                                                          | UK                  | Average calculated from both inputs                                                                                             |
|                                            | HSE, 2016 [4]                                                                                                    | UK                  |                                                                                                                                 |
| <b>Israel</b>                              |                                                                                                                  |                     |                                                                                                                                 |
| eGFR                                       | Maccabi database, 2019 (database not publicly available)                                                         | -                   | Percentage distribution of eGFR and albuminuria by age and sex                                                                  |
| Albuminuria                                |                                                                                                                  |                     |                                                                                                                                 |
| <b>KRT parameters</b>                      |                                                                                                                  |                     |                                                                                                                                 |
| KRT initiation threshold                   | Pyart et al., 2020 [27]                                                                                          | UK                  |                                                                                                                                 |
| Chance of being treated                    | Prof. Avraham Karasik, personal communication                                                                    | -                   |                                                                                                                                 |

|                                            |                                                          |       |                                                                                                           |
|--------------------------------------------|----------------------------------------------------------|-------|-----------------------------------------------------------------------------------------------------------|
| Peritoneal dialysis                        | Israel Government Dialysis Report, 2020 [98]             | -     | Incidence of patients who are undergoing KRT                                                              |
| Haemodialysis                              |                                                          |       | Prevalence of patients who are undergoing KRT                                                             |
| Transplantation                            | Pyart et al., 2020 [27]                                  | UK    | Transplantation rate<br>Prevalence of KRT modality per 100 000 by year<br>Risk of transplantation failure |
| <b>Comorbidities of CKD</b>                |                                                          |       |                                                                                                           |
| Type 2 diabetes                            | Maccabi database, 2019 (database not publicly available) | -     | Prevalence of type 2 diabetes and hypertension in the CKD population, by albuminuria level                |
| Hypertension                               |                                                          |       |                                                                                                           |
| <b>Cardiovascular complications of CKD</b> |                                                          |       |                                                                                                           |
| Heart failure                              | Maccabi database, 2019                                   | -     | Incidence and prevalence                                                                                  |
|                                            | USRDS, 2009 [7]                                          | USA   | Relative risk                                                                                             |
| Myocardial infarction                      | Maccabi database, 2019                                   | -     | Incidence and prevalence                                                                                  |
|                                            | USRDS, 2009 [7]                                          | USA   | Relative risk                                                                                             |
| Stroke                                     | Maccabi database, 2019                                   | -     | Incidence and prevalence                                                                                  |
|                                            | Masson et al., 2015 [10]                                 | -     | Relative risk                                                                                             |
| <b>Mortality</b>                           |                                                          |       |                                                                                                           |
| Mortality by CKD stage                     | UN, World Population Prospects, 2019 [11, 12]            | -     | Total number of deaths by age and sex                                                                     |
|                                            | Levey et al., 2011 [13]                                  | -     | Probability of dying from any cause by CKD stage                                                          |
| <b>Diagnosis rates</b>                     |                                                          |       |                                                                                                           |
| Diagnosis rates by stage                   | Maccabi database, 2019                                   | -     | Diagnosis rates provided by agency (database not publicly available)                                      |
| <b>Italy</b>                               |                                                          |       |                                                                                                           |
| eGFR                                       | De Nicola et al., 2015 [99]                              | -     | Percentage distribution of eGFR and albuminuria by age/sex, distributed based on data from France         |
| Albuminuria                                |                                                          |       |                                                                                                           |
| <b>KRT parameters</b>                      |                                                          |       |                                                                                                           |
| KRT initiation threshold                   | Ministero della Salute, 2014 [100]                       | -     |                                                                                                           |
| Chance of being treated                    | Organización Nacional de Trasplantes, 2018 [28]          | Spain |                                                                                                           |
| Peritoneal dialysis                        | Organización Nacional de Trasplantes, 2018 [28]          | Spain | Incidence of patients who are undergoing KRT                                                              |
|                                            | Nordio et al., 2020 [101]                                | -     | Prevalence of patients who are undergoing KRT                                                             |

|                                            |                                                                               |       |                                                                                                   |
|--------------------------------------------|-------------------------------------------------------------------------------|-------|---------------------------------------------------------------------------------------------------|
| Haemodialysis                              | Organización Nacional de Trasplantes, 2018 [28]<br><br>Grandaliano, 2020 [78] | Spain | Prevalence of KRT per 100 000 by year                                                             |
| Transplantation                            |                                                                               |       | Transplantation rate per 100 dialysis patients<br><br>Calculated from 10-year failure rate of 40% |
| <b>Comorbidities of CKD</b>                |                                                                               |       |                                                                                                   |
| Type 2 diabetes                            | Ruiz-Hurtado et al., 2016 [33]                                                | Spain | Prevalence of type 2 diabetes and hypertension in the CKD population, by albuminuria level        |
| Hypertension                               |                                                                               |       |                                                                                                   |
| <b>Cardiovascular complications of CKD</b> |                                                                               |       |                                                                                                   |
| Heart failure                              | Piccinni et al., 2017 [79]                                                    | -     | Prevalence calculated from incidence                                                              |
|                                            | USRDS, 2009 [7]                                                               | -     | Relative risk                                                                                     |
| Myocardial infarction                      | Registro dell'infarto miocardico acuto nell'ASL di Brescia [81]               | -     | Prevalence calculated from incidence                                                              |
|                                            | USRDS, 2009 [7]                                                               | USA   | Relative risk                                                                                     |
| Stroke                                     | Corso et al., 2013 [102]                                                      | -     | Prevalence calculated from incidence                                                              |
|                                            | Masson et al., 2015 [10]                                                      | -     | Relative risk                                                                                     |
| <b>Mortality</b>                           |                                                                               |       |                                                                                                   |
| Mortality by CKD stage                     | UN, World Population Prospects, 2019 [11, 12]                                 | -     | Total number of deaths by age and sex                                                             |
|                                            | Levey et al., 2011 [13]                                                       | -     | Probability of dying from any cause by CKD stage                                                  |
| <b>Diagnosis rates</b>                     |                                                                               |       |                                                                                                   |
| Diagnosis rates by stage                   | Hirst et al., 2020 [14]                                                       | UK    | Stages 1 and 2                                                                                    |
|                                            | Average from TriNetX and LCED database analysis by AstraZeneca (data on file) | USA   | Stages 3a and 3b                                                                                  |
|                                            | Bakris et al., 2020 [38]                                                      | USA   | Stages 4 and 5                                                                                    |
| <b>Japan</b>                               |                                                                               |       |                                                                                                   |
| eGFR                                       | Japanese Society of Nephrology, 2012 [45]                                     | -     | Percentage distribution of eGFR and albuminuria by age/sex                                        |
| Albuminuria                                | HSE, 2016 [4]                                                                 | UK    | Aged <40 years                                                                                    |
|                                            | Japanese Society of Nephrology, 2012 [45]                                     | -     | Aged >40 years: Japan AER albuminuria data by single age category, redistributed based on UK data |
| <b>KRT parameters</b>                      |                                                                               |       |                                                                                                   |
| KRT initiation threshold                   | Prof. Eiichiro Kanda, personal communication                                  |       |                                                                                                   |
| Chance of being treated                    | O'Callaghan et al., 2011 [16]                                                 | UK    |                                                                                                   |
| Peritoneal dialysis                        | Calculated using Yagisawa et al., 2019 [103] and Nitta et al., 2020 [90]      | -     | Incidence of patients who are undergoing KRT                                                      |

|                                            |                                                                                                                          |         |                                                                                            |
|--------------------------------------------|--------------------------------------------------------------------------------------------------------------------------|---------|--------------------------------------------------------------------------------------------|
| Haemodialysis                              | Calculated using Nitta et al., 2020 [90] and the Japanese Society for Transplantation, 2020 [91]                         | -       | Prevalence of patients who are undergoing KRT                                              |
| Transplantation                            | Calculated<br>UK Renal Registry (p91) [19]                                                                               | -<br>UK | Transplantation rate<br>Risk of transplantation failure                                    |
| <b>Comorbidities of CKD</b>                |                                                                                                                          |         |                                                                                            |
| Type 2 diabetes                            | HSE, 2016 [4]                                                                                                            | UK      | Prevalence of type 2 diabetes and hypertension in the CKD population, by albuminuria level |
| Hypertension                               | Barzilay et al., 2018 [20]                                                                                               | UK      |                                                                                            |
|                                            | HSE, 2016 [4]                                                                                                            | UK      |                                                                                            |
| <b>Cardiovascular complications of CKD</b> |                                                                                                                          |         |                                                                                            |
| Heart failure                              | Japanese-language paper [52]                                                                                             | -       | Incidence                                                                                  |
|                                            | E-Stat Japan [94]                                                                                                        | -       | Prevalence                                                                                 |
|                                            | USRDS, 2009 [7]                                                                                                          | USA     | Relative risk                                                                              |
| Myocardial infarction                      | Japanese-language paper [52]                                                                                             | -       | Incidence                                                                                  |
|                                            | The Japanese Registry of All Cardiac and Vascular Diseases, 2019 [95]; Ministry of Health, Labour and Welfare, 2019 [96] | -       | Prevalence                                                                                 |
|                                            | USRDS, 2009 [7]                                                                                                          | USA     | Relative risk                                                                              |
| Stroke                                     | Takashima et al., 2017 [104]                                                                                             | -       | Incidence                                                                                  |
|                                            | E-Stat Japan [94]                                                                                                        | -       | Prevalence                                                                                 |
|                                            | Masson et al., 2015 [10]                                                                                                 | -       | Relative risk                                                                              |
| <b>Mortality</b>                           |                                                                                                                          |         |                                                                                            |
| Mortality by CKD stage                     | UN, World Population Prospects, 2019 [11, 12]                                                                            | -       | Total number of deaths by age and sex                                                      |
|                                            | Levey et al., 2011 [13]                                                                                                  | -       | Probability of dying from any cause by CKD stage                                           |
| <b>Diagnosis rates</b>                     |                                                                                                                          |         |                                                                                            |
| Diagnosis rates by stage                   | Hirst et al., 2020 [14]                                                                                                  | UK      | Average calculated from both inputs                                                        |
|                                            | HSE, 2016 [4]                                                                                                            | UK      |                                                                                            |
| <b>Mexico</b>                              |                                                                                                                          |         |                                                                                            |
| eGFR                                       | Cueto-Manzano et al., 2014 [105]                                                                                         | -       | Percentage distribution of eGFR and albuminuria by age/sex                                 |
| Albuminuria                                |                                                                                                                          |         |                                                                                            |
| <b>KRT parameters</b>                      |                                                                                                                          |         |                                                                                            |
| KRT initiation threshold                   | USRDS, 2020 [106]                                                                                                        | USA     |                                                                                            |
| Chance of being treated                    | Garcia-Garcia et al., 2007 [107]                                                                                         | -       |                                                                                            |
| Peritoneal dialysis                        | USRDS, 2020 [108]                                                                                                        | USA     | Incidence of patients who are undergoing KRT                                               |

|                                            |                                                                               |       |                                                                                                              |
|--------------------------------------------|-------------------------------------------------------------------------------|-------|--------------------------------------------------------------------------------------------------------------|
| Haemodialysis                              | USRDS, 2020 - average from both regions [106] (Jalisco and Aguascalientes)    | USA   | Prevalence of KRT by year                                                                                    |
|                                            | USRDS, 2021 [40]                                                              | USA   | Prevalence of patients who are undergoing KRT                                                                |
| Transplantation                            | USRDS, 2020 [106]                                                             | USA   | Transplantation rate<br>Risk of transplantation failure                                                      |
| <b>Comorbidities of CKD</b>                |                                                                               |       |                                                                                                              |
| Type 2 diabetes                            | Ruiz-Hurtado et al., 2016 [33]                                                | Spain | Prevalence of type 2 diabetes and hypertension in the CKD population, by albuminuria level                   |
| Hypertension                               |                                                                               |       |                                                                                                              |
| <b>Cardiovascular complications of CKD</b> |                                                                               |       |                                                                                                              |
| Heart failure                              | Fernández-Gassó et al., 2019 [34]                                             | Spain | Incidence                                                                                                    |
|                                            | Farré et al., 2017 [108]                                                      | -     | Prevalence                                                                                                   |
|                                            | USRDS, 2009 [7]                                                               | USA   | Relative risk                                                                                                |
| Myocardial infarction                      | IHME Global Burden of Diseases, 2019 [25]                                     | -     | Incidence and Prevalence                                                                                     |
|                                            | USRDS, 2009 [7]                                                               | USA   | Relative risk                                                                                                |
| Stroke                                     | IHME Global Burden of Diseases, 2019 [25]                                     | -     | Incidence and prevalence                                                                                     |
|                                            | Masson et al., 2015 [10]                                                      | -     | Relative risk                                                                                                |
| <b>Mortality</b>                           |                                                                               |       |                                                                                                              |
| Mortality by CKD stage                     | UN, World Population Prospects, 2019 [11, 12]                                 | -     | Total number of deaths by age and sex                                                                        |
|                                            | Levey et al., 2011 [13]                                                       | -     | Probability of dying from any cause by CKD stage                                                             |
| <b>Diagnosis rates</b>                     |                                                                               |       |                                                                                                              |
| Diagnosis rates by stage                   | Hirst et al., 2020 [14]                                                       | UK    | Stages 1 and 2                                                                                               |
|                                            | Average from TriNetX and LCED database analysis by AstraZeneca (data on file) | USA   | Stages 3a and 3b                                                                                             |
|                                            | Bakris et al., 2020 [38]                                                      | USA   | Stages 4 and 5                                                                                               |
| <b>Netherlands</b>                         |                                                                               |       |                                                                                                              |
| eGFR                                       | HSE, 2016 [4]                                                                 | UK    | Stages by 5-year age categories                                                                              |
| Albuminuria                                | HSE, 2016 [4]                                                                 | UK    | Stages for four age groups                                                                                   |
| <b>KRT parameters</b>                      |                                                                               |       |                                                                                                              |
| KRT initiation threshold                   | Dutch guideline for diabetic nephropathy, 2020 [109]                          | -     |                                                                                                              |
| Chance of being treated                    | O'Callaghan et al., 2011 [16]                                                 | UK    |                                                                                                              |
| Peritoneal dialysis                        | Nefrovisie, 2022 [110]                                                        | -     | Incidence and prevalence of patients receiving KRT who were undergoing peritoneal dialysis and haemodialysis |
| Haemodialysis                              |                                                                               |       | Prevalence of KRT by year                                                                                    |

|                                            |                                                                      |           |                                                                                                                                                                                                                                                   |
|--------------------------------------------|----------------------------------------------------------------------|-----------|---------------------------------------------------------------------------------------------------------------------------------------------------------------------------------------------------------------------------------------------------|
| Transplantation                            | O'Callaghan et al., 2011 [16]                                        | -         | Transplantation rate per 100 dialysis patients per year<br><br>Annual risk of transplantation failure                                                                                                                                             |
| <b>Comorbidities of CKD</b>                |                                                                      |           |                                                                                                                                                                                                                                                   |
| Type 2 diabetes                            | HSE, 2016 [4]                                                        | UK        | Prevalence of type 2 diabetes and hypertension in the CKD population by albuminuria level                                                                                                                                                         |
| Hypertension                               | HSE, 2016 [4]                                                        | UK        |                                                                                                                                                                                                                                                   |
| <b>Cardiovascular complications of CKD</b> |                                                                      |           |                                                                                                                                                                                                                                                   |
| Heart failure                              | Dutch Heart Foundation, 2021 [111]                                   | -         | Incidence and prevalence                                                                                                                                                                                                                          |
|                                            | USRDS, 2009 [7]                                                      | USA       | Relative risk                                                                                                                                                                                                                                     |
| Myocardial infarction                      | Dutch Heart Foundation, 2021 [111]                                   | -         | Incidence and prevalence                                                                                                                                                                                                                          |
|                                            | USRDS, 2009 [7]                                                      | USA       | Relative risk                                                                                                                                                                                                                                     |
| Stroke                                     | Dutch Heart Foundation, 2021 [111]                                   | -         | Incidence and prevalence                                                                                                                                                                                                                          |
|                                            | Masson et al., 2015 [10]                                             | -         | Relative risk                                                                                                                                                                                                                                     |
| <b>Mortality</b>                           |                                                                      |           |                                                                                                                                                                                                                                                   |
| Mortality by CKD stage                     | UN, World Population Prospects, 2019 [11, 12]                        | -         | Total number of deaths by age and sex                                                                                                                                                                                                             |
|                                            | Levey et al., 2011 [13]                                              | -         | Probability of dying from any cause by CKD stage                                                                                                                                                                                                  |
| <b>Diagnosis rates</b>                     |                                                                      |           |                                                                                                                                                                                                                                                   |
| Diagnosis rates by stage                   | Hirst et al., 2020 [14]                                              | UK        | Average calculated from both inputs                                                                                                                                                                                                               |
|                                            | HSE, 2016 [4]                                                        | UK        |                                                                                                                                                                                                                                                   |
| <b>Philippines</b>                         |                                                                      |           |                                                                                                                                                                                                                                                   |
| eGFR                                       | Nang et al., 2009 [112]                                              | Singapore | Percentage prevalence of each eGFR stage, disaggregated by age and sex using data from UK and China                                                                                                                                               |
| Albuminuria                                | Piccolli et al., 2017 [26]                                           | Brazil    | Percentage distribution of eGFR and albuminuria by age/sex                                                                                                                                                                                        |
| <b>KRT parameters</b>                      |                                                                      |           |                                                                                                                                                                                                                                                   |
| KRT initiation threshold                   | Watanabe et al., 2015 [46]                                           | Japan     |                                                                                                                                                                                                                                                   |
| Chance of being treated                    | O'Callaghan et al., 2011 [16]                                        | UK        |                                                                                                                                                                                                                                                   |
| Peritoneal dialysis                        | Chinese National Renal Data System [48]<br><br>Xue et al., 2017 [50] | USA       | Incidence and prevalence of patients receiving KRT who were undergoing peritoneal dialysis and haemodialysis, and prevalence of KRT by year<br><br>Transplantation rate per 100 dialysis patients per year<br><br>Risk of transplantation failure |
| Haemodialysis                              |                                                                      | China     |                                                                                                                                                                                                                                                   |
| Transplantation                            |                                                                      | China     |                                                                                                                                                                                                                                                   |

| <b>Comorbidities of CKD</b>                |                                                                                                                          |           |                                                                                                                                                                                                                                      |
|--------------------------------------------|--------------------------------------------------------------------------------------------------------------------------|-----------|--------------------------------------------------------------------------------------------------------------------------------------------------------------------------------------------------------------------------------------|
| Type 2 diabetes                            | HSE, 2016 [4]                                                                                                            | UK        | Categorized by albuminuria level                                                                                                                                                                                                     |
| Hypertension                               | HSE, 2016 [4]                                                                                                            | UK        |                                                                                                                                                                                                                                      |
|                                            | Barzilay et al., 2018 [20]                                                                                               | UK        |                                                                                                                                                                                                                                      |
| <b>Cardiovascular complications of CKD</b> |                                                                                                                          |           |                                                                                                                                                                                                                                      |
| Heart failure                              | Japanese-language paper [52]                                                                                             | Japan     | Incidence                                                                                                                                                                                                                            |
|                                            | E-Stat Japan [94]                                                                                                        | Japan     | Prevalence                                                                                                                                                                                                                           |
|                                            | USRDS, 2009 [7]                                                                                                          | USA       | Relative risk                                                                                                                                                                                                                        |
| Myocardial infarction                      | Japanese-language paper [52]                                                                                             | Japan     | Incidence                                                                                                                                                                                                                            |
|                                            | The Japanese Registry of All Cardiac and Vascular Diseases, 2019 [95]; Ministry of Health, Labour and Welfare, 2019 [96] | Japan     | Prevalence                                                                                                                                                                                                                           |
|                                            | USRDS, 2009 [7]                                                                                                          | USA       | Relative risk                                                                                                                                                                                                                        |
| Stroke                                     | IHME Global Burden of Diseases, 2019 [25]                                                                                | -         | Incidence and prevalence                                                                                                                                                                                                             |
|                                            | Masson et al., 2015 [10]                                                                                                 | -         | Relative risk                                                                                                                                                                                                                        |
| <b>Mortality</b>                           |                                                                                                                          |           |                                                                                                                                                                                                                                      |
| Mortality by CKD stage                     | UN, World Population Prospects, 2019 [11, 12]                                                                            | -         | Total number of deaths by age and sex                                                                                                                                                                                                |
|                                            | Levey et al., 2011 [13]                                                                                                  | -         | Probability of dying from any cause by CKD stage                                                                                                                                                                                     |
| <b>Diagnosis rates</b>                     |                                                                                                                          |           |                                                                                                                                                                                                                                      |
| Diagnosis rates by stage                   | Wong et al., 2018 [114]                                                                                                  | Singapore |                                                                                                                                                                                                                                      |
| <b>Poland</b>                              |                                                                                                                          |           |                                                                                                                                                                                                                                      |
| eGFR                                       | Zdrojewski et al., 2015 [84]                                                                                             | -         | eGFR data by age and two risk categories, disaggregated using UK data. Albuminuria data by age and risk category                                                                                                                     |
| Albuminuria                                | Chudek et al., 2014 [85]                                                                                                 | -         |                                                                                                                                                                                                                                      |
| <b>KRT parameters</b>                      |                                                                                                                          |           |                                                                                                                                                                                                                                      |
| KRT initiation threshold                   | Myśliwiec, 2021 [115]                                                                                                    | -         |                                                                                                                                                                                                                                      |
| Chance of being treated                    | NHF CKD, 2020 [116]                                                                                                      | -         | Chance of being treated, incidence and prevalence of patients receiving KRT who were undergoing dialysis, and prevalence of KRT by year<br><br>Rate per 100 dialysis patients per year<br><br>Annual risk of transplantation failure |
| Peritoneal dialysis                        | Dębska-Ślizień et al., 2020 [117]                                                                                        | -         |                                                                                                                                                                                                                                      |
| Haemodialysis                              |                                                                                                                          |           |                                                                                                                                                                                                                                      |
| Transplantation                            | ANZDATA 43rd Annual Report, 2020 [3]                                                                                     | Australia |                                                                                                                                                                                                                                      |
| <b>Comorbidities of CKD</b>                |                                                                                                                          |           |                                                                                                                                                                                                                                      |
| Type 2 diabetes                            | HSE, 2016 [4]                                                                                                            | UK        | Prevalence of type 2 diabetes and hypertension in the CKD population, by albuminuria level                                                                                                                                           |
| Hypertension                               | Barzilay et al., 2018 [20]                                                                                               | UK        |                                                                                                                                                                                                                                      |



|                                            |                                                                                        |                  |                                                                                                                  |
|--------------------------------------------|----------------------------------------------------------------------------------------|------------------|------------------------------------------------------------------------------------------------------------------|
|                                            | HSE, 2016 [4]                                                                          | UK               |                                                                                                                  |
| <b>Cardiovascular complications of CKD</b> |                                                                                        |                  |                                                                                                                  |
| Heart failure                              | MPZ Kardiologia, 2018 [118]                                                            | -                | Incidence                                                                                                        |
|                                            | National inpatient claims database analysis (data on file)                             | Romania          | Prevalence                                                                                                       |
|                                            | USRDS, 2009 [7]                                                                        | USA              | Relative risk                                                                                                    |
| Myocardial infarction                      | National inpatient claims database analysis (data on file)                             | Romania          | Incidence                                                                                                        |
|                                            | Dutch Heart Foundation, 2021 [111]                                                     | Netherlands      | Prevalence                                                                                                       |
|                                            | USRDS, 2009 [7]                                                                        | USA              | Relative risk                                                                                                    |
| Stroke                                     | National inpatient claims database analysis (data on file)                             | Romania          | Incidence                                                                                                        |
|                                            | Dutch Heart Foundation, 2021 [111]                                                     | Netherlands      | Prevalence                                                                                                       |
|                                            | Masson et al., 2015 [10]                                                               | -                | Relative risk                                                                                                    |
| <b>Mortality</b>                           |                                                                                        |                  |                                                                                                                  |
| Mortality by CKD stage                     | UN, World Population Prospects, 2019 [11, 12]                                          | -                | Total number of deaths by age and sex                                                                            |
|                                            | Levey et al., 2011 [13]                                                                | -                | Probability of dying from any cause by CKD stage                                                                 |
| <b>Diagnosis rates</b>                     |                                                                                        |                  |                                                                                                                  |
| Diagnosis rates by stage                   | Hirst et al., 2020 [14]                                                                | UK               | Average calculated from both inputs                                                                              |
|                                            | HSE, 2016 [4]                                                                          | UK               |                                                                                                                  |
| <b>Romania</b>                             |                                                                                        |                  |                                                                                                                  |
| eGFR                                       | Zdrojewski et al., 2015 [84]<br>Chudek et al., 2014 [85]                               | Poland<br>Poland | eGFR data by age and two risk categories, disaggregated using UK data                                            |
| Albuminuria                                |                                                                                        |                  | Albuminuria data by age and risk category                                                                        |
| <b>KRT parameters</b>                      |                                                                                        |                  |                                                                                                                  |
| KRT initiation threshold                   | Myśliwiec, 2021 [115]                                                                  | Poland           |                                                                                                                  |
| Chance of being treated                    | O'Callaghan et al., 2011 [16]                                                          | UK               | Divided by the results of a calculation that estimated the percentage of the population of the UK undergoing KRT |
| Peritoneal dialysis                        | Spitalul Clinic de Nefrologie Carol Davila, 2022 [119]                                 | -                | Incidence and prevalence of patients receiving KRT who are undergoing dialysis                                   |
| Haemodialysis                              | Haemodialysis and peritoneal dialysis: Romanian Renal Registry Report, 2019–2020 [120] | -                | Prevalence of KRT by year                                                                                        |

|                                            |                                                                 |             |                                                                                            |
|--------------------------------------------|-----------------------------------------------------------------|-------------|--------------------------------------------------------------------------------------------|
| Transplantation                            | ERA-EDTA annual reports [121]                                   | -           | Prevalence of KRT by year                                                                  |
|                                            | Spitalul Clinic de Nefrologie Carol Davila, 2017 [122]          | -           | Rate per 100 dialysis patients per year                                                    |
|                                            | Analysis from national inpatient claims database (data on file) | -           | Annual risk of transplantation failure                                                     |
| <b>Comorbidities of CKD</b>                |                                                                 |             |                                                                                            |
| Type 2 diabetes                            | Analysis from national inpatient claims database (data on file) | -           | Prevalence of type 2 diabetes and hypertension in the CKD population, by albuminuria level |
| Hypertension                               |                                                                 |             |                                                                                            |
| <b>Cardiovascular complications of CKD</b> |                                                                 |             |                                                                                            |
| Heart failure                              | MPZ Kardiologia, 2018 [118]                                     | Poland      | Incidence                                                                                  |
|                                            | National inpatient claims database analysis (data on file)      | -           | Prevalence                                                                                 |
|                                            | USRDS, 2009 [7]                                                 | USA         | Relative risk                                                                              |
| Myocardial infarction                      | National inpatient claims database analysis (data on file)      | -           | Incidence                                                                                  |
|                                            | Dutch Heart Foundation, 2021 [111]                              | Netherlands | Prevalence                                                                                 |
|                                            | USRDS, 2009 [7]                                                 | USA         | Relative risk                                                                              |
| Stroke                                     | National inpatient claims database analysis (data on file)      | -           | Incidence                                                                                  |
|                                            | Dutch Heart Foundation, 2021 [111]                              | Netherlands | Prevalence                                                                                 |
|                                            | Masson et al., 2015 [10]                                        | -           | Relative risk                                                                              |
| <b>Mortality</b>                           |                                                                 |             |                                                                                            |
| Mortality by CKD stage                     | UN, World Population Prospects, 2019 [11, 12]                   | -           | Total number of deaths by age and sex                                                      |
|                                            | Levey et al., 2011 [13]                                         | -           | Probability of dying from any cause by CKD stage                                           |
| <b>Diagnosis rates</b>                     |                                                                 |             |                                                                                            |
| Diagnosis rates by stage                   | Hirst et al., 2020 [14]                                         | UK          | Average calculated from both inputs                                                        |
|                                            | HSE, 2016 [4]                                                   | UK          |                                                                                            |
| <b>Saudi Arabia</b>                        |                                                                 |             |                                                                                            |
| eGFR                                       | Ahmed et al., 2014 [123]                                        | -           | Percentage distribution of eGFR and albuminuria by age/sex                                 |
| Albuminuria                                | NHANES, 2020 [93]                                               | USA         |                                                                                            |
| <b>KRT parameters</b>                      |                                                                 |             |                                                                                            |
| KRT initiation threshold                   | USRDS, 2020 [113]                                               | USA         |                                                                                            |
| Chance of being treated                    | Organización Nacional de Trasplantes, 2018 [28]                 | Spain       |                                                                                            |
| Peritoneal dialysis                        | Al-Attar, 2021 [124]                                            | -           | Incidence and prevalence of patients receiving KRT who are undergoing dialysis             |

|                                            |                                                                               |              |                                                                                                                    |
|--------------------------------------------|-------------------------------------------------------------------------------|--------------|--------------------------------------------------------------------------------------------------------------------|
| Haemodialysis                              | Saudi Center for Organ Transplantation, 2019 [125]                            | -            | Prevalence of KRT by modality                                                                                      |
| Transplantation                            | Calculated from Neves et al., 2021 [31]<br>UK Renal Registry (p91) [19]       | Brazil<br>UK | Transplantation rate<br>Risk of transplantation failure                                                            |
| <b>Comorbidities of CKD</b>                |                                                                               |              |                                                                                                                    |
| Type 2 diabetes                            | NHANES, 2020 [93]                                                             | USA          | Prevalence of type 2 diabetes and hypertension in the CKD population by albuminuria level                          |
| Hypertension                               |                                                                               |              |                                                                                                                    |
| <b>Cardiovascular complications of CKD</b> |                                                                               |              |                                                                                                                    |
| Heart failure                              | Benjamin et al., 2019 [126]                                                   | USA          | Incidence calculated from prevalence                                                                               |
|                                            | USRDS, 2009 [7]                                                               | USA          | Relative risk                                                                                                      |
| Myocardial infarction                      | Mozaffarian et al., 2015 [127]                                                | USA          | Incidence calculated from prevalence                                                                               |
|                                            | USRDS, 2009 [7]                                                               | USA          | Relative risk                                                                                                      |
| Stroke                                     | Alhazzani et al., 2018 [128]                                                  | -            | Incidence                                                                                                          |
|                                            | IHME Global Burden of Diseases, 2019 [25]                                     | -            | Prevalence                                                                                                         |
|                                            | Masson et al., 2015 [10]                                                      | -            | Relative risk                                                                                                      |
| <b>Mortality</b>                           |                                                                               |              |                                                                                                                    |
| Mortality by CKD stage                     | UN, World Population Prospects, 2019 [11, 12]                                 | -            | Total number of deaths by age and sex                                                                              |
|                                            | Levey et al., 2011 [13]                                                       | -            | Probability of dying from any cause by CKD stage                                                                   |
| <b>Diagnosis rates</b>                     |                                                                               |              |                                                                                                                    |
| Diagnosis rates by stage                   | Hirst et al., 2020 [14]                                                       | UK           | Stages 1 and 2                                                                                                     |
|                                            | Average from TriNetX and LCED database analysis by AstraZeneca (data on file) | USA          | Stages 3a and 3b                                                                                                   |
|                                            | Bakris et al., 2020 [38]                                                      | USA          | Stages 4 and 5                                                                                                     |
| <b>Singapore</b>                           |                                                                               |              |                                                                                                                    |
| eGFR                                       | Nang et al., 2009 [112]                                                       | -            | Disaggregated into more granular eGFR stages using data from China, and disaggregated by age and sex using UK data |
| Albuminuria                                | Nang et al., 2009 [112]                                                       | -            |                                                                                                                    |
| <b>KRT parameters</b>                      |                                                                               |              |                                                                                                                    |
| KRT initiation threshold                   | Watanabe et al., 2015 [46]                                                    | Japan        |                                                                                                                    |
| Chance of being treated                    | Singapore Renal Registry Annual Report, 2018 [129]                            | -            | Chance of being treated, incidence and prevalence of patients receiving KRT who                                    |

|                                            |                                                                                                   |                |                                                                                                              |
|--------------------------------------------|---------------------------------------------------------------------------------------------------|----------------|--------------------------------------------------------------------------------------------------------------|
| Peritoneal dialysis                        |                                                                                                   |                | are undergoing dialysis, and prevalence of KRT by year                                                       |
| Haemodialysis                              |                                                                                                   |                |                                                                                                              |
| Transplantation                            | Chinese National Renal Data System [48]<br><br>Singapore Renal Registry Annual Report, 2018 [129] | China<br><br>- | Rate per 100 dialysis patients per year<br><br>Annual risk of transplantation failure                        |
| <b>Comorbidities of CKD</b>                |                                                                                                   |                |                                                                                                              |
| Type 2 diabetes                            | HSE, 2016 [4]                                                                                     | UK             | Prevalence of type 2 diabetes and hypertension in the CKD population, by albuminuria level                   |
| Hypertension                               | Barzilay et al., 2018 [20]                                                                        | UK             |                                                                                                              |
|                                            | HSE, 2016 [4]                                                                                     | UK             |                                                                                                              |
| <b>Cardiovascular complications of CKD</b> |                                                                                                   |                |                                                                                                              |
| Heart failure                              | Calculated                                                                                        |                | Incidence                                                                                                    |
|                                            | Sun et al., 2009 [51]                                                                             | China          | Prevalence                                                                                                   |
|                                            | USRDS, 2009 [7]                                                                                   | USA            | Relative risk                                                                                                |
| Myocardial infarction                      | Singapore Myocardial Infarction Registry Annual Report, 2018 [130]                                | -              | Incidence                                                                                                    |
|                                            | Calculated                                                                                        | -              | Prevalence                                                                                                   |
|                                            | USRDS, 2009 [7]                                                                                   | USA            | Relative risk                                                                                                |
| Stroke                                     | IHME Global Burden of Diseases, 2019 [25]                                                         | -              | Incidence and prevalence                                                                                     |
|                                            | Masson et al., 2015 [10]                                                                          | -              | Relative risk                                                                                                |
| <b>Mortality</b>                           |                                                                                                   |                |                                                                                                              |
| Mortality by CKD stage                     | UN, World Population Prospects, 2019 [11, 12]                                                     | -              | Total number of deaths by age and sex                                                                        |
|                                            | Levey et al., 2011 [13]                                                                           | -              | Probability of dying from any cause by CKD stage                                                             |
| <b>Diagnosis rates</b>                     |                                                                                                   |                |                                                                                                              |
| Diagnosis rates by stage                   | Wong et al., 2018 [114]                                                                           | -              |                                                                                                              |
| <b>South Korea</b>                         |                                                                                                   |                |                                                                                                              |
| eGFR                                       | Park et al., 2016 [131]<br><br>Kim et al., 2009 [132]                                             | -<br><br>-     | Percentage distribution of eGFR and albuminuria by age/sex ( $\geq 0$ years with each stage of CKD)          |
| Albuminuria                                |                                                                                                   |                | Percentage distribution of eGFR and albuminuria by age/sex ( $\geq 18$ years with each stage of albuminuria) |

| <b>KRT parameters</b>                      |                                                         |     |                                                                                            |
|--------------------------------------------|---------------------------------------------------------|-----|--------------------------------------------------------------------------------------------|
| KRT initiation threshold                   | Assumption                                              |     |                                                                                            |
| Chance of being treated                    | O'Callaghan et al., 2011 [16]                           | UK  |                                                                                            |
| Peritoneal dialysis                        | Korean Society of Nephrology [133]                      | -   | Incidence and prevalence of patients receiving KRT who are undergoing dialysis             |
| Haemodialysis                              | Korean Society of Nephrology [133]                      | -   | Transplantation rate per 100 dialysis patients per year                                    |
|                                            | Kim and Jin, 2020 [134]                                 | -   | Prevalence of KRT by modality                                                              |
| Transplantation                            | Park et al., 2020 [135]                                 | -   | Risk of transplantation failure                                                            |
| <b>Comorbidities of CKD</b>                |                                                         |     |                                                                                            |
| Type 2 diabetes                            | HSE, 2016 [4]                                           | UK  | Prevalence of type 2 diabetes and hypertension in the CKD population, by albuminuria level |
| Hypertension                               | HSE, 2016 [4]                                           | -   |                                                                                            |
|                                            | Barzilay et al., 2018 [20]                              | UK  |                                                                                            |
| <b>Cardiovascular complications of CKD</b> |                                                         |     |                                                                                            |
| Heart failure                              | National Health Interview Survey, 2018 [136]            | -   | Incidence                                                                                  |
|                                            | Lee et al., 2016 [137]                                  | -   | Prevalence                                                                                 |
|                                            | USRDS, 2009 [7]                                         | USA | Relative risk                                                                              |
| Myocardial infarction                      | Kim et al., 2019 [138]                                  | -   | Prevalence calculated from incidence                                                       |
|                                            | USRDS, 2009 [7]                                         | USA | Relative risk                                                                              |
| Stroke                                     | Korea Disease Control and Prevention Agency, 2018 [139] | -   | Incidence and prevalence                                                                   |
|                                            | Masson et al., 2015 [10]                                | -   | Relative risk                                                                              |
| <b>Mortality</b>                           |                                                         |     |                                                                                            |
| Mortality by CKD stage                     | UN, World Population Prospects, 2019 [11, 12]           | -   | Total number of deaths by age and sex                                                      |
|                                            | Levey et al., 2011 [13]                                 | -   | Probability of dying from any cause by CKD stage                                           |
| <b>Diagnosis rates</b>                     |                                                         |     |                                                                                            |
| Diagnosis rates by stage                   | Hirst et al., 2020 [14]                                 | UK  | Average calculated from both inputs                                                        |
|                                            | HSE, 2016 [4]                                           | UK  |                                                                                            |
| <b>Spain</b>                               |                                                         |     |                                                                                            |
| eGFR                                       | Otero et al., 2010 [53]                                 | -   | Categorical eGFR data, redistributed based on UK data                                      |
| Albuminuria                                | Gorostidi et al., 2018 [54]                             | -   | Categorical albuminuria data for both sexes, by age, redistributed based on UK data        |
|                                            |                                                         |     |                                                                                            |

| <b>KRT parameters</b>                      |                                                                                           |     |                                                                                                                                                                                                                |
|--------------------------------------------|-------------------------------------------------------------------------------------------|-----|----------------------------------------------------------------------------------------------------------------------------------------------------------------------------------------------------------------|
| KRT initiation threshold                   | Prof. Juan Francisco Navarro-González, personal communication                             | -   |                                                                                                                                                                                                                |
| Chance of being treated                    | Organización Nacional de Trasplantes, 2018 [28]                                           | -   | Incidence and prevalence of patients receiving KRT who are undergoing dialysis, and prevalence of KRT by modality<br><br>Transplantation rate per dialysis patient-year<br><br>Risk of transplantation failure |
| Peritoneal dialysis                        |                                                                                           |     |                                                                                                                                                                                                                |
| Haemodialysis                              |                                                                                           |     |                                                                                                                                                                                                                |
| Transplantation                            |                                                                                           |     |                                                                                                                                                                                                                |
| <b>Comorbidities of CKD</b>                |                                                                                           |     |                                                                                                                                                                                                                |
| Type 2 diabetes                            | Ruiz-Hurtado et al., 2016 [33]                                                            | -   | Proportion of type 2 diabetes and hypertension in the CKD population, by albuminuria level                                                                                                                     |
| Hypertension                               |                                                                                           |     |                                                                                                                                                                                                                |
| <b>Cardiovascular complications of CKD</b> |                                                                                           |     |                                                                                                                                                                                                                |
| Heart failure                              | Fernández-Gassó et al., 2019 [34]                                                         | -   | Incidence                                                                                                                                                                                                      |
|                                            | Farré et al., 2017 [108]                                                                  | -   | Prevalence                                                                                                                                                                                                     |
|                                            | USRDS, 2009 [7]                                                                           | USA | Relative risk                                                                                                                                                                                                  |
| Myocardial infarction                      | Forcadell et al., 2018 [36]                                                               | -   | Incidence, prevalence calculated                                                                                                                                                                               |
|                                            | USRDS, 2009 [7]                                                                           | USA | Relative risk                                                                                                                                                                                                  |
| Stroke                                     | Vega et al., 2009 [37]                                                                    | -   | Incidence, prevalence calculated                                                                                                                                                                               |
|                                            | Masson et al., 2015 [10]                                                                  | -   | Relative risk                                                                                                                                                                                                  |
| <b>Mortality</b>                           |                                                                                           |     |                                                                                                                                                                                                                |
| Mortality by CKD stage                     | Instituto Nacional de Estadística, 2020 [141]                                             | -   | Number of deaths by age                                                                                                                                                                                        |
|                                            | Levey et al., 2011 [13]                                                                   | -   | Probability of dying from any cause by CKD stage                                                                                                                                                               |
| <b>Diagnosis rates</b>                     |                                                                                           |     |                                                                                                                                                                                                                |
| Diagnosis rates by stage                   | Hirst et al., 2020 [14]                                                                   | UK  | Stages 1 and 2                                                                                                                                                                                                 |
|                                            | Average from TriNetX and LCED database analysis by AstraZeneca (data on file)             | USA | Stages 3a and 3b                                                                                                                                                                                               |
|                                            | Bakris et al., 2020 [38]                                                                  | USA | Stages 4 and 5                                                                                                                                                                                                 |
| <b>Sweden</b>                              |                                                                                           |     |                                                                                                                                                                                                                |
| eGFR                                       | Analysis of SCREAM data (study information: Mazhar et al., 2022 [in press]); data on file | -   | Categorized by age and sex                                                                                                                                                                                     |
| Albuminuria                                |                                                                                           |     |                                                                                                                                                                                                                |
| <b>KRT parameters</b>                      |                                                                                           |     |                                                                                                                                                                                                                |
| KRT initiation threshold                   | Prof. Johan Ärnlöv, personal communication                                                | -   |                                                                                                                                                                                                                |

|                                            |                                                                                           |             |                                                                                                               |
|--------------------------------------------|-------------------------------------------------------------------------------------------|-------------|---------------------------------------------------------------------------------------------------------------|
| Chance of being treated                    | Frei et al., 2008 [74]                                                                    | Germany     |                                                                                                               |
| Peritoneal dialysis                        | Svenskt Njurregister, 2021 [141]                                                          | -           | Incidence and prevalence of patients receiving KRT who are undergoing dialysis, and prevalence of KRT by year |
| Haemodialysis                              |                                                                                           |             |                                                                                                               |
| Transplantation                            | Jaarrapport, 2019 [18]                                                                    | Belgium     | Transplantation rate per dialysis patient-year                                                                |
|                                            | Njurförbundet, 2021 [142]                                                                 | -           | Annual risk of transplantation failure                                                                        |
| <b>Comorbidities of CKD</b>                |                                                                                           |             |                                                                                                               |
| Type 2 diabetes                            | CELOSIA analysis, 2019 (data on file)                                                     | -           | Proportion of type 2 diabetes and hypertension in the CKD population, by albuminuria level                    |
| Hypertension                               |                                                                                           |             |                                                                                                               |
| <b>Cardiovascular complications of CKD</b> |                                                                                           |             |                                                                                                               |
| Heart failure                              | Analysis of SCREAM data (study information: Mazhar et al., 2022 [in press]); data on file | -           | Incidence and prevalence                                                                                      |
|                                            | USRDS, 2009 [7]                                                                           | USA         | Relative risk                                                                                                 |
| Myocardial infarction                      | Analysis of SCREAM data (study information: Mazhar et al., 2022 [in press]); data on file | -           | Incidence and prevalence                                                                                      |
|                                            | USRDS, 2009 [7]                                                                           | USA         | Relative risk                                                                                                 |
| Stroke                                     | Analysis of SCREAM data (study information: Mazhar et al., 2022 [in press]); data on file | -           | Incidence and prevalence                                                                                      |
|                                            | Masson et al., 2015 [10]                                                                  | -           | Relative risk                                                                                                 |
| <b>Mortality</b>                           |                                                                                           |             |                                                                                                               |
| Mortality by CKD stage                     | UN, World Population Prospects, 2019 [11, 12]                                             | -           | Total number of deaths by age and sex                                                                         |
|                                            | Levey et al., 2011 [13]                                                                   | -           | Probability of dying from any cause by CKD stage                                                              |
| <b>Diagnosis rates</b>                     |                                                                                           |             |                                                                                                               |
| Diagnosis rates by stage                   | CELOSIA analysis, 2019 (data on file)                                                     | -           |                                                                                                               |
| <b>Taiwan</b>                              |                                                                                           |             |                                                                                                               |
| eGFR                                       | Kweon et al., 2014 [143]                                                                  | South Korea | Mean eGFR and albuminuria by age category and sex                                                             |
| Albuminuria                                |                                                                                           |             |                                                                                                               |
| <b>KRT parameters</b>                      |                                                                                           |             |                                                                                                               |
| KRT initiation threshold                   | Prof. Mai-Szu Wu, personal communication                                                  | -           |                                                                                                               |
| Chance of being treated                    | O'Callaghan et al., 2011 [16]                                                             | UK          |                                                                                                               |
| Peritoneal dialysis                        | Taiwan Society of Nephrology, 2019 [144]                                                  | -           | Incidence and prevalence of patients receiving KRT who                                                        |

|                                            |                                                                  |             |                                                                                                               |
|--------------------------------------------|------------------------------------------------------------------|-------------|---------------------------------------------------------------------------------------------------------------|
| Haemodialysis                              |                                                                  |             | are undergoing dialysis, and prevalence of KRT by year                                                        |
| Transplantation                            |                                                                  |             | Transplantation rate per dialysis patient-year<br>Annual risk of transplantation failure                      |
| <b>Comorbidities of CKD</b>                |                                                                  |             |                                                                                                               |
| Type 2 diabetes                            | Lin et al., 2007 [145]                                           | South Korea | Proportion of type 2 diabetes and hypertension in the CKD population, by albuminuria level                    |
| Hypertension                               | Han et al., 2015 [146]                                           | South Korea |                                                                                                               |
| <b>Cardiovascular complications of CKD</b> |                                                                  |             |                                                                                                               |
| Heart failure                              | Ministry of Health and Welfare, 2013 [147]                       | -           | Incidence and prevalence                                                                                      |
|                                            | USRDS, 2009 [7]                                                  | USA         | Relative risk                                                                                                 |
| Myocardial infarction                      | Wang et al., 2019 [148]                                          | -           | Incidence                                                                                                     |
|                                            | Siqueira and De Souza, 2020 [149]                                | -           | Prevalence                                                                                                    |
|                                            | USRDS, 2009 [7]                                                  | USA         | Relative risk                                                                                                 |
| Stroke                                     | Ministry of Health and Welfare, 2013 [147]                       | -           | Incidence, prevalence                                                                                         |
|                                            | Masson et al., 2015 [10]                                         | -           | Relative risk                                                                                                 |
| <b>Mortality</b>                           |                                                                  |             |                                                                                                               |
| Mortality by CKD stage                     | UN, World Population Prospects, 2019 [11, 12]                    | -           | Total number of deaths by age and sex                                                                         |
|                                            | Levey et al., 2011 [13]                                          | -           | Probability of dying from any cause by CKD stage                                                              |
| <b>Diagnosis rates</b>                     |                                                                  |             |                                                                                                               |
| Diagnosis rates by stage                   | Hirst et al., 2020 [14]                                          | UK          | Average calculated from both inputs                                                                           |
|                                            | HSE, 2016 [4]                                                    | UK          |                                                                                                               |
| <b>Thailand</b>                            |                                                                  |             |                                                                                                               |
| eGFR                                       | Perkovic et al., 2008 [150]                                      | -           | Prevalence of eGFR stage by age group                                                                         |
| Albuminuria                                | Zhang et al., 2012 [44]                                          | China       | Categorical albuminuria data for both sexes, by age                                                           |
|                                            | Japanese Society of Nephrology [45]                              | Japan       |                                                                                                               |
| <b>KRT parameters</b>                      |                                                                  |             |                                                                                                               |
| KRT initiation threshold                   | Assoc. Prof. Jason Choo Chon Jun, personal communication         | -           |                                                                                                               |
| Chance of being treated                    | O'Callaghan et al., 2011 [16]                                    | UK          |                                                                                                               |
| Peritoneal dialysis                        | Nephrology Society of Thailand [151]                             | -           | Incidence and prevalence of patients receiving KRT who are undergoing dialysis, and prevalence of KRT by year |
| Haemodialysis                              | Chinese National Renal Data System [48]<br>Xue et al., 2017 [50] | China       | Transplantation rate                                                                                          |
| Transplantation                            |                                                                  | China       |                                                                                                               |



|                                            |                                                                                                                          |           |                                                                                                                                          |
|--------------------------------------------|--------------------------------------------------------------------------------------------------------------------------|-----------|------------------------------------------------------------------------------------------------------------------------------------------|
|                                            |                                                                                                                          |           | Risk of transplantation failure                                                                                                          |
| <b>Comorbidities of CKD</b>                |                                                                                                                          |           |                                                                                                                                          |
| Type 2 diabetes                            | HSE, 2016 [4]                                                                                                            | UK        | Prevalence of type 2 diabetes and hypertension in the CKD population, by albuminuria level                                               |
| Hypertension                               | HSE, 2016 [4]                                                                                                            | UK        |                                                                                                                                          |
|                                            | Barzilay et al., 2018 [20]                                                                                               | UK        |                                                                                                                                          |
| <b>Cardiovascular complications of CKD</b> |                                                                                                                          |           |                                                                                                                                          |
| Heart failure                              | Japanese-language paper [52]                                                                                             | Japan     | Incidence                                                                                                                                |
|                                            | E-Stat Japan [94]                                                                                                        | -         | Prevalence                                                                                                                               |
|                                            | USRDS, 2009 [7]                                                                                                          | USA       | Relative risk                                                                                                                            |
| Myocardial infarction                      | Japanese-language paper [52]                                                                                             | Japan     | Incidence                                                                                                                                |
|                                            | The Japanese Registry of All Cardiac and Vascular Diseases, 2019 [96]; Ministry of Health, Labour and Welfare, 2019 [96] | -         | Prevalence                                                                                                                               |
|                                            | USRDS, 2009 [7]                                                                                                          | USA       | Relative risk                                                                                                                            |
| Stroke                                     | IHME Global Burden of Diseases, 2019 [25]                                                                                | -         | Incidence and prevalence                                                                                                                 |
|                                            | Masson et al., 2015 [10]                                                                                                 | -         | Relative risk                                                                                                                            |
| <b>Mortality</b>                           |                                                                                                                          |           |                                                                                                                                          |
| Mortality by CKD stage                     | UN, World Population Prospects, 2019 [11, 12]                                                                            | -         | Total number of deaths by age and sex                                                                                                    |
|                                            | Levey et al., 2011 [13]                                                                                                  | -         | Probability of dying from any cause by CKD stage                                                                                         |
| <b>Diagnosis rates</b>                     |                                                                                                                          |           |                                                                                                                                          |
| Diagnosis rates by stage                   | Wong et al., 2018 [114]                                                                                                  | Singapore |                                                                                                                                          |
| <b>Türkiye</b>                             |                                                                                                                          |           |                                                                                                                                          |
| eGFR                                       | Süleymanlar et al., 2011 [152]                                                                                           | -         | Categorical eGFR data for adults, disaggregated according to Spain proxy data, and distributed by age and sex according to US proxy data |
| Albuminuria                                |                                                                                                                          |           | Categorical albuminuria data for both sexes, by age                                                                                      |
| <b>KRT parameters</b>                      |                                                                                                                          |           |                                                                                                                                          |
| KRT initiation threshold                   | Prof. Bülent Altun, personal communication                                                                               | -         | Hacettepe University, Department of Nephrology, May 2021                                                                                 |
| Chance of being treated                    | Registry of Nephrology, 2014 [153]                                                                                       | -         |                                                                                                                                          |
| Peritoneal dialysis                        | Registry of Nephrology, 2014 [153]                                                                                       | -         | Incidence and prevalence of patients receiving KRT who are undergoing dialysis                                                           |
| Haemodialysis                              |                                                                                                                          |           | Prevalence of KRT by year                                                                                                                |

|                                               |                                                    |              |                                                                                            |
|-----------------------------------------------|----------------------------------------------------|--------------|--------------------------------------------------------------------------------------------|
| Transplantation                               | Organización Nacional de Trasplantes, 2018 [28]    | Spain        | Transplantation rate per 100 dialysis patients per year<br>Risk of transplantation failure |
| <b>Comorbidities of CKD</b>                   |                                                    |              |                                                                                            |
| Type 2 diabetes                               | HSE, 2016 [4]                                      | UK           | Prevalence of type 2 diabetes and hypertension in the CKD population, by albuminuria level |
| Hypertension                                  | HSE, 2016 [4]                                      | UK           |                                                                                            |
|                                               | Barzilay et al., 2018 [20]                         | UK           |                                                                                            |
| <b>Cardiovascular complications of CKD</b>    |                                                    |              |                                                                                            |
| Heart failure                                 | Fernández-Gassó et al., 2019 [34]                  | Spain        | Incidence                                                                                  |
|                                               | Farré et al., 2017 [108]                           | -            | Prevalence                                                                                 |
|                                               | USRDS, 2009 [7]                                    | USA          | Relative risk                                                                              |
| Myocardial infarction                         | Forcadell et al., 2018 [36]                        | Spain        | Incidence (prevalence calculated)                                                          |
|                                               | USRDS, 2009 [7]                                    | USA          | Relative risk                                                                              |
| Stroke                                        | Vega et al., 2009 [37]                             | Spain        | Incidence                                                                                  |
|                                               | Díaz-Guzmán et al., 2008 [154]                     | -            | Prevalence                                                                                 |
|                                               | Masson et al., 2015 [10]                           | -            | Relative risk                                                                              |
| <b>Mortality</b>                              |                                                    |              |                                                                                            |
| Mortality by CKD stage                        | UN, World Population Prospects, 2019 [11, 12]      | -            | Total number of deaths by age and sex                                                      |
|                                               | Levey et al., 2011 [13]                            | -            | Probability of dying from any cause by CKD stage                                           |
| <b>Diagnosis rates</b>                        |                                                    |              |                                                                                            |
| Diagnosis rates by stage                      | Hirst et al., 2020 [14]                            | UK           | Average calculated from both inputs                                                        |
|                                               | HSE, 2016 [4]                                      | UK           |                                                                                            |
| <b>UAE (Emirati and migrant populations)*</b> |                                                    |              |                                                                                            |
| eGFR                                          | <b>Emirati:</b> Ahmed et al., 2014 [123]           | Saudi Arabia | Categorical eGFR by age                                                                    |
|                                               | <b>Migrant:</b> Anand et al., 2015 [54]            | India        | KDIGO grid                                                                                 |
| Albuminuria                                   | <b>Emirati:</b> NHANES, 2020 [93]                  | USA          | Individual-level continuous albuminuria data                                               |
|                                               | <b>Migrant:</b> Anand et al., 2015 [87]            | India        | KDIGO grid                                                                                 |
| <b>KRT parameters</b>                         |                                                    |              |                                                                                            |
| KRT initiation threshold                      | O'Callaghan et al., 2011 [16]                      | UK           |                                                                                            |
| Chance of being treated                       |                                                    |              |                                                                                            |
| Peritoneal dialysis                           | Al-Attar, 2021 [124]                               | Saudi Arabia | Incidence of patients who are undergoing KRT                                               |
| Haemodialysis                                 | Saudi Center for Organ Transplantation, 2019 [125] | Saudi Arabia | Prevalence of patients who are undergoing KRT, and prevalence of KRT by year               |

|                                            |                                                                               |     |                                                                                            |
|--------------------------------------------|-------------------------------------------------------------------------------|-----|--------------------------------------------------------------------------------------------|
| Transplantation                            | Prof. Stephen Holt, personal communication                                    | -   | Transplantation rate per dialysis patient-year                                             |
|                                            | O'Callaghan et al., 2011 [16]                                                 | -   | Annual risk of transplantation failure                                                     |
| <b>Comorbidities of CKD</b>                |                                                                               |     |                                                                                            |
| Type 2 diabetes                            | NHANES, 2018 [155]                                                            | USA | Prevalence of type 2 diabetes and hypertension in the CKD population, by albuminuria level |
| Hypertension                               |                                                                               |     |                                                                                            |
| <b>Cardiovascular complications of CKD</b> |                                                                               |     |                                                                                            |
| Heart failure                              | Calculated from prevalence                                                    | -   | Incidence                                                                                  |
|                                            | Benjamin et al., 2019 [126]                                                   | USA | Prevalence                                                                                 |
|                                            | USRDS, 2009 [7]                                                               | USA | Relative risk                                                                              |
| Myocardial infarction                      | Calculated from prevalence                                                    | -   | Incidence                                                                                  |
|                                            | Mozaffarian et al., 2015 [127]                                                | USA | Prevalence                                                                                 |
|                                            | USRDS, 2009 [7]                                                               | USA | Relative risk                                                                              |
| Stroke                                     | IHME Global Burden of Diseases, 2019 [25]                                     | -   | Incidence and prevalence                                                                   |
|                                            | Masson et al., 2015 [10]                                                      | -   | Relative risk                                                                              |
| <b>Mortality</b>                           |                                                                               |     |                                                                                            |
| Mortality by CKD stage                     | UN, World Population Prospects, 2019 [11, 12]                                 | -   | Total number of deaths by age and sex                                                      |
|                                            | Levey et al., 2011 [13]                                                       | -   | Probability of dying from any cause by CKD stage                                           |
| <b>Diagnosis rates</b>                     |                                                                               |     |                                                                                            |
| Diagnosis rates by stage                   | Hirst et al., 2020 [14]                                                       | UK  | Stages 1 and 2                                                                             |
|                                            | Average from TriNetX and LCED database analysis by AstraZeneca (data on file) | USA | Stages 3a and 3b                                                                           |
|                                            | Bakris et al., 2020 [38]                                                      | USA | Stages 4 and 5                                                                             |
| <b>UK</b>                                  |                                                                               |     |                                                                                            |
| eGFR                                       | HSE, 2016 [4]                                                                 | -   | Categorical eGFR and albuminuria data for both sexes, by age                               |
| Albuminuria                                |                                                                               |     |                                                                                            |
| <b>KRT parameters</b>                      |                                                                               |     |                                                                                            |
| KRT initiation threshold                   | Dr Albert Power, personal communication                                       | -   |                                                                                            |
| Chance of being treated                    | O'Callaghan et al., 2011 [16]                                                 | -   |                                                                                            |
| Peritoneal dialysis                        | UK Renal Registry [88]                                                        | -   | Incidence and prevalence of patients receiving KRT who are undergoing dialysis             |
| Haemodialysis                              | Pyart et al., 2020 [27]                                                       | -   | KRT prevalence by year                                                                     |
|                                            | USRDS, 2021 [40]                                                              | USA | Transplantation rate per 100 dialysis patients per year                                    |
| Transplantation                            | UK Renal Registry (p91) [19]                                                  | -   | Risk of transplantation failure                                                            |

| <b>Comorbidities of CKD</b>                |                                               |     |                                                                                                                                                                                 |
|--------------------------------------------|-----------------------------------------------|-----|---------------------------------------------------------------------------------------------------------------------------------------------------------------------------------|
| Type 2 diabetes                            | HSE, 2016 [4]                                 | -   | Prevalence of type 2 diabetes and hypertension in the CKD population, by albuminuria level                                                                                      |
| Hypertension                               |                                               |     |                                                                                                                                                                                 |
| <b>Cardiovascular complications of CKD</b> |                                               |     |                                                                                                                                                                                 |
| Heart failure                              | British Heart Foundation, 2020 [5]            | USA | Incidence and prevalence                                                                                                                                                        |
| Myocardial infarction                      | USRDS, 2009 [7]                               | USA | Relative risk                                                                                                                                                                   |
| Stroke                                     | British Heart Foundation, 2020 [5]            | -   | Incidence and prevalence                                                                                                                                                        |
|                                            | Masson et al., 2015 [10]                      | -   | Relative risk                                                                                                                                                                   |
| <b>Mortality</b>                           |                                               |     |                                                                                                                                                                                 |
| Mortality by CKD stage                     | UN, World Population Prospects, 2019 [11, 12] | -   | Total number of deaths by age and sex                                                                                                                                           |
|                                            | Levey et al., 2011 [13]                       | -   | Probability of dying from any cause by CKD stage                                                                                                                                |
| <b>Diagnosis rates</b>                     |                                               |     |                                                                                                                                                                                 |
| Diagnosis rates by stage                   | Hirst et al., 2020 [14]                       | -   | Average calculated from both inputs                                                                                                                                             |
|                                            | HSE, 2016 [4]                                 | -   |                                                                                                                                                                                 |
| <b>USA</b>                                 |                                               |     |                                                                                                                                                                                 |
| eGFR                                       | NHANES, 2020 [93]                             | -   | Individual-level continuous eGFR and albuminuria data                                                                                                                           |
| Albuminuria                                |                                               |     |                                                                                                                                                                                 |
| <b>KRT parameters</b>                      |                                               |     |                                                                                                                                                                                 |
| KRT initiation threshold                   | Prof. Glenn Chertow, personal communication   | -   |                                                                                                                                                                                 |
| Chance of being treated                    | O'Callaghan et al., 2011 [16]                 | UK  |                                                                                                                                                                                 |
| Peritoneal dialysis                        | USRDS, 2021 [156]                             | -   | Incidence and prevalence of patients receiving KRT who are undergoing dialysis<br><br>KRT prevalence by year<br><br>Transplantation rate<br><br>Risk of transplantation failure |
| Haemodialysis                              |                                               |     |                                                                                                                                                                                 |
| Transplantation                            |                                               |     |                                                                                                                                                                                 |
| <b>Comorbidities of CKD</b>                |                                               |     |                                                                                                                                                                                 |
| Type 2 diabetes                            | NHANES, 2020 [93]                             | -   |                                                                                                                                                                                 |
| Hypertension                               |                                               |     |                                                                                                                                                                                 |
| <b>Cardiovascular complications of CKD</b> |                                               |     |                                                                                                                                                                                 |
| Heart failure                              | Benjamin et al., 2019 [126]                   | -   | Prevalence<br><br>Incidence estimated from prevalence and mortality [6]                                                                                                         |
|                                            | USRDS, 2009 [7]                               | -   | Relative risk                                                                                                                                                                   |
| Myocardial infarction                      | Mozaffarian et al., 2015 [127]                | -   | Prevalence<br><br>Incidence estimated from prevalence and mortality [6]                                                                                                         |

|                          |                                                                               |    |                                                                     |
|--------------------------|-------------------------------------------------------------------------------|----|---------------------------------------------------------------------|
|                          | USRDS, 2009 [7]                                                               | -  | Relative risk                                                       |
| Stroke                   | Benjamin et al., 2019 [126]                                                   | -  | Prevalence<br>Incidence estimated from prevalence and mortality [6] |
|                          | Masson et al., 2015 [10]                                                      | -  | Relative risk                                                       |
| <b>Mortality</b>         |                                                                               |    |                                                                     |
| Mortality by CKD stage   | UN, World Population Prospects, 2019 [11, 12]                                 | -  | Total number of deaths by age and sex                               |
|                          | Levey et al., 2011 [13]                                                       | -  | Probability of dying from any cause by CKD stage                    |
| <b>Diagnosis rates</b>   |                                                                               |    |                                                                     |
| Diagnosis rates by stage | Hirst et al., 2020 [14]                                                       | UK | Stages 1 and 2                                                      |
|                          | Average from TriNetX and LCED database analysis by AstraZeneca (data on file) | -  | Stages 3a and 3b                                                    |
|                          | Bakris et al., 2020 [38]                                                      | -  | Stages 4 and 5                                                      |

\*UAE migrant population was modelled separately from the Emirati population owing to distinct population demographics requiring separate input data

ADR=annual data report. AER=albumin excretion rate. ANZDATA=Australia and New Zealand Dialysis and Transplant Registry. CKD=chronic kidney disease. eGFR=estimated glomerular filtration rate. ERA-EDTA=European Renal Association - European Dialysis and Transplant Association. GBE=Gesundheitsberichterstattung. HSE=Health and Safety Executive. IHME=Institute for Health Metrics and Evaluation. KDIGO=Kidney Disease: Improving Global Outcomes. KRT=kidney replacement therapy. LCED=Limited Claims and Electronic Health Record. MANET= Magyar Nephrologiai Társaság. MPZ=Mapa potrzeb zdrowotnych. NHANES=National Health and Nutrition Examination Survey. NHF=National Health Fund. NHIFA=National Health Insurance Fund Administration. REIN= Renal Epidemiology and Information Network. SISPRO=Sistema Integrado de Información de la Protección Social. THIN=The Health Improvement Network. UACR=urine albumin:creatinine ratio. UN=United Nations. USRDS=United States Renal Data System.

**Table S3: External validation of clinical burden of disease outputs**

| Output                           | External validation reference                       | External validation value                                            | Inside CKD 2022 value                             | External validation notes                                                                                                                                                                                       |
|----------------------------------|-----------------------------------------------------|----------------------------------------------------------------------|---------------------------------------------------|-----------------------------------------------------------------------------------------------------------------------------------------------------------------------------------------------------------------|
| <b>Australia</b>                 |                                                     |                                                                      |                                                   |                                                                                                                                                                                                                 |
| CKD prevalence                   | Australia Health Survey 2012 [1]                    | 11 000 per 100 000 (aged ≥18 years)                                  | 8917 per 100 000                                  |                                                                                                                                                                                                                 |
| CKD prevalence change            | Australian Institute of Health and Welfare 2018 [2] | 24% (Stages 1–5)<br>42% (Stages 3a–5)                                | 6.6% (2022–2027)                                  | 1999–2012                                                                                                                                                                                                       |
| Mortality prevalence             | Bikbov et al., 2020 [3]                             | 9.2 per 100 000 (8.3–10.1)                                           | 120 per 100 000 (diagnosed patients with CKD)     | Age-standardized rate in 2017 (95% CI)                                                                                                                                                                          |
| Mortality prevalence change      | Australian Institute of Health and Welfare 2020 [4] | 56.2–52.1 per 100 000                                                | –7.2% (2022–2027 in diagnosed patients with CKD)  | 2010–2018                                                                                                                                                                                                       |
| Heart failure prevalence         | Conrad et al., 2018 [5]: UK data                    | 24 455 per 100 000 (CKD population)                                  | 20 407 per 100 000 (diagnosed patients with CKD)  |                                                                                                                                                                                                                 |
| Myocardial infarction prevalence | Meisinger et al., 2006 [6]: German data             | 1465 per 100 000 (male)<br>482 per 100 000 (female) (CKD population) | 5230 per 100 000 (diagnosed patients with CKD)    | Presented in person-years and recalculated                                                                                                                                                                      |
| Stroke prevalence                | Weiner et al., 2004 [7]                             | 10 896 per 100 000 (CKD population)                                  | 5064 per 100 000 (diagnosed patients with CKD)    |                                                                                                                                                                                                                 |
| <b>Belgium</b>                   |                                                     |                                                                      |                                                   |                                                                                                                                                                                                                 |
| CKD prevalence                   | Bikbov et al., 2020 [3]                             | 5642 per 100 000 (5238–6088)                                         | 14 186 per 100 000                                | Age-standardized rate in 2017 (95% CI)                                                                                                                                                                          |
| CKD prevalence change            | Bikbov et al., 2020 [3]                             | –1.4% (–4.9–1.9%)                                                    | –0.9% (2022–2027)                                 | Change in age-standardized rates, 1990–2017 (95% CI)                                                                                                                                                            |
| Mortality prevalence             | Bikbov et al., 2020 [3]                             | 7.2 per 100 000 (6.7–7.7)                                            | 391 per 100 000 (diagnosed patients with CKD)     | Age-standardized rate (95% CI). Vital registration and verbal autopsy data were used to model mortality due to CKD. Data were standardized and mapped when each death was assigned to a single underlying cause |
| Mortality prevalence change      | Bikbov et al., 2020 [3]                             | –29.4% (–34.9 to –23.4%)                                             | –25.6% (2022–2027 in diagnosed patients with CKD) | Change in age-standardized rates, 1990–2017 (95% CI)                                                                                                                                                            |
| Heart failure prevalence         | Heart Failure Policy Network 2020 [8]               | 1–3% (total population)                                              | 6908 per 100 000 (diagnosed patients with CKD)    |                                                                                                                                                                                                                 |
| Stroke prevalence                | World Bank 1993 [9]                                 | 1876 per 100 000 (total population)                                  | 4851 per 100 000 (diagnosed patients with CKD)    | Population aged 45–54 years (based on estimates from the WHO Global Burden of Disease 2000 study)                                                                                                               |
| <b>Brazil</b>                    |                                                     |                                                                      |                                                   |                                                                                                                                                                                                                 |
| CKD prevalence                   | Barreto et al., 2016 [10]                           | 8.9%                                                                 | 9.7% of national population                       | According to baseline data of 14 636 public sector employees aged 35–74 years; 2008–2010                                                                                                                        |
|                                  | Piccolli et al., 2017 [11]                          | 11.4%                                                                |                                                   | 5216 individuals randomly selected from a pool of 10 000 from the database of a local energy company                                                                                                            |
| Mortality prevalence             | Bikbov et al., 2020 [3]                             | 16.1 per 100 000 (15.8–16.5)                                         | 200 per 100 000 (diagnosed patients with CKD)     | Age-standardized rate (95% CI). Vital registration and verbal autopsy data were used                                                                                                                            |

|                                  |                                 |                                                    |                                                   |                                                                                                                                                                                                                 |
|----------------------------------|---------------------------------|----------------------------------------------------|---------------------------------------------------|-----------------------------------------------------------------------------------------------------------------------------------------------------------------------------------------------------------------|
|                                  |                                 |                                                    |                                                   | to model mortality due to CKD. Data were standardized and mapped when each death was assigned to a single underlying cause                                                                                      |
| Mortality prevalence change      | Souza et al., 2019 [12]         | 2.79–3.14 per 100 000                              | –4.7% (2022–2027 in diagnosed patients with CKD)  | 1996–2016, conducted in a single Brazilian state                                                                                                                                                                |
| Heart failure prevalence         | Stevens et al., 2018 [13]       | 2.0% (total adult population)                      | 8154 per 100 000 (diagnosed patients with CKD)    |                                                                                                                                                                                                                 |
| Myocardial infarction prevalence | Stevens et al., 2018 [13]       | 0.2% (total adult population)                      | 3432 per 100 000 (diagnosed patients with CKD)    |                                                                                                                                                                                                                 |
| Stroke prevalence                | Bensenor et al., 2015 [14]      | 1.6% (male)<br>1.4% (female)<br>(total population) | 3124 per 100 000 (diagnosed patients with CKD)    | From the Brazilian National Health Survey based on self-reported data. 60 202 individuals were interviewed                                                                                                      |
| <b>Canada</b>                    |                                 |                                                    |                                                   |                                                                                                                                                                                                                 |
| CKD prevalence                   | Arora et al., 2013 [15]         | 12 500 per 100 000                                 | 13 344 per 100 000                                | 12.5% of the population aged 6–79 years, 2007–2009                                                                                                                                                              |
| CKD prevalence change            | Bello et al., 2019 [16]         | 5440–4650 per 100 000                              | 13 344–13 649 per 100 000 (2022–2027)             | Study included 559 745 adults in primary healthcare in five provinces: 2010–2015                                                                                                                                |
| Mortality prevalence             | Bikbov et al., 2020 [3]         | 7.9 per 100 000 (7.4–8.5)                          | 259 per 100 000 (diagnosed patients with CKD)     | Age-standardized rate (95% CI). Vital registration and verbal autopsy data were used to model mortality due to CKD. Data were standardized and mapped when each death was assigned to a single underlying cause |
| Heart failure prevalence         | Björn et al., 2015 [17]         | 669 620 cases (total population)                   | 10 197 per 100 000 (diagnosed patients with CKD)  | Population aged ≥40 years, 2012–2013                                                                                                                                                                            |
| Myocardial infarction prevalence | Statista 2019 [18]              | 1.2–2.0% (total population)                        | 7088 per 100 000 (diagnosed patients with CKD)    | Prevalence of diagnosed acute myocardial infarction in Canada, 2000–2013                                                                                                                                        |
| Stroke prevalence                | Mace-Brickman et al., 2019 [19] | 4170 per 100 000 (CKD population)                  | 9633 per 100 000 (diagnosed patients with CKD)    | Of 39 120 patients in Ontario. All CKD stages and kidney failure                                                                                                                                                |
| <b>China</b>                     |                                 |                                                    |                                                   |                                                                                                                                                                                                                 |
| CKD prevalence                   | Bikbov et al., 2020 [3]         | 7180 per 100 000 (6658–7747)                       | 8544 per 100 000                                  | Age-standardized rate in 2017 (95% CI)                                                                                                                                                                          |
|                                  | Wang et al., 2018 [20]          | 11.6%                                              |                                                   |                                                                                                                                                                                                                 |
|                                  | Zhang et al., 2012 [21]         | 10 800 per 100 000                                 |                                                   | Sample population aged ≥18 years, 2009–2010                                                                                                                                                                     |
| CKD prevalence change            | Bikbov et al., 2020 [3]         | –6.1% (–8.1 to –4.3%)                              | 0.6% (2022–2027)                                  | Change in age-standardized rates, 1990–2017 (95% CI)                                                                                                                                                            |
| Mortality prevalence             | Bikbov et al., 2020 [3]         | 10.0 per 100 000 (9.2–10.4)                        | 92 per 100 000 (diagnosed patients with CKD)      | Age-standardized rate in 2017 (95% CI)                                                                                                                                                                          |
|                                  | Zhang et al., 2020 [22]         | 256 per 100 000                                    |                                                   | Patients in hospital with CKD                                                                                                                                                                                   |
| Mortality prevalence change      | Bikbov et al., 2020 [3]         | –19.0% (–30.2 to –13.6%)                           | –21.7% (2022–2027 in diagnosed patients with CKD) | Change in age-standardized rates, 1990–2017 (95% CI)                                                                                                                                                            |

|                                  |                               |                                                                             |                                                   |                                                                                                                                                                                                                                                                                               |
|----------------------------------|-------------------------------|-----------------------------------------------------------------------------|---------------------------------------------------|-----------------------------------------------------------------------------------------------------------------------------------------------------------------------------------------------------------------------------------------------------------------------------------------------|
| Heart failure prevalence         | Zhang et al., 2020 [22]       | 1690 per 100 000 (CKD population)                                           | 4720 per 100 000 (diagnosed patients with CKD)    | Population aged $\geq 18$ years, 2016                                                                                                                                                                                                                                                         |
| Myocardial infarction prevalence | Zhang et al., 2020 [22]       | 1822 per 100 000 (CKD population)                                           | 13 265 per 100 000 (diagnosed patients with CKD)  | 2016                                                                                                                                                                                                                                                                                          |
| Stroke prevalence                | Zhang et al., 2020 [22]       | 1322 per 100 000 (CKD population)                                           | 9018 per 100 000 (diagnosed patients with CKD)    | Population aged $\geq 18$ years                                                                                                                                                                                                                                                               |
| <b>Colombia</b>                  |                               |                                                                             |                                                   |                                                                                                                                                                                                                                                                                               |
| CKD prevalence                   | Bikbov et al., 2020 [3]       | 9638 per 100 000 (8935–10 505)                                              | 6679 per 100 000                                  | Age-standardized rate in 2017 (95% CI)                                                                                                                                                                                                                                                        |
| CKD prevalence change            | Bikbov et al., 2020 [3]       | 1.1% (-4.7–6.4)                                                             | 14.6% (2022–2027)                                 | Change in age-standardized rates, 1990–2017 (95% CI)                                                                                                                                                                                                                                          |
| Mortality prevalence             | Bikbov et al., 2020 [3]       | 15.7 (14.2–17.3)                                                            | 99 per 100 000 (diagnosed patients with CKD)      | Age-standardized rate per 100 000 (95% CI)                                                                                                                                                                                                                                                    |
| Mortality prevalence change      | Bikbov et al., 2020 [3]       | -34.1% (-40.5 to -26.9)                                                     | -3.2% (2022–2027 in diagnosed patients with CKD)  | Change in age-standardized rates, 1990 and 2017 (95% CI)                                                                                                                                                                                                                                      |
| Stroke prevalence                | Pradilla et al., 1995 [23]    | 0.65% (total population)                                                    | 1735 per 100 000 (diagnosed patients with CKD)    | Screening 16 032 people from seven different rural and urban communities                                                                                                                                                                                                                      |
| <b>Denmark</b>                   |                               |                                                                             |                                                   |                                                                                                                                                                                                                                                                                               |
| CKD prevalence                   | Bikbov et al., 2020 [3]       | 5816 per 100 000 (5400–6285)                                                | 13 888 per 100 000                                | Age-standardized rate in 2017 (95% CI)                                                                                                                                                                                                                                                        |
|                                  | Thomsen et al., 2018 [24]     | 9618 per 100 000                                                            |                                                   | 2000–2012                                                                                                                                                                                                                                                                                     |
|                                  | Kampmann et al., 2021 [25]    | 9.93%                                                                       |                                                   | Large register of 669 929 individuals in southern Denmark between 2006 and 2013, providing a geographical coverage of 78%. 66 486 patients had CKD stages 3–5. Only those with a creatinine measurement were included, which could account for an overrepresentation of older/sicker patients |
|                                  | Vestergaard et al., 2022 [26] | 4.6–8.3%                                                                    |                                                   | Diagnosed adult population                                                                                                                                                                                                                                                                    |
| CKD prevalence change            | Bikbov et al., 2020 [3]       | 4.9% (1.8–8.1)                                                              | -2.2% (2022–2027)                                 | Change in age-standardized rates, 1990–2017 (95% CI)                                                                                                                                                                                                                                          |
| Mortality prevalence             | Bikbov et al., 2020 [3]       | 7.7 (7.2–8.3)                                                               | 320 per 100 000 (diagnosed patients with CKD)     | Age-standardized rate per 100 000 (95% CI)                                                                                                                                                                                                                                                    |
|                                  | Vestergaard et al., 2022 [26] | 8.9%                                                                        |                                                   | 1-year mortality                                                                                                                                                                                                                                                                              |
| Mortality prevalence change      | Bikbov et al., 2020 [3]       | 117.1% (101.1–135.2)                                                        | -15.3% (2022–2027 in diagnosed patients with CKD) | Change in age-standardized rates, 1990–2017 (95% CI)                                                                                                                                                                                                                                          |
| Heart failure prevalence         | Thomsen et al., 2018 [24]     | With hyperkalaemia: 19.8%;<br>without hyperkalaemia: 8.5% (CKD population)  | 12 212 per 100 000 (diagnosed patients with CKD)  |                                                                                                                                                                                                                                                                                               |
| Myocardial infarction prevalence | Thomsen et al., 2018 [24]     | With hyperkalaemia: 15.2%;<br>without hyperkalaemia: 10.3% (CKD population) | 10 977 per 100 000 (diagnosed patients with CKD)  |                                                                                                                                                                                                                                                                                               |



|                                  |                           |                                                                                |                                                      |                                                                                                                                                                                                                                  |
|----------------------------------|---------------------------|--------------------------------------------------------------------------------|------------------------------------------------------|----------------------------------------------------------------------------------------------------------------------------------------------------------------------------------------------------------------------------------|
| Stroke prevalence                | Thomsen et al., 2018 [24] | With hyperkalaemia: 18.3%;<br>Without hyperkalaemia: 14.7%<br>(CKD population) | 9984 per 100 000<br>(diagnosed patients with CKD)    | Cerebrovascular disease prevalence                                                                                                                                                                                               |
| <b>France</b>                    |                           |                                                                                |                                                      |                                                                                                                                                                                                                                  |
| CKD prevalence                   | Bikbov et al., 2020 [3]   | 5242 per 100 000<br>(4858–5697)                                                | 10 816 per 100 000                                   | Age-standardized rate in 2017 (95% CI)                                                                                                                                                                                           |
| CKD prevalence change            | Bikbov et al., 2020 [3]   | -1.7%<br>(-6.0–2.5)                                                            | 5.5% (2022–2027)                                     | Change in age-standardized rates, 1990–2017 (95% CI)                                                                                                                                                                             |
| Mortality prevalence             | Bikbov et al., 2020 [3]   | 4.9 (4.6–5.3)                                                                  | 168 per 100 000<br>(diagnosed patients with CKD)     | Age-standardized rate per 100 000 (95% CI)                                                                                                                                                                                       |
| Mortality prevalence change      | Bikbov et al., 2020 [3]   | -25.8%<br>(-31.8 to -18.7)                                                     | -1.7%<br>(2022–2027 in diagnosed patients with CKD)  | Change in age-standardized rates, 1990–2017 (95% CI)                                                                                                                                                                             |
| Heart failure prevalence         | Villain et al., 2020 [27] | 13.1%<br>(CKD population)                                                      | 4712 per 100 000<br>(diagnosed patients with CKD)    | CKD-REIN is a clinic-based, prospective cohort study of 3033 patients with CKD stages 3–4 receiving nephrologist-led care in France                                                                                              |
| Myocardial infarction prevalence | Villain et al., 2020 [27] | 24.5%<br>(CKD population)                                                      | 3626 per 100 000<br>(diagnosed patients with CKD)    | Prevalence of coronary artery disease, defined as a history of angina, myocardial infarction, coronary angioplasty, or bypass. This value will be much higher than predicted for myocardial infarction alone                     |
| Stroke prevalence                | Villain et al., 2020 [27] | 10.0%<br>(CKD population)                                                      | 6019 per 100 000<br>(diagnosed patients with CKD)    | History of ischaemic stroke or a transient ischaemic attack                                                                                                                                                                      |
| <b>Germany</b>                   |                           |                                                                                |                                                      |                                                                                                                                                                                                                                  |
| CKD prevalence                   | Bikbov et al., 2020 [3]   | 5687 per 100 000                                                               | 12 709 per 100 000                                   | Age-standardized rate in 2017                                                                                                                                                                                                    |
|                                  | Brück et al., 2016 [28]   | 17.3% (16.5–18.1)                                                              |                                                      | A study that investigated the prevalence of CKD stages 1–5 (95% CI) in northeast Germany                                                                                                                                         |
| CKD prevalence change            | Bommer 2002 [29]          | 5.4%                                                                           | 2.8%<br>(2022–2027)                                  | 1995–2000                                                                                                                                                                                                                        |
| Mortality prevalence             | Bikbov et al., 2020 [3]   | 11.3 per 100 000<br>(10.2–12.4)                                                | 112 per 100 000<br>(diagnosed patients with CKD)     | Age-standardized rate in 2017 (95% CI)                                                                                                                                                                                           |
| Mortality prevalence change      | Bikbov et al., 2020 [3]   | 45.0% (30.3–61.3%)                                                             | -12.7%<br>(2022–2027 in diagnosed patients with CKD) | Change in age-standardized rates, 1990–2017 (95% CI)                                                                                                                                                                             |
| Heart failure prevalence         | Beck et al., 2015 [30]    | 24–59%<br>(CKD population)                                                     | 1459 per 100 000<br>(diagnosed patients with CKD)    | Observational prospective study with 5015 patients with CKD aged 18–74 years. Heart failure prevalence ranged from 24% in those with eGFR >90 mL/min/1.73m <sup>2</sup> and 59% in those with eGFR <30 mL/min/1.73m <sup>2</sup> |
| Myocardial infarction prevalence | Gößwald et al., 2013 [31] | 1.5–10.2%<br>(total population)                                                | 499 per 100 000<br>(diagnosed patients with CKD)     | Results of the German Health Interview and Examination Survey for Adults (DEGS1) showed that the lifetime                                                                                                                        |

|                                      |                                             |                                |                                                   |                                                                                                                                        |
|--------------------------------------|---------------------------------------------|--------------------------------|---------------------------------------------------|----------------------------------------------------------------------------------------------------------------------------------------|
|                                      |                                             |                                |                                                   | prevalence of myocardial infarction ranged from 1.5% in adults aged 40–49 years to 10.2% in adults aged 70–79 years. Sample size: 5389 |
| Stroke prevalence (total population) | Stroke Alliance for Europe 2017 [32]        | 526 774 (of total population)  | 1035 per 100 000 (diagnosed patients with CKD)    |                                                                                                                                        |
| <b>Greece</b>                        |                                             |                                |                                                   |                                                                                                                                        |
| CKD prevalence                       | Bikbov et al., 2020 [3]                     | 5.34% (4.96–5.81)              | 11.6% of national population                      | Age-standardized prevalence (%), 2017 (95% CI)                                                                                         |
| CKD prevalence change                | Bikbov et al., 2020 [3]                     | –5.3% (–9.1 to –1.1)           | 5.9% (2022–2027)                                  | Change in age-standardized rates, 1990–2017 (95% CI)                                                                                   |
| Mortality prevalence                 | Bikbov et al., 2020 [3]                     | 12.0 (11.2–12.9)               | 281 per 100 000 (diagnosed patients with CKD)     | Age-standardized rate per 100 000 (95% CI)                                                                                             |
| Mortality prevalence change          | Bikbov et al., 2020 [3]                     | –30.0% (–35.3 to –24.1)        | –12.5% (2022–2027 in diagnosed patients with CKD) | Change in age-standardized rates, 1990–2017 (95% CI)                                                                                   |
| Heart failure prevalence             | Calculated from Loutradis et al., 2015 [33] | 17.2% (CKD population)         | 13 769 per 100 000 (diagnosed patients with CKD)  |                                                                                                                                        |
| Myocardial infarction prevalence     |                                             | 34.2% (CKD population)         | 12 484 per 100 000 (diagnosed patients with CKD)  |                                                                                                                                        |
| Stroke prevalence                    |                                             | 4.7% (CKD population)          | 8436 per 100 000 (diagnosed patients with CKD)    |                                                                                                                                        |
| <b>Hungary</b>                       |                                             |                                |                                                   |                                                                                                                                        |
| CKD prevalence                       | Bikbov et al., 2020 [3]                     | 8204 per 100 000 (7596–8882)   | 13 629 per 100 000                                | Age-standardized prevalence (%), 2017 (95% CI)                                                                                         |
| CKD prevalence change                | Bikbov et al., 2020 [3]                     | 1.0% (–2.4–4.5)                | –2.7% (2022–2027)                                 | Change in age-standardized rates, 1990–2017 (95% CI)                                                                                   |
| Mortality prevalence                 | Bikbov et al., 2020 [3]                     | 7.6 per 100 000 (7.2–8.1)      | 526 per 100 000 (diagnosed patients with CKD)     | Age-standardized rate per 100 000 (95% CI)                                                                                             |
|                                      | NHIFA, Hungarian National Statistics [34]   | 526.85 per 100 000             |                                                   | Mortality from real-world data analysis compared with the 2019 total national population                                               |
| Mortality prevalence change          | Bikbov et al., 2020 [3]                     | 34.4% (26.2–44.1)              | –7.1% (2022–2027 in diagnosed patients with CKD)  | Change in age-standardized rates, 1990–2017 (95% CI)                                                                                   |
| <b>India</b>                         |                                             |                                |                                                   |                                                                                                                                        |
| CKD prevalence                       | Bikbov et al., 2020 [3]                     | 9529 per 100 000 (8852–10 280) | 5456 per 100 000                                  | Age-standardized rate in 2017 (95% CI)                                                                                                 |
|                                      | Singh et al., 2013 [35]                     | 17.2%                          |                                                   | In a cohort of 5588, prevalence of CKD stages 1, 2, 3, 4, and 5 was 7%, 4.3%, 4.3%, 0.8%, and 0.8%, respectively                       |
| CKD prevalence change                | Bikbov et al., 2020 [3]                     | 5.6% (3.3–8.2%)                | 2.5% (2022–2027)                                  | Change in age-standardized rates, 1990–2017 (95% CI)                                                                                   |
| Mortality prevalence                 | Bikbov et al., 2020 [3]                     | 22.3 per 100 000 (20.6–23.5)   | 92 per 100 000 (diagnosed patients with CKD)      | Age-standardized rate (95% CI). Vital registration and verbal autopsy data were used to model mortality due to CKD. Data were          |

|                                  |                                     |                                                                        |                                                      |                                                                                                                                                                                                                 |
|----------------------------------|-------------------------------------|------------------------------------------------------------------------|------------------------------------------------------|-----------------------------------------------------------------------------------------------------------------------------------------------------------------------------------------------------------------|
|                                  |                                     |                                                                        |                                                      | standardized and mapped when each death was assigned to a single underlying cause                                                                                                                               |
| Mortality prevalence change      | Bikbov et al., 2020 [3]             | -5.5%<br>(-14.5-2.7%)                                                  | -37.7%<br>(2022-2027 in diagnosed patients with CKD) | Change in age-standardized rates, 1990-2017 (95% CI)                                                                                                                                                            |
| Heart failure prevalence         | Huffman et al., 2010 [36]           | 0.3-1.75 million cases (total population)                              | 11 446 per 100 000 (diagnosed patients with CKD)     | 2010                                                                                                                                                                                                            |
| Stroke prevalence                | Pandian et al., 2013 [37]           | 84-262 per 100 000 (rural); 424 per 100 000 (urban) (total population) | 5597 per 100 000 (diagnosed patients with CKD)       | Estimated adjusted prevalence in 2013                                                                                                                                                                           |
| <b>Israel</b>                    |                                     |                                                                        |                                                      |                                                                                                                                                                                                                 |
| CKD prevalence                   | Bikbov et al., 2020 [3]             | 6246 per 100 000 (5810-6757)                                           | 13 129 per 100 000                                   | Age-standardized rate in 2017 (95% CI)                                                                                                                                                                          |
| CKD prevalence change            | Bikbov et al., 2020 [3]             | 0.6%<br>(-2.1-3.3%)                                                    | -0.4% (2022-2027)                                    | Change in age-standardized rates, 1990-2017 (95% CI)                                                                                                                                                            |
| Mortality prevalence             | Bikbov et al., 2020 [3]             | 17.7 per 100 000 (16.5-19.0)                                           | 228 per 100 000 (diagnosed patients with CKD)        | Age-standardized rate (95% CI). Vital registration and verbal autopsy data were used to model mortality due to CKD. Data were standardized and mapped when each death was assigned to a single underlying cause |
| Mortality prevalence change      | Bikbov et al., 2020 [3]             | -20.9%<br>(-26.6 to -14.2%)                                            | -35.6%<br>(2022-2027 in diagnosed patients with CKD) | Change in age-standardized rates, 1990-2017 (95% CI)                                                                                                                                                            |
| Heart failure prevalence         | Ministry of Health Report 2013 [38] | 1-2% (total population)                                                | 3340 per 100 000 (diagnosed patients with CKD)       | Local-language document                                                                                                                                                                                         |
| Stroke prevalence                | Stroke Alliance for Europe [39]     | 26 450 (total population)                                              | 3073 per 100 000 (diagnosed patients with CKD)       | 2017                                                                                                                                                                                                            |
| <b>Italy</b>                     |                                     |                                                                        |                                                      |                                                                                                                                                                                                                 |
| CKD prevalence                   | Bikbov et al., 2020 [3]             | 5156 per 100 000 (4792-5602)                                           | 6716 per 100 000                                     | Age-standardized rate in 2017 (95% CI)                                                                                                                                                                          |
|                                  | De Nicola et al., 2015 [40]         | 7.05%                                                                  |                                                      | 2008-2012 National Health Examination Survey in Italy, population aged 35-79 years                                                                                                                              |
| CKD prevalence change            | Capuano et al., 2012 [41]           | 5.9-6.2% (male); 3.9-4.5% (female)                                     | 10.2% (2022-2027)                                    | 1998-2009                                                                                                                                                                                                       |
|                                  | Bikbov et al., 2020 [3]             | -9.2%<br>(-12.8 to -6.1%)                                              |                                                      | Change in age-standardized rates, 1990-2017 (95% CI)                                                                                                                                                            |
| Mortality prevalence             | Bikbov et al., 2020 [3]             | 7.3 per 100 000 (6.8-7.9)                                              | 146 per 100 000 (diagnosed patients with CKD)        | Age-standardized rate in 2017 (95% CI)                                                                                                                                                                          |
| Mortality prevalence change      | Bikbov et al., 2020 [3]             | -19.5%<br>(-25.3 to -12.9%)                                            | -5.4%<br>(2022-2027 in diagnosed patients with CKD)  | Change in age-standardized rates, 1990-2017 (95% CI)                                                                                                                                                            |
|                                  | Navarra et al., 2021 [42]           | 60% (male); 54% (female)                                               |                                                      | Over 16 years, 2003-2019                                                                                                                                                                                        |
| Heart failure prevalence         | Barbieri et al., 2020 [43]          | 12 600 per 100 000 (CKD population)                                    | 13 488 per 100 000 (diagnosed patients with CKD)     | CKD stages 3a-5                                                                                                                                                                                                 |
| Myocardial infarction prevalence | Giampaoli et al., 2015 [44]         | 1.6% (male); 0.6% (female) (total population)                          | 11 697 per 100 000 (diagnosed patients with CKD)     | Population aged 35-74 years, 2008-2012                                                                                                                                                                          |

|                                  |                                      |                                        |                                                   |                                                                                                                                                                                                                 |
|----------------------------------|--------------------------------------|----------------------------------------|---------------------------------------------------|-----------------------------------------------------------------------------------------------------------------------------------------------------------------------------------------------------------------|
| Stroke prevalence                | Stroke Alliance for Europe 2017 [45] | 351 820 (total population)             | 8884 per 100 000 (diagnosed patients with CKD)    | 2017                                                                                                                                                                                                            |
| <b>Japan</b>                     |                                      |                                        |                                                   |                                                                                                                                                                                                                 |
| CKD prevalence                   | Bikbov et al., 2020 [3]              | 8404 per 100 000 (7838–9068)           | 18 787 per 100 000                                | Age-standardized rate in 2017 (95% CI)                                                                                                                                                                          |
|                                  | Imai et al., 2007 [46]               | 19.1 million cases                     |                                                   | Population aged >18 years, CKD stages 3a–5, in 2004                                                                                                                                                             |
| CKD prevalence change            | Nagata et al., 2010 [47]             | 13.8–22.1% (male); 14.3–15.3% (female) | 8.5% (2022–2027)                                  | Population aged ≥40 years, 1974–2002                                                                                                                                                                            |
|                                  | Bikbov et al., 2020 [3]              | –5.9% (–8.6 to –3.3%)                  |                                                   | Change in age-standardized rates, 1990–2017 (95% CI)                                                                                                                                                            |
|                                  | Takeuchi et al., 2021 [48]           | 14.1 per 100 000                       |                                                   | 2005–2017                                                                                                                                                                                                       |
| Mortality prevalence             | Bikbov et al., 2020 [3]              | 7.5 per 100 000 (7.1–8.0)              | 400 per 100 000 (diagnosed patients with CKD)     | Age-standardized rate in 2017 (95% CI)                                                                                                                                                                          |
| Mortality prevalence change      | Bikbov et al., 2020 [3]              | –40.3% (–43.0 to –36.3%)               | –2.3% (2022–2027 in diagnosed patients with CKD)  | Change in age-standardized rates, 1990–2017 (95% CI)                                                                                                                                                            |
| Heart failure prevalence         | Tanaka et al., 2017 [49]             | 2764.7 per 100 000 (CKD population)    | 20 942 per 100 000 (diagnosed patients with CKD)  | Patients with CKD, pre-dialysis                                                                                                                                                                                 |
| Myocardial infarction prevalence | Ninomiya et al., 2009 [50]           | 5546.7 per 100 000 (CKD population)    | 22 700 per 100 000 (diagnosed patients with CKD)  |                                                                                                                                                                                                                 |
| <b>Mexico</b>                    |                                      |                                        |                                                   |                                                                                                                                                                                                                 |
| CKD prevalence                   | Bikbov et al., 2020 [3]              | 12 107 per 100 000 (11 292–13 009)     | 10 927 per 100 000                                | Age-standardized rate in 2017 (95% CI)                                                                                                                                                                          |
| CKD prevalence change            | Bikbov et al., 2020 [3]              | 10.2% (7.7–13.0%)                      | 6.3% (2022–2027)                                  | Change in age-standardized rates, 1990–2017 (95% CI)                                                                                                                                                            |
| Mortality prevalence             | Bikbov et al., 2020 [3]              | 58.1 per 100 000 (56.4–59.5)           | 216 per 100 000 (diagnosed patients with CKD)     | Age-standardized rate (95% CI). Vital registration and verbal autopsy data were used to model mortality due to CKD. Data were standardized and mapped when each death was assigned to a single underlying cause |
| Mortality prevalence change      | Bikbov et al., 2020 [3]              | 102.3% (94.4–108.8%)                   | –31.6% (2022–2027 in diagnosed patients with CKD) | Change in age-standardized rates, 1990–2017 (95% CI)                                                                                                                                                            |
| <b>Netherlands</b>               |                                      |                                        |                                                   |                                                                                                                                                                                                                 |
| CKD prevalence                   | Bikbov et al., 2020 [3]              | 6142 per 100 000 (5688–6653)           | 12 194 per 100 000                                | Age-standardized rate in 2017 (95% CI)                                                                                                                                                                          |
|                                  | Sundström et al., 2022 [51]          | 8.9%                                   |                                                   |                                                                                                                                                                                                                 |
| CKD prevalence change            | Bikbov et al., 2020 [3]              | 1.3% (–3.1–6.1%)                       | 5.1% (2022–2027)                                  | Change in age-standardized rates, 1990–2017 (95% CI)                                                                                                                                                            |
| Mortality prevalence             | Bikbov et al., 2020 [3]              | 7.1 per 100 000 (6.7–7.6)              | 244 per 100 000 (diagnosed patients with CKD)     | Age-standardized rate (95% CI). Vital registration and verbal autopsy data were used to model mortality due to CKD. Data were standardized and mapped when each death was assigned to a single underlying cause |

|                                  |                                           |                                         |                                                      |                                                                                                                                                                                                                 |
|----------------------------------|-------------------------------------------|-----------------------------------------|------------------------------------------------------|-----------------------------------------------------------------------------------------------------------------------------------------------------------------------------------------------------------------|
| Mortality prevalence change      | Bikbov et al., 2020 [3]                   | 6.9%<br>(-0.5-15.8%)                    | -11.8%<br>(2022-2027 in diagnosed patients with CKD) | Change in age-standardized rates, 1990-2017 (95% CI)                                                                                                                                                            |
| Heart failure prevalence         | Analysis from Sundström et al., 2022 [51] | 15.05%<br>(CKD population)              | 6946 per 100 000<br>(diagnosed patients with CKD)    |                                                                                                                                                                                                                 |
| Myocardial infarction prevalence |                                           | 27.81%<br>(CKD population)              | 14 495 per 100 000<br>(diagnosed patients with CKD)  |                                                                                                                                                                                                                 |
| Stroke prevalence                |                                           | 18.88%<br>(CKD population)              | 8302 per 100 000<br>(diagnosed patients with CKD)    |                                                                                                                                                                                                                 |
| <b>Philippines</b>               |                                           |                                         |                                                      |                                                                                                                                                                                                                 |
| CKD prevalence                   | Bikbov et al., 2020 [3]                   | 11 049 per 100 000<br>(10 263-11 879)   | 5469 per 100 000                                     | Age-standardized rate in 2017 (95% CI)                                                                                                                                                                          |
|                                  | Morales et al., 2005 [52]                 | 2.6%                                    |                                                      | CKD stages 3a-5, National Nutrition Health Survey 2003 renal report                                                                                                                                             |
| CKD prevalence change            | Bikbov et al., 2020 [3]                   | 13.2% (10.2-16.1%)                      | 5.6% (2022-2027)                                     | Change in age-standardized rates, 1990-2017 (95% CI)                                                                                                                                                            |
| Mortality prevalence             | Bikbov et al., 2020 [3]                   | 50.3 per 100 000<br>(44.5-56.4)         | 89 per 100 000<br>(diagnosed patients with CKD)      | Age-standardized rate (95% CI). Vital registration and verbal autopsy data were used to model mortality due to CKD. Data were standardized and mapped when each death was assigned to a single underlying cause |
| Mortality prevalence change      | Bikbov et al., 2020 [3]                   | 108.9% (83.0-137.8%)                    | -21.4%<br>(2022-2027 in diagnosed patients with CKD) | Change in age-standardized rates, 1990-2017 (95% CI)                                                                                                                                                            |
| Heart failure prevalence         | Tumanan-Mendoza et al., 2017 [53]         | 1.6% per 100 000<br>(total population)  | 13 561 per 100 000<br>(diagnosed patients with CKD)  | Population aged ≥19 years in 2014                                                                                                                                                                               |
| Stroke prevalence                | Sy et al., 2012 [54]                      | 1.4-1.2%<br>(total population)          | 9288 per 100 000<br>(diagnosed patients with CKD)    | 2003-2008                                                                                                                                                                                                       |
| <b>Poland</b>                    |                                           |                                         |                                                      |                                                                                                                                                                                                                 |
| CKD prevalence                   | Bikbov et al., 2020 [3]                   | 7271 per 100 000<br>(6702-7943)         | 10 730 per 100 000                                   | Age-standardized rate in 2017 (95% CI)                                                                                                                                                                          |
| CKD prevalence change            | Bikbov et al., 2020 [3]                   | -6.0%<br>(-12.9-0.9)                    | 5.5% (2022-2027)                                     | Change in age-standardized rates, 1990-2017 (95% CI)                                                                                                                                                            |
| Mortality prevalence             | Bikbov et al., 2020 [3]                   | 4.8 per 100 000 (4.5-5.1)               | 289 per 100 000<br>(diagnosed patients with CKD)     | Age-standardized rate (95% CI). Vital registration and verbal autopsy data were used to model mortality due to CKD. Data were standardized and mapped when each death was assigned to a single underlying cause |
| Mortality prevalence change      | Bikbov et al., 2020 [3]                   | -50.3% per 100 000<br>(-53.5-46.2)      | -18.9%<br>(2022-2027 in diagnosed patients with CKD) | Change in age-standardized rates, 1990-2017 (95% CI)                                                                                                                                                            |
| Heart failure prevalence         | Puch-Walczak et al., 2022 [55]            | 2.4-4.3%<br>(total population)          | 14 986 per 100 000<br>(diagnosed patients with CKD)  | From 2414 participants of NATPOL 2011, aged 18-79                                                                                                                                                               |
| Stroke prevalence                | Stroke Alliance for Europe 2017 [56]      | 652.3 per 100 000<br>(total population) | 46 260 per 100 000<br>(diagnosed patients with CKD)  |                                                                                                                                                                                                                 |

| <b>Romania</b>              |                          |                                      |                                                     |                                                                                                                                                                                                                 |
|-----------------------------|--------------------------|--------------------------------------|-----------------------------------------------------|-----------------------------------------------------------------------------------------------------------------------------------------------------------------------------------------------------------------|
| CKD prevalence              | Bikbov et al., 2020 [3]  | 8204 per 100 000<br>(11 292–13 009)  | 7015 per 100 000                                    | Age-standardized rate in 2017 (95% CI)                                                                                                                                                                          |
| CKD prevalence change       | Bikbov et al., 2020 [3]  | 1.0%<br>(–2.4–4.5%)                  | 20.1% (2022–2027)                                   | Change in age-standardized rates, 1990–2017 (95% CI)                                                                                                                                                            |
| Mortality prevalence        | Bikbov et al., 2020 [3]  | 7.6 per 100 000 (7.2–8.1)            | 123 per 100 000<br>(diagnosed patients with CKD)    | Age-standardized rate (95% CI). Vital registration and verbal autopsy data were used to model mortality due to CKD. Data were standardized and mapped when each death was assigned to a single underlying cause |
| Mortality prevalence change | Bikbov et al., 2020 [3]  | 34.4% (26.2–44.1%)                   | 20.2%<br>(2022–2027 in diagnosed patients with CKD) | Change in age-standardized rates, 1990–2017 (95% CI)                                                                                                                                                            |
| <b>Saudi Arabia</b>         |                          |                                      |                                                     |                                                                                                                                                                                                                 |
| CKD prevalence              | Bikbov et al., 2020 [3]  | 9892 per 100 000<br>(9139–10 812)    | 12 283 per 100 000                                  | Age-standardized rate in 2017 (95% CI)                                                                                                                                                                          |
| CKD prevalence change       | Bikbov et al., 2020 [3]  | 0.1%<br>(–4.0–4.4%)                  | 12.9% (2022–2027)                                   | Change in age-standardized rates, 1990–2017 (95% CI)                                                                                                                                                            |
| Mortality prevalence        | Bikbov et al., 2020 [3]  | 29.9 per 100 000<br>(24.2–34.1)      | 83 per 100 000<br>(diagnosed patients with CKD)     | Age-standardized rate (95% CI). Vital registration and verbal autopsy data were used to model mortality due to CKD. Data were standardized and mapped when each death was assigned to a single underlying cause |
| Mortality prevalence change | Bikbov et al., 2020 [3]  | –2.6%<br>(–21.7–22.7%)               | 9.2%<br>(2022–2027 in diagnosed patients with CKD)  | Change in age-standardized rates, 1990–2017 (95% CI)                                                                                                                                                            |
| Heart failure prevalence    | AbuRuz et al., 2015 [57] | 455 222 cases<br>(total population)  | 5700 per 100 000<br>(diagnosed patients with CKD)   | Extrapolated                                                                                                                                                                                                    |
| Stroke prevalence           | Memon et al., 2019 [58]  | 29 per 100 000<br>(total population) | 1792 per 100 000<br>(diagnosed patients with CKD)   | Although there is a lack of data on the prevalence of stroke in Saudi Arabia, a study conducted by the Ministry of Health reported 29 per 100 000 per year                                                      |
| <b>Singapore</b>            |                          |                                      |                                                     |                                                                                                                                                                                                                 |
| CKD prevalence              | Bikbov et al., 2020 [3]  | 9333 per 100 000<br>(8659–10 090)    | 15 892 per 100 000                                  | Age-standardized rate in 2017 (95% CI)                                                                                                                                                                          |
| CKD prevalence change       | Bikbov et al., 2020 [3]  | –8.8%<br>(–10.9 to –6.6%)            | 8.3% (2022–2027)                                    | Change in age-standardized rates, 1990–2017 (95% CI)                                                                                                                                                            |
|                             | Wong et al., 2018 [59]   | 12.2–24.3%                           |                                                     | 2007–2035, using a Markov model                                                                                                                                                                                 |
| Mortality prevalence        | Bikbov et al., 2020 [3]  | 9.0 per 100 000 (8.4–9.7)            | 143 per 100 000<br>(diagnosed patients with CKD)    | Age-standardized rate (95% CI). Vital registration and verbal autopsy data were used to model mortality due to CKD. Data were standardized and mapped when each death was assigned to a single underlying cause |

|                             |                                     |                                        |                                                     |                                                                                                                                                                                                                 |
|-----------------------------|-------------------------------------|----------------------------------------|-----------------------------------------------------|-----------------------------------------------------------------------------------------------------------------------------------------------------------------------------------------------------------------|
| Mortality prevalence change | Bikbov et al., 2020 [3]             | -36.7%<br>(-41.5 to -31.4%)            | -4.5%<br>(2022–2027 in diagnosed patients with CKD) | Change in age-standardized rates, 1990–2017 (95% CI)                                                                                                                                                            |
| Heart failure prevalence    | Picco et al., 2016 [60]             | 2.8%<br>(CKD population)               | 5424 per 100 000<br>(diagnosed patients with CKD)   | Data analysed from the Singapore Mental Health Study (2009–2010). Sample size: 6616                                                                                                                             |
| Stroke prevalence           | Teh et al., 2018 [61]               | 7.6%<br>(CKD population)               | 5550 per 100 000<br>(diagnosed patients with CKD)   | Data from the Well-being of the Singapore Elderly study, a cross-sectional epidemiological survey conducted 2012–2013                                                                                           |
| <b>South Korea</b>          |                                     |                                        |                                                     |                                                                                                                                                                                                                 |
| CKD prevalence              | Bikbov et al., 2020 [3]             | 7103 per 100 000<br>(6560–7659)        | 10 808 per 100 000                                  | Age-standardized rate in 2017 (95% CI)                                                                                                                                                                          |
| CKD prevalence change       | Lee et al., 2020 [62]               | 57.8–157.1<br>per 100 000              | 19.6% (2022–2027)                                   | Kidney failure. Based on a retrospective population-based cohort study using the National Health Insurance Service–National Sample Cohort; 2006–2015                                                            |
|                             | Bikbov et al., 2020 [3]             | -9.2%<br>(-14.5 to -5.6%)              |                                                     |                                                                                                                                                                                                                 |
| Mortality prevalence        | Bikbov et al., 2020 [3]             | 7.7 per 100 000 (7.1–8.2)              | 71 per 100 000<br>(diagnosed patients with CKD)     | Age-standardized rate (95% CI). Vital registration and verbal autopsy data were used to model mortality due to CKD. Data were standardized and mapped when each death was assigned to a single underlying cause |
| Mortality prevalence change | Bikbov et al., 2020 [3]             | -40.6%<br>(-45.8 to -35.1%)            | 39.1%<br>(2022–2027 in diagnosed patients with CKD) | Change in age-standardized rates, 1990–2017 (95% CI)                                                                                                                                                            |
| Stroke prevalence           | Korean Stroke Society 2018 [63]     | 1.71%<br>(total population)            | 7105 per 100 000<br>(diagnosed patients with CKD)   | Population aged ≥19 years                                                                                                                                                                                       |
| <b>Spain</b>                |                                     |                                        |                                                     |                                                                                                                                                                                                                 |
| CKD prevalence              | Gorostidi et al., 2018 [64]         | 15.1%                                  | 10 729 per 100 000                                  | Population aged ≥18 years, 2008–2010                                                                                                                                                                            |
|                             | Otero González et al., 2010 [65]    | 6.83%                                  |                                                     | Population aged ≥20 years                                                                                                                                                                                       |
| CKD prevalence change       | Bikbov et al., 2020 [3]             | -5.9%<br>(-10.3 to -1.6%)              | 9.1% (2022–2027)                                    | Change in age-standardized rates, 1990–2017 (95% CI)                                                                                                                                                            |
| Mortality prevalence        | Bikbov et al., 2020 [3]             | 8.0 per 100 000 (7.5–8.6)              | 242 per 100 000<br>(diagnosed patients with CKD)    | Age-standardized rate (95% CI). Vital registration and verbal autopsy data were used to model mortality due to CKD. Data were standardized and mapped when each death was assigned to a single underlying cause |
| Mortality prevalence change | Bikbov et al., 2020 [3]             | -32.3%<br>(-37.5 to -26.5%)            | 10.4%<br>(2022–2027 in diagnosed patients with CKD) | Change in age-standardized rates 1990–2017 (95% CI)                                                                                                                                                             |
| Heart failure prevalence    | Martínez-Castelao et al., 2011 [66] | 17 500 per 100 000<br>(CKD population) | 11 403 per 100 000<br>(diagnosed patients with CKD) | Population aged 19–94 years                                                                                                                                                                                     |

|                                  |                                      |                                       |                                                   |                                                                                                                                                                                                                 |
|----------------------------------|--------------------------------------|---------------------------------------|---------------------------------------------------|-----------------------------------------------------------------------------------------------------------------------------------------------------------------------------------------------------------------|
| Myocardial infarction prevalence | Martínez-Castelao et al., 2011 [66]  | 11 100 per 100 000 (CKD population)   | 5270 per 100 000 (diagnosed patients with CKD)    | Population aged 19–94 years                                                                                                                                                                                     |
| Stroke prevalence                | Stroke Alliance for Europe 2017 [67] | 357.3 per 100 000 in total population | 4709 per 100 000 (diagnosed patients with CKD)    | 2017                                                                                                                                                                                                            |
| <b>Sweden</b>                    |                                      |                                       |                                                   |                                                                                                                                                                                                                 |
| CKD prevalence                   | CELOSIA. 2016 [data on file]         | 5437 per 100 000                      | 9258 per 100 000                                  | Age-standardized rate in 2017 (95% CI)                                                                                                                                                                          |
|                                  | CELOSIA. 2017 [data on file]         | 5762 per 100 000                      |                                                   |                                                                                                                                                                                                                 |
|                                  | Bikbov et al., 2020 [3]              | 6839 per 100 000 (6362–7400)          |                                                   |                                                                                                                                                                                                                 |
|                                  | CELOSIA. 2018 [data on file]         | 6154 per 100 000                      |                                                   |                                                                                                                                                                                                                 |
|                                  | CELOSIA. 2019 [data on file]         | 6220 per 100 000                      |                                                   |                                                                                                                                                                                                                 |
|                                  | CELOSIA. 2020 [data on file]         | 6209 per 100 000                      |                                                   |                                                                                                                                                                                                                 |
| CKD prevalence change            | Bikbov et al., 2020 [3]              | 3.0% (0.3–5.7%)                       | 1.5% (2022–2027)                                  | Change in age-standardized rates, 1990–2017 (95% CI)                                                                                                                                                            |
| Mortality prevalence             | Bikbov et al., 2020 [3]              | 5.7 per 100 000 (5.3–6.1)             | 202 per 100 000 (diagnosed patients with CKD)     | Age-standardized rate (95% CI). Vital registration and verbal autopsy data were used to model mortality due to CKD. Data were standardized and mapped when each death was assigned to a single underlying cause |
| Mortality prevalence change      | Bikbov et al., 2020 [3]              | 57.5% (46.9–68.8%)                    | –18.9% (2022–2027 in diagnosed patients with CKD) | Change in age-standardized rates, 1990–2017 (95% CI)                                                                                                                                                            |
| Heart failure prevalence         | Lindmark et al., 2019 [68]           | 2.18% (total population)              | 11 887 per 100 000 (diagnosed patients with CKD)  | Electronic medical records 2014. Primary and secondary care patients from Uppsala and Västerbotten                                                                                                              |
| Stroke prevalence                | Sweden stroke statistics 2022 [69]   | 340 per 100 000 (total population)    | 8356 per 100 000 (diagnosed patients with CKD)    | 2020                                                                                                                                                                                                            |
| <b>Taiwan</b>                    |                                      |                                       |                                                   |                                                                                                                                                                                                                 |
| CKD prevalence                   | Bikbov et al., 2020 [3]              | 8145 per 100 000 (7557–8770)          | 10 620 per 100 000                                | Age-standardized rate in 2017 (95% CI)                                                                                                                                                                          |
| CKD prevalence change            | Tsai et al., 2007 [70]               | 1.99–9.83%                            | 17.1% (2022–2027)                                 | Prospective cohort study of 106 094 individuals aged ≥20 years, 1996–2003                                                                                                                                       |
|                                  | Bikbov et al., 2020 [3]              | –4.9% (–8.0 to –1.7%)                 |                                                   | Change in age-standardized rates, 1990–2017 (95% CI)                                                                                                                                                            |
| Mortality prevalence             | Bikbov et al., 2020 [3]              | 17.4 per 100 000 (6.3–18.5)           | 90 per 100 000 (diagnosed patients with CKD)      | Age-standardized rate (95% CI). Vital registration and verbal autopsy data were used to model mortality due to CKD. Data were standardized and mapped when each death was assigned to a single underlying cause |
| Mortality prevalence change      | Bikbov et al., 2020 [3]              | –15.5% (–1.9 to –8.8%)                | 28.8% (2022–2027 in diagnosed patients with CKD)  | Change in age-standardized rates, 1990–2017 (95% CI)                                                                                                                                                            |



|                                  |                                |                                       |                                                      |                                                                                                                                                                                                                 |
|----------------------------------|--------------------------------|---------------------------------------|------------------------------------------------------|-----------------------------------------------------------------------------------------------------------------------------------------------------------------------------------------------------------------|
| Heart failure prevalence         | Lee et al., 2018 [71]          | 0.6%<br>(CKD population)              | 10 648 per 100 000<br>(diagnosed patients with CKD)  | The prevalence of heart failure in CKD was 0.4% for stage 3, 1.1% for stage 4, and 0.6% for stage 5. Sample: 1463 patients with CKD stages 3–5, ≥18 years of age                                                |
| Stroke prevalence                | Huang et al., 1997 [72]        | 595 per 100 000<br>(total population) | 2858 per 100 000<br>(diagnosed patients with CKD)    | 11 925 individuals were interviewed, and 71 of them had experienced stroke. The crude point prevalence was 5.95 per 1000                                                                                        |
| <b>Thailand</b>                  |                                |                                       |                                                      |                                                                                                                                                                                                                 |
| CKD prevalence                   | Bikbov et al., 2020 [3]        | 10 292 per 100 000<br>(9461–11 174)   | 17 465 per 100 000                                   | Age-standardized rate in 2017 (95% CI)                                                                                                                                                                          |
| CKD prevalence change            | Bikbov et al., 2020 [3]        | –3.9%<br>(–7.2 to –0.3%)              | 8.4% (2022–2027)                                     | Change in age-standardized rates, 1990–2017 (95% CI)                                                                                                                                                            |
| Mortality prevalence             | Bikbov et al., 2020 [3]        | 23.3 per 100 000<br>(20.5–25.9)       | 203 per 100 000<br>(diagnosed patients with CKD)     | Age-standardized rate (95% CI). Vital registration and verbal autopsy data were used to model mortality due to CKD. Data were standardized and mapped when each death was assigned to a single underlying cause |
| Mortality prevalence change      | Bikbov et al., 2020 [3]        | –12.6%<br>(–23.6 to –0.7%)            | 14.0%<br>(2022–2027 in diagnosed patients with CKD)  | Change in age-standardized rates, 1990–2017 (95% CI)                                                                                                                                                            |
| Heart failure prevalence         | Reyes et al., 2016 [73]        | 0.4%<br>(total population)            | 5757 per 100 000<br>(diagnosed patients with CKD)    |                                                                                                                                                                                                                 |
| Myocardial infarction prevalence | Sakboonyarat et al., 2018 [74] | 3.54%<br>(total population)           | 16 061 per 100 000<br>(diagnosed patients with CKD)  | Patients with diabetes (25 902 patients; >18 years, enrolled 2012–2013)                                                                                                                                         |
| Stroke prevalence                | Suwanwela 2014 [75]            | 1.88%<br>(total population)           | 6778 per 100 000<br>(diagnosed patients with CKD)    | Based on the Thai Epidemiological Stroke Study. Population aged ≥45 years                                                                                                                                       |
| <b>Türkiye</b>                   |                                |                                       |                                                      |                                                                                                                                                                                                                 |
| CKD prevalence                   | Bikbov et al., 2020 [3]        | 10 311 per 100 000<br>(9532–11 248)   | 11 742 per 100 000                                   | Age-standardized rate in 2017 (95% CI)                                                                                                                                                                          |
|                                  | Süleymanlar et al., 2011 [76]  | 15.7%                                 |                                                      | Percentage prevalence, 2011                                                                                                                                                                                     |
| CKD prevalence change            | Bikbov et al., 2020 [3]        | –2.5%<br>(–7.4–2.6%)                  | 4.5% (2022–2027)                                     | Change in age-standardized rates, 1990–2017 (95% CI)                                                                                                                                                            |
| Mortality prevalence             | Bikbov et al., 2020 [3]        | 17.8 per 100 000<br>(15.8–19.7)       | 188 per 100 000<br>(diagnosed patients with CKD)     | Age-standardized rate (95% CI). Vital registration and verbal autopsy data were used to model mortality due to CKD. Data were standardized and mapped when each death was assigned to a single underlying cause |
| Mortality prevalence change      | Bikbov et al., 2020 [3]        | –32.0%<br>(–40.4 to –21.7%)           | –25.1%<br>(2022–2027 in diagnosed patients with CKD) | Change in age-standardized rates, 1990–2017 (95% CI)                                                                                                                                                            |
| Heart failure prevalence         | Değertekin et al., 2012 [77]   | 2.9%<br>(total population)            | 5672 per 100 000<br>(diagnosed patients with CKD)    | 4650 randomly selected individuals, aged ≥35 years                                                                                                                                                              |

|                                  |                                 |                                            |                                                      |                                                                                                                                                                                                                 |
|----------------------------------|---------------------------------|--------------------------------------------|------------------------------------------------------|-----------------------------------------------------------------------------------------------------------------------------------------------------------------------------------------------------------------|
| Myocardial infarction prevalence | Kılıç et al., 2020 [78]         | 6.7%<br>(total population)                 | 2208 per 100 000<br>(diagnosed patients with CKD)    | Patients diagnosed with myocardial infarction in 2018. Sample size: 1793                                                                                                                                        |
| Stroke prevalence                | Börü et al., 2018 [79]          | 1.7%<br>(total population)                 | 2408 per 100 000<br>(diagnosed patients with CKD)    | Population aged $\geq 18$ years, 2013. Sample size: 3320                                                                                                                                                        |
| <b>UAE</b>                       |                                 |                                            |                                                      |                                                                                                                                                                                                                 |
| CKD prevalence                   | Xie et al., 2018 [80]           | 3397 per 100 000<br>(9532–11 248)          | 11 345 per 100 000                                   | Prevalence of CKD per 100 000, 2016 (95% CI)                                                                                                                                                                    |
|                                  | Bikbov et al., 2020 [3]         | 9951 per 100 000<br>(9198–10 828)          |                                                      | Age-standardized rate in 2017 (95% CI)                                                                                                                                                                          |
| CKD prevalence change            | Bikbov et al., 2020 [3]         | -4.0%<br>(-7.7–0.1%)                       | 13.7% (2022–2027)                                    | Change in age-standardized rates, 1990–2017 (95% CI)                                                                                                                                                            |
| Mortality prevalence             | Bikbov et al., 2020 [3]         | 30.8 per 100 000<br>(25.3–36.7)            | 55 per 100 000<br>(diagnosed patients with CKD)      | Age-standardized rate (95% CI). Vital registration and verbal autopsy data were used to model mortality due to CKD. Data were standardized and mapped when each death was assigned to a single underlying cause |
| Mortality prevalence change      | Bikbov et al., 2020 [3]         | 3.0%<br>(-18.1–29.0%)                      | 41.0%<br>(2022–2027 in diagnosed patients with CKD)  | Change in age-standardized rates, 1990–2017 (95% CI)                                                                                                                                                            |
| <b>UK</b>                        |                                 |                                            |                                                      |                                                                                                                                                                                                                 |
| CKD prevalence                   | Bikbov et al., 2020 [3]         | 5167 per 100 000<br>(4819–5589)            | 13 377 per 100 000                                   | Age-standardized rates in 2017 (95% CI)                                                                                                                                                                         |
|                                  | Public Health England 2014 [81] | 2.6 million cases (2.3–3.0 million)        |                                                      | Living with CKD stages 3–5 (95% CI) (diagnosed and undiagnosed)                                                                                                                                                 |
| CKD prevalence change            | Bikbov et al., 2020 [3]         | -11.4%<br>(-13.7 to -8.9%)                 | -0.7% (2022–2027)                                    | Change in age-standardized rates, 1990–2017 (95% CI)                                                                                                                                                            |
|                                  | Public Health England 2014 [81] | 8.3%                                       |                                                      | CKD stages 3–5, aged $\geq 16$ years, 2011–2036                                                                                                                                                                 |
|                                  | Hounkpatin et al., 2020 [82]    | 12.6% (2009)–13.9% (2016)                  |                                                      | 17 663 pooled individuals (aged $\geq 16$ ) in the Health Survey for England 2003, 2009/2010 combined and 2016                                                                                                  |
| Mortality prevalence             | Bikbov et al., 2020 [3]         | 4.5 per 100 000 (4.4–4.6)                  | 320 per 100 000<br>(diagnosed patients with CKD)     | Age-standardized rate (95% CI). Vital registration and verbal autopsy data were used to model mortality due to CKD. Data were standardized and mapped when each death was assigned to a single underlying cause |
| Mortality prevalence change      | Bikbov et al., 2020 [3]         | -14.5%<br>(-16.3 to -12.6%)                | -18.4%<br>(2022–2027 in diagnosed patients with CKD) | Change in age-standardized rates, 1990–2017 (95% CI)                                                                                                                                                            |
| Heart failure prevalence         | British Heart Foundation [83]   | >1% depending on age<br>(total population) | 5080 per 100 000<br>(diagnosed patients with CKD)    | Prevalence increased with age, with approximately 1% of people aged $\leq 65$ years affected. This increased to 6–7% for those aged 75–84 years, and 12–22% for those aged $\geq 85$ years                      |

|                                  |                                                                            |                                                               |                                                  |                                                                                                                                                                                                                 |
|----------------------------------|----------------------------------------------------------------------------|---------------------------------------------------------------|--------------------------------------------------|-----------------------------------------------------------------------------------------------------------------------------------------------------------------------------------------------------------------|
| Myocardial infarction prevalence | Jayaraj et al., 2018 [84]                                                  | 915 000 cases (total population)                              | 4493 per 100 000 (diagnosed patients with CKD)   | Self-reported national survey, 2014                                                                                                                                                                             |
| Stroke prevalence                | Health Survey for England 2018 [85]                                        | 2% (aged 45–54 years); 9% (aged ≥75 years) (total population) | 8478 per 100 000 (diagnosed patients with CKD)   | 2017                                                                                                                                                                                                            |
| <b>USA</b>                       |                                                                            |                                                               |                                                  |                                                                                                                                                                                                                 |
| CKD prevalence                   | Bikbov et al., 2020 [3]                                                    | 8144 per 100 000 (7615–8783)                                  | 14 892 per 100 000                               | Age-standardized rate in 2017 (95% CI)                                                                                                                                                                          |
|                                  | United States Renal Data System 2018 [86]                                  | 14.8% per 100 000 (13.6–16.0%)                                |                                                  | Among National Health and Nutrition Examination Survey participants aged ≥20 years, 2011–2014 (95% CI)                                                                                                          |
| CKD prevalence change            | Bikbov et al., 2020 [3]                                                    | 100 per 100 000 (–3.6–8.8%)                                   | 1.4% (2022–2027)                                 | Change in age-standardized rates, 1990–2017 (95% CI)                                                                                                                                                            |
|                                  | National Institute of Diabetes and Digestive and Kidney Diseases 2015 [87] | 2000 per 100 000                                              |                                                  | CKD increased from 12.0–14.0% between 1988 and 1994, and from 1999 to 2004, but has remained stable since 2004. The largest increase occurred in people with CKD stage 3, from 4.5–6.0%, since 1988             |
| Mortality prevalence             | Bikbov et al., 2020 [3]                                                    | 14.6 per 100 000 (14.3–14.9)                                  | 237 per 100 000 (diagnosed patients with CKD)    | Age-standardized rate (95% CI). Vital registration and verbal autopsy data were used to model mortality due to CKD. Data were standardized and mapped when each death was assigned to a single underlying cause |
| Mortality prevalence change      | Bikbov et al., 2020 [3]                                                    | 63 000 per 100 000                                            | –7.7% (2022–2027 in diagnosed patients with CKD) | Change in age-standardized rates, 1990–2017                                                                                                                                                                     |
|                                  | Bowe et al., 2018 [88]                                                     | 58%                                                           |                                                  | 2002–2016                                                                                                                                                                                                       |
| Heart failure prevalence         | Cheung et al., 2004 [89]                                                   | 40 000 per 100 000 (kidney failure population)                | 13 315 per 100 000 (diagnosed patients with CKD) | 40% of 1846 patients undergoing haemodialysis, 1995–2000                                                                                                                                                        |
|                                  | Komanduri et al., 2017 [90]                                                | >5.8 million cases (total population)                         |                                                  |                                                                                                                                                                                                                 |
| Myocardial infarction prevalence | Bradley et al., 2019 [91]                                                  | 427 per 100 000 (total population)                            | 6527 per 100 000 (diagnosed patients with CKD)   | Cohort study of 1.3 million patients hospitalized in US Veterans' Health Administration facilities, 2007–2007                                                                                                   |
| Stroke prevalence                | Benjamin et al., 2018 [92]                                                 | 2.7% (1.9–4.3%) (total population)                            | 13 148 per 100 000 (diagnosed patients with CKD) | Incidence of stroke ranges from 1.9% in Minnesota to 4.3% in Alabama                                                                                                                                            |

CI=confidence interval. CKD=chronic kidney disease. eGFR=estimated glomerular filtration rate. NATPOL=A National, Cross-sectional Observational study conducted in Poland. NHIFA=National Health Insurance Fund Administration. REIN=Renal Epidemiology and Information Network. WHO=World Health Organization.

**Table S4: Baseline percentage of drivers of CKD, and country/region income categories in 2022**

| Country/region                  | Population aged ≥ 65 (%) | Hypertension (%) | Coronary heart disease (%) | Stroke (%) | Diabetes (%) | Smoking (%) | Obesity (%) | Income category |
|---------------------------------|--------------------------|------------------|----------------------------|------------|--------------|-------------|-------------|-----------------|
| <b>Americas</b>                 |                          |                  |                            |            |              |             |             |                 |
| Brazil                          | 9.6                      | 23.3             | 1.9                        | 1.4        | 10.1         | 16.5        | 22.1        | Middle          |
| Canada                          | 18.1                     | 13.2             | 3.3                        | 1.8        | 8.4          | 17.5        | 29.4        | High            |
| Colombia                        | 9.1                      | 19.2             | 2.1                        | 1.0        | 9.8          | 7.9         | 22.3        | Middle          |
| Mexico                          | 7.6                      | 19.7             | 2.0                        | 1.1        | 15.6         | 13.9        | 28.9        | Middle          |
| USA                             | 16.6                     | 12.9             | 2.9                        | 2.3        | 9.4          | 25.1        | 36.2        | High            |
| <b>Europe</b>                   |                          |                  |                            |            |              |             |             |                 |
| Belgium                         | 19.3                     | 17.5             | 3.8                        | 1.3        | 4.8          | 25.0        | 22.1        | High            |
| Denmark                         | 20.2                     | 20.6             | 3.6                        | 1.3        | 5.6          | 18.6        | 19.7        | High            |
| France                          | 20.8                     | 22.0             | 3.4                        | 1.2        | 5.4          | 34.6        | 21.6        | High            |
| Germany                         | 21.7                     | 19.9             | 4.5                        | 1.6        | 5.3          | 28.0        | 22.3        | High            |
| Greece                          | 22.3                     | 19.1             | 3.7                        | 1.6        | 5.1          | 39.1        | 24.9        | High            |
| Hungary                         | 20.2                     | 30.0             | 6.9                        | 2.3        | 6.0          | 30.6        | 26.4        | High            |
| Italy                           | 23.3                     | 21.2             | 4.7                        | 1.3        | 5.1          | 23.4        | 19.9        | High            |
| Netherlands                     | 20.0                     | 18.7             | 4.6                        | 1.3        | 5.3          | 23.4        | 20.4        | High            |
| Poland                          | 18.7                     | 28.7             | 4.1                        | 1.7        | 9.0          | 26.0        | 23.1        | High            |
| Romania                         | 19.2                     | 30.6             | 5.8                        | 2.4        | 7.7          | 25.5        | 22.5        | Middle          |
| Spain                           | 20.0                     | 19.2             | 3.5                        | 1.3        | 6.3          | 27.9        | 23.8        | High            |
| Sweden                          | 20.3                     | 19.3             | 3.8                        | 1.8        | 4.2          | 28.8        | 20.6        | High            |
| Türkiye                         | 9.0                      | 20.3             | 3.6                        | 1.4        | 7.9          | 29.3        | 32.1        | Middle          |
| UK                              | 18.7                     | 15.2             | 3.1                        | 1.1        | 5.2          | 19.2        | 27.8        | High            |
| <b>Asia-Pacific/Middle East</b> |                          |                  |                            |            |              |             |             |                 |
| Australia                       | 16.2                     | 15.2             | 5.3                        | 1.1        | 6.6          | 16.2        | 29.0        | High            |
| China                           | 12.0                     | 19.2             | 3.3                        | 2.1        | 8.8          | 24.7        | 6.2         | Middle          |
| India                           | 6.6                      | 25.8             | 2.8                        | 0.7        | 9.0          | 27.0        | 3.9         | Middle          |
| Israel                          | 12.4                     | 16.6             | 2.2                        | 0.8        | 7.4          | 25.5        | 26.1        | High            |
| Japan                           | 28.4                     | 17.6             | 3.0                        | 3.3        | 7.7          | 21.9        | 4.3         | High            |
| Philippines                     | 5.5                      | 22.6             | 1.7                        | 1.2        | 9.7          | 24.3        | 6.4         | Middle          |
| Saudi Arabia                    | 3.5                      | 23.3             | 2.4                        | 1.4        | 19.6         | 16.6        | 35.4        | High            |
| Singapore                       | 13.4                     | 14.6             | 2.0                        | 1.5        | 9.5          | 16.5        | 6.1         | High            |
| South Korea                     | 15.8                     | 11.0             | 1.6                        | 2.0        | 7.5          | 22.0        | 4.7         | High            |
| Taiwan                          | 16.1                     | 25.0             | 3.7                        | 1.8        | 8.2          | 19.4        | 22.8        | High            |
| Thailand                        | 13.0                     | 22.3             | 2.3                        | 1.7        | 7.5          | 22.8        | 10.0        | High            |
| UAE                             | 1.3                      | 21.1             | 2.2                        | 1.5        | 18.8         | 18.2        | 31.7        | High            |
| <b>Mean</b>                     |                          |                  |                            |            |              |             |             |                 |
| High income                     | 17.4                     | 19.3             | 3.5                        | 1.6        | 7.7          | 23.8        | 22.1        | N/A             |
| Middle income                   | 9.8                      | 22.6             | 2.9                        | 1.4        | 9.8          | 21.1        | 18.1        | N/A             |

**Table S5: Overall prevalence of CKD in 2022 and 2027 expressed as the total number of cases**

| CKD prevalence – total cases (including KRT) |                |            |            |            |           |         |         |                        |      |
|----------------------------------------------|----------------|------------|------------|------------|-----------|---------|---------|------------------------|------|
| Year                                         | Country/region | CKD stage  |            |            |           |         | Total   | % change<br>2022–2027* |      |
|                                              |                | 1          | 2          | 3a         | 3b        | 4       |         |                        | 5    |
| <b>Americas</b>                              |                |            |            |            |           |         |         |                        |      |
| 2022                                         | Brazil         | 3 382 458  | 3 730 243  | 10 114 500 | 3 335 817 | 336 203 | 45 277  | <b>20 944 499</b>      | 12.5 |
| 2027                                         |                | 3 843 453  | 3 491 389  | 12 645 280 | 3 014 572 | 435 512 | 126 639 | <b>23 556 846</b>      |      |
| 2022                                         | Canada         | 1 188 666  | 919 125    | 2 146 775  | 716 166   | 134 254 | 17 720  | <b>5 122 707</b>       | 6.4  |
| 2027                                         |                | 1 341 739  | 877 337    | 2 435 597  | 650 685   | 110 591 | 35 199  | <b>5 451 149</b>       |      |
| 2022                                         | Colombia       | 898 101    | 612 521    | 1 601 180  | 273 497   | 49 124  | 6098    | <b>3 440 522</b>       | 16.9 |
| 2027                                         |                | 1 022 697  | 571 779    | 2 142 613  | 227 197   | 39 934  | 17 004  | <b>4 021 223</b>       |      |
| 2022                                         | Mexico         | 5 861 831  | 4 199 844  | 2 944 663  | 956 664   | 233 149 | 180 129 | <b>14 376 281</b>      | 11.2 |
| 2027                                         |                | 6 797 431  | 3 705 284  | 4 314 933  | 868 726   | 209 321 | 89 987  | <b>15 985 683</b>      |      |
| 2022                                         | USA            | 17 835 056 | 12 754 591 | 14 432 472 | 4 407 547 | 370 093 | 58 447  | <b>49 858 206</b>      | 4.2  |
| 2027                                         |                | 19 884 476 | 11 247 883 | 16 062 028 | 3 977 608 | 623 253 | 171 521 | <b>51 966 771</b>      |      |
| <b>Europe</b>                                |                |            |            |            |           |         |         |                        |      |
| 2022                                         | Belgium        | 347 131    | 281 795    | 659 476    | 257 066   | 94 542  | 15 243  | <b>1 655 253</b>       | 0.3  |
| 2027                                         |                | 386 204    | 256 252    | 732 369    | 211 885   | 54 787  | 19 383  | <b>1 660 881</b>       |      |
| 2022                                         | Denmark        | 177 810    | 144 484    | 353 422    | 113 087   | 19 365  | 2166    | <b>810 335</b>         | -0.4 |
| 2027                                         |                | 200 810    | 131 127    | 380 577    | 79 691    | 11 074  | 4107    | <b>807 387</b>         |      |
| 2022                                         | France         | 2 350 210  | 1 525 888  | 2215 308   | 713 743   | 213 930 | 744 85  | <b>7 093 565</b>       | 6.7  |
| 2027                                         |                | 2 631 722  | 1 283 087  | 2 802 207  | 590 843   | 191 843 | 69 063  | <b>7 568 766</b>       |      |
| 2022                                         | Germany        | 6 984 518  | 1 373 921  | 1 684 581  | 511 074   | 94 390  | 12 145  | <b>10 660 629</b>      | 2.1  |
| 2027                                         |                | 6 723 994  | 1 378 665  | 2 248 226  | 436 279   | 82 330  | 19 589  | <b>10 889 083</b>      |      |
| 2022                                         | Greece         | 167 839    | 204 579    | 651 662    | 141 254   | 26 169  | 3326    | <b>1 194 829</b>       | 3.2  |
| 2027                                         |                | 188 258    | 179 969    | 734 772    | 108 841   | 15 536  | 6024    | <b>1 233 401</b>       |      |
| 2022                                         | Hungary        | 298 411    | 240 395    | 571 230    | 170 340   | 26 028  | 2830    | <b>1 309 234</b>       | -4.3 |
| 2027                                         |                | 321 699    | 206 770    | 601 055    | 105 004   | 12 603  | 5286    | <b>1 252 417</b>       |      |
| 2022                                         | Italy          | 1 242 316  | 772 726    | 1 485 120  | 379 249   | 111 634 | 56 061  | <b>4 047 106</b>       | 8.9  |
| 2027                                         |                | 1 317 372  | 631 008    | 1 977 604  | 363 478   | 78 897  | 38 510  | <b>4 406 869</b>       |      |
| 2022                                         | Netherlands    | 531 041    | 477 658    | 803 327    | 239 544   | 42 378  | 4895    | <b>2 098 843</b>       | 6.2  |
| 2027                                         |                | 593 339    | 432 433    | 993 931    | 172 299   | 27 453  | 8675    | <b>2 228 130</b>       |      |
| 2022                                         | Poland         | 773 400    | 960 191    | 1 724 862  | 500 306   | 81 463  | 9239    | <b>4 049 462</b>       | 4.3  |
| 2027                                         |                | 916 412    | 882 365    | 2 038 342  | 325 147   | 45 193  | 15 643  | <b>4 223 103</b>       |      |
| 2022                                         | Romania        | 263 841    | 232 391    | 712 736    | 112 138   | 12 843  | 1188    | <b>1 335 136</b>       | 17.3 |
| 2027                                         |                | 285 658    | 179 489    | 1 000 945  | 80 289    | 12 284  | 7321    | <b>1 565 985</b>       |      |
| 2022                                         | Spain          | 791 444    | 872 500    | 2 705 692  | 631 210   | 117 072 | 17 651  | <b>5 135 568</b>       | 10.6 |
| 2027                                         |                | 893 732    | 783 582    | 3 234 633  | 640 025   | 93 593  | 33 298  | <b>5 678 863</b>       |      |
| 2022                                         | Sweden         | 233 764    | 196 392    | 358 195    | 112 621   | 28 219  | 16 901  | <b>946 092</b>         | 4.2  |
| 2027                                         |                | 270 340    | 167 666    | 437 067    | 79 490    | 18 123  | 13 196  | <b>985 882</b>         |      |
| 2022                                         | Türkiye        | 4 555 662  | 2 329 183  | 1 696 844  | 1 199 880 | 200 452 | 64 300  | <b>10 046 321</b>      | 7.0  |

| 2027                                              |                  | 5 131 344  | 2 151 851  | 2 464 412  | 772 707   | 190 560 | 42 668  | <b>10 753 542</b>      |      |
|---------------------------------------------------|------------------|------------|------------|------------|-----------|---------|---------|------------------------|------|
| 2022                                              | UK               | 2 055 460  | 1 594 353  | 3 887 259  | 1 343 103 | 249 920 | 33 011  | <b>9 163 106</b>       | 1.1  |
| 2027                                              |                  | 2 277 613  | 1 451 597  | 4 178 943  | 1 127 044 | 179 468 | 52 407  | <b>9 267 073</b>       |      |
| <b>Asia-Pacific/Middle East</b>                   |                  |            |            |            |           |         |         |                        |      |
| 2022                                              | Australia        | 919 290    | 578 290    | 633 818    | 141 386   | 36 338  | 15 523  | <b>2 324 645</b>       | 12.1 |
| 2027                                              |                  | 1 048 919  | 515 238    | 847 898    | 150 768   | 30 460  | 12 823  | <b>2 606 106</b>       |      |
| 2022                                              | China            | 88 782 770 | 13 966 257 | 16 982 472 | 3 070 155 | 725 812 | 233 376 | <b>123 760 844</b>     | 1.5  |
| 2027                                              |                  | 90 928 832 | 13 292 506 | 17 982 359 | 2 973 833 | 374 547 | 123 486 | <b>125 675 563</b>     |      |
| 2022                                              | India            | 49 806 047 | 9 834 515  | 11 834 383 | 3 930 004 | 673 006 | 671 075 | <b>76 749 030</b>      | 7.0  |
| 2027                                              |                  | 54 000 875 | 9 218 592  | 15 936 886 | 2 493 412 | 383 447 | 122 190 | <b>82 155 403</b>      |      |
| 2022                                              | Israel           | 641 816    | 219 959    | 200 088    | 71 511    | 32 146  | 5984    | <b>1 171 505</b>       | 7.0  |
| 2027                                              |                  | 715 533    | 216 512    | 243 950    | 54 732    | 16 850  | 5729    | <b>1 253 305</b>       |      |
| 2022                                              | Japan            | 2 737 632  | 7 944 141  | 6 823 351  | 5 411 187 | 631 876 | 45 341  | <b>23 593 527</b>      | 6.1  |
| 2027                                              |                  | 3 146 006  | 6 860 559  | 10 610 404 | 3 480 895 | 811 396 | 118 604 | <b>25 027 864</b>      |      |
| 2022                                              | Philippines      | 2 119 469  | 1 045 760  | 2 422 282  | 427 649   | 103 349 | 34 235  | <b>6 152 744</b>       | 12.3 |
| 2027                                              |                  | 2 411 704  | 955 075    | 2 967 006  | 483 746   | 62 990  | 26 290  | <b>6 906 811</b>       |      |
| 2022                                              | Saudi Arabia     | 1 481 681  | 941 397    | 1 382 497  | 369 203   | 121 747 | 106 321 | <b>4 402 846</b>       | 20.1 |
| 2027                                              |                  | 1 755 905  | 925 010    | 1 866 359  | 455 998   | 142 236 | 141 487 | <b>5 286 995</b>       |      |
| 2022                                              | Singapore        | 348 517    | 228 422    | 290 509    | 55 905    | 15 879  | 5308    | <b>944 539</b>         | 12.3 |
| 2027                                              |                  | 386 639    | 229 016    | 351 054    | 74 639    | 13 228  | 5838    | <b>1 060 413</b>       |      |
| 2022                                              | South Korea      | 2 356 592  | 1 450 976  | 1 326 627  | 319 296   | 83 251  | 11 202  | <b>5 547 944</b>       | 19.5 |
| 2027                                              |                  | 2 532 936  | 1 316 288  | 2 269 665  | 367 289   | 113 378 | 32 891  | <b>6 632 448</b>       |      |
| 2022                                              | Taiwan           | 1 084 714  | 657 427    | 606 602    | 146 133   | 37 125  | 4996    | <b>2 536 997</b>       | 17.7 |
| 2027                                              |                  | 1 155 246  | 580 804    | 1 026 249  | 161 665   | 47 940  | 13 531  | <b>2 985 437</b>       |      |
| 2022                                              | Thailand         | 1 701 041  | 2 495 584  | 6 055 902  | 1 569 747 | 272 185 | 144 565 | <b>12 239 024</b>      | 8.9  |
| 2027                                              |                  | 1 952 640  | 2 264 514  | 6 672 540  | 1 898 435 | 350 670 | 189 518 | <b>13 328 317</b>      |      |
| 2022                                              | UAE (Emirati)    | 63 171     | 40 200     | 56 692     | 13 071    | 4997    | 3933    | <b>182 065</b>         | 23.9 |
| 2027                                              |                  | 76 516     | 45 733     | 80 043     | 13 566    | 5847    | 3961    | <b>225 665</b>         |      |
| 2022                                              | UAE (Expatriate) | 357 688    | 30 190     | 25 460     | 3392      | 469     | 561     | <b>417 760</b>         | 9.5  |
| 2027                                              |                  | 373 320    | 30 923     | 48 924     | 3178      | 830     | 252     | <b>457 427</b>         |      |
| <b>CKD prevalence per 100 000 (including KRT)</b> |                  |            |            |            |           |         |         |                        |      |
| Year                                              | Country/region   | CKD stage  |            |            |           |         | TOTAL   | % change<br>2022–2027* |      |
|                                                   |                  | 1          | 2          | 3a         | 3b        | 4       |         |                        | 5    |
| <b>Americas</b>                                   |                  |            |            |            |           |         |         |                        |      |
| 2022                                              | Brazil           | 1571       | 1732       | 4697       | 1549      | 156     | 21      | <b>9726</b>            | 9.5  |
| 2027                                              |                  | 1738       | 1579       | 5718       | 1363      | 197     | 57      | <b>10 652</b>          |      |
| 2022                                              | Canada           | 3096       | 2394       | 5592       | 1866      | 350     | 46      | <b>13 344</b>          | 2.3  |
| 2027                                              |                  | 3359       | 2197       | 6098       | 1629      | 277     | 88      | <b>13 649</b>          |      |
| 2022                                              | Colombia         | 1743       | 1189       | 3108       | 531       | 95      | 12      | <b>6679</b>            | 14.6 |
| 2027                                              |                  | 1947       | 1088       | 4079       | 433       | 76      | 32      | <b>7655</b>            |      |
| 2022                                              | Mexico           | 4456       | 3192       | 2238       | 727       | 177     | 137     | <b>10 927</b>          | 6.3  |
| 2027                                              |                  | 4940       | 2693       | 3136       | 631       | 152     | 65      | <b>11 617</b>          |      |
| 2022                                              | USA              | 5327       | 3810       | 4311       | 1316      | 111     | 17      | <b>14 892</b>          | 1.4  |
| 2027                                              |                  | 5779       | 3269       | 4668       | 1156      | 181     | 50      | <b>15 102</b>          |      |
| <b>Europe</b>                                     |                  |            |            |            |           |         |         |                        |      |

|                                 |              |      |      |      |      |     |     |        |      |
|---------------------------------|--------------|------|------|------|------|-----|-----|--------|------|
| 2022                            | Belgium      | 2975 | 2415 | 5652 | 2203 | 810 | 131 | 14 186 | -0.9 |
| 2027                            |              | 3268 | 2168 | 6198 | 1793 | 464 | 164 | 14 055 |      |
| 2022                            | Denmark      | 3047 | 2476 | 6057 | 1938 | 332 | 37  | 13 888 | -2.2 |
| 2027                            |              | 3379 | 2207 | 6404 | 1341 | 186 | 69  | 13 586 |      |
| 2022                            | France       | 3583 | 2327 | 3378 | 1088 | 326 | 114 | 10 816 | 5.5  |
| 2027                            |              | 3968 | 1935 | 4225 | 891  | 289 | 104 | 11 412 |      |
| 2022                            | Germany      | 8326 | 1638 | 2008 | 609  | 113 | 14  | 12 709 | 2.8  |
| 2027                            |              | 8068 | 1654 | 2697 | 523  | 99  | 24  | 13 065 |      |
| 2022                            | Greece       | 1627 | 1983 | 6317 | 1369 | 254 | 32  | 11 582 | 5.9  |
| 2027                            |              | 1872 | 1790 | 7308 | 1082 | 155 | 60  | 12 267 |      |
| 2022                            | Hungary      | 3106 | 2502 | 5946 | 1773 | 271 | 29  | 13 629 | -2.7 |
| 2027                            |              | 3405 | 2189 | 6362 | 1111 | 133 | 56  | 13 256 |      |
| 2022                            | Italy        | 2061 | 1282 | 2464 | 629  | 185 | 93  | 6716   | 10.2 |
| 2027                            |              | 2212 | 1060 | 3321 | 610  | 132 | 65  | 7400   |      |
| 2022                            | Netherlands  | 3085 | 2775 | 4667 | 1392 | 246 | 28  | 12 194 | 5.1  |
| 2027                            |              | 3414 | 2488 | 5719 | 991  | 158 | 50  | 12 820 |      |
| 2022                            | Poland       | 2049 | 2544 | 4570 | 1326 | 216 | 24  | 10 730 | 5.5  |
| 2027                            |              | 2456 | 2365 | 5463 | 871  | 121 | 42  | 11 317 |      |
| 2022                            | Romania      | 1386 | 1221 | 3745 | 589  | 67  | 6   | 7016   | 20.1 |
| 2027                            |              | 1537 | 965  | 5384 | 432  | 66  | 39  | 8424   |      |
| 2022                            | Spain        | 1653 | 1823 | 5653 | 1319 | 245 | 37  | 10729  | 9.1  |
| 2027                            |              | 1843 | 1616 | 6670 | 1320 | 193 | 69  | 11 711 |      |
| 2022                            | Sweden       | 2288 | 1922 | 3505 | 1102 | 276 | 165 | 9258   | 1.5  |
| 2027                            |              | 2578 | 1599 | 4167 | 758  | 173 | 126 | 9400   |      |
| 2022                            | Türkiye      | 5324 | 2722 | 1983 | 1402 | 234 | 75  | 11 742 | 4.5  |
| 2027                            |              | 5857 | 2456 | 2813 | 882  | 218 | 49  | 12 274 |      |
| 2022                            | UK           | 3001 | 2328 | 5675 | 1961 | 365 | 48  | 13 377 | -0.7 |
| 2027                            |              | 3264 | 2080 | 5989 | 1615 | 257 | 75  | 13 282 |      |
| <b>Asia-Pacific/Middle East</b> |              |      |      |      |      |     |     |        |      |
| 2022                            | Australia    | 3526 | 2218 | 2431 | 542  | 139 | 60  | 8917   | 6.6  |
| 2027                            |              | 3827 | 1880 | 3094 | 550  | 111 | 47  | 9509   |      |
| 2022                            | China        | 6129 | 964  | 1172 | 212  | 50  | 16  | 8544   | 0.6  |
| 2027                            |              | 6220 | 909  | 1230 | 203  | 26  | 8   | 8597   |      |
| 2022                            | India        | 3541 | 699  | 841  | 279  | 48  | 48  | 5456   | 2.5  |
| 2027                            |              | 3675 | 627  | 1085 | 170  | 26  | 8   | 5591   |      |
| 2022                            | Israel       | 7193 | 2465 | 2242 | 801  | 360 | 67  | 13 129 | -0.4 |
| 2027                            |              | 7467 | 2259 | 2546 | 571  | 176 | 60  | 13 079 |      |
| 2022                            | Japan        | 2180 | 6326 | 5433 | 4309 | 503 | 36  | 18 787 | 8.5  |
| 2027                            |              | 2563 | 5589 | 8644 | 2836 | 661 | 97  | 20 388 |      |
| 2022                            | Philippines  | 1884 | 929  | 2153 | 380  | 92  | 30  | 5469   | 5.6  |
| 2027                            |              | 2016 | 798  | 2480 | 404  | 53  | 22  | 5773   |      |
| 2022                            | Saudi Arabia | 4134 | 2626 | 3857 | 1030 | 340 | 297 | 12 283 | 12.9 |
| 2027                            |              | 4607 | 2427 | 4897 | 1196 | 373 | 371 | 13 871 |      |
| 2022                            | Singapore    | 5864 | 3843 | 4888 | 941  | 267 | 89  | 15 892 | 8.3  |
| 2027                            |              | 6278 | 3719 | 5700 | 1212 | 215 | 95  | 17 219 |      |
| 2022                            | South Korea  | 4591 | 2827 | 2585 | 622  | 162 | 22  | 10 808 | 19.6 |

|      |                  |      |      |      |      |     |     |               |      |
|------|------------------|------|------|------|------|-----|-----|---------------|------|
| 2027 |                  | 4938 | 2566 | 4425 | 716  | 221 | 64  | <b>12 930</b> |      |
| 2022 | Taiwan           | 4541 | 2752 | 2539 | 612  | 155 | 21  | <b>10 620</b> | 17.1 |
| 2027 |                  | 4814 | 2420 | 4276 | 674  | 200 | 56  | <b>12 441</b> |      |
| 2022 | Thailand         | 2427 | 3561 | 8642 | 2240 | 388 | 206 | <b>17 465</b> | 8.4  |
| 2027 |                  | 2774 | 3217 | 9479 | 2697 | 498 | 269 | <b>18 934</b> |      |
| 2022 | UAE (Emirati)    | 3937 | 2505 | 3533 | 815  | 311 | 245 | <b>11 345</b> | 13.7 |
| 2027 |                  | 4373 | 2614 | 4575 | 775  | 334 | 226 | <b>12 898</b> |      |
| 2022 | UAE (Expatriate) | 4391 | 371  | 313  | 42   | 6   | 7   | <b>5128</b>   | 6.7  |
| 2027 |                  | 4467 | 370  | 585  | 38   | 10  | 3   | <b>5473</b>   |      |

CKD=chronic kidney disease. KRT=kidney replacement therapy.



**Table S6: KRT prevalence per 100 000 (given for all modalities of treatment) in 2022 and 2027**

| KRT prevalence per 100 000 |                |               |                     |                        |       |                     |
|----------------------------|----------------|---------------|---------------------|------------------------|-------|---------------------|
| Year                       | Country/region | KRT modality  |                     |                        | TOTAL | % change 2022–2027* |
|                            |                | Haemodialysis | Peritoneal dialysis | Kidney transplantation |       |                     |
| <b>Americas</b>            |                |               |                     |                        |       |                     |
| 2022                       | Brazil         | 67            | 5                   | 25                     | 97    | 22.2                |
| 2027                       |                | 85            | 8                   | 26                     | 119   |                     |
| 2022                       | Canada         | 49            | 13                  | 50                     | 112   | 7.5                 |
| 2027                       |                | 56            | 15                  | 49                     | 120   |                     |
| 2022                       | Colombia       | 50            | 18                  | 17                     | 85    | 12.9                |
| 2027                       |                | 56            | 22                  | 19                     | 96    |                     |
| 2022                       | Mexico         | 68            | 47                  | 72                     | 187   | 6.1                 |
| 2027                       |                | 80            | 47                  | 71                     | 198   |                     |
| 2022                       | USA            | 153           | 18                  | 74                     | 245   | 1.5                 |
| 2027                       |                | 155           | 19                  | 74                     | 248   |                     |
| <b>Europe</b>              |                |               |                     |                        |       |                     |
| 2022                       | Belgium        | 68            | 5                   | 63                     | 137   | 10.7                |
| 2027                       |                | 76            | 6                   | 70                     | 151   |                     |
| 2022                       | Denmark        | 37            | 9                   | 55                     | 101   | 15.6                |
| 2027                       |                | 45            | 13                  | 59                     | 117   |                     |
| 2022                       | France         | 83            | 5                   | 67                     | 155   | 22.3                |
| 2027                       |                | 106           | 7                   | 77                     | 190   |                     |
| 2022                       | Germany        | 75            | 4                   | 30                     | 108   | 4.8                 |
| 2027                       |                | 79            | 4                   | 31                     | 114   |                     |
| 2022                       | Greece         | 112           | 6                   | 34                     | 152   | 15.2                |
| 2027                       |                | 133           | 7                   | 35                     | 175   |                     |
| 2022                       | Hungary        | 79            | 12                  | 120                    | 211   | 12.0                |
| 2027                       |                | 84            | 13                  | 139                    | 236   |                     |
| 2022                       | Italy          | 71            | 9                   | 53                     | 132   | 5.2                 |
| 2027                       |                | 73            | 10                  | 56                     | 139   |                     |
| 2022                       | Netherlands    | 30            | 6                   | 76                     | 112   | 5.0                 |
| 2027                       |                | 34            | 8                   | 76                     | 118   |                     |
| 2022                       | Poland         | 78            | 3                   | 34                     | 115   | 22.3                |
| 2027                       |                | 98            | 5                   | 38                     | 140   |                     |
| 2022                       | Romania        | 74            | 2                   | 12                     | 88    | 27.5                |
| 2027                       |                | 90            | 2                   | 20                     | 112   |                     |
| 2022                       | Spain          | 53            | 7                   | 68                     | 127   | 13.2                |
| 2027                       |                | 62            | 9                   | 73                     | 144   |                     |
| 2022                       | Sweden         | 30            | 8                   | 65                     | 104   | 11.5                |
| 2027                       |                | 33            | 9                   | 73                     | 116   |                     |
| 2022                       | Türkiye        | 69            | 3                   | 29                     | 102   | 13.2                |
| 2027                       |                | 82            | 5                   | 29                     | 116   |                     |
| 2022                       | UK             | 38            | 4                   | 62                     | 104   | 7.7                 |

|                                 |                  |     |    |    |            |      |
|---------------------------------|------------------|-----|----|----|------------|------|
| 2027                            |                  | 44  | 7  | 62 | <b>112</b> |      |
| <b>Asia-Pacific/Middle East</b> |                  |     |    |    |            |      |
| 2022                            |                  | 45  | 10 | 51 | <b>106</b> |      |
| 2027                            | Australia        | 48  | 11 | 50 | <b>110</b> | 3.3  |
| 2022                            |                  | 49  | 5  | 9  | <b>62</b>  |      |
| 2027                            | China            | 51  | 5  | 9  | <b>65</b>  | 4.9  |
| 2022                            |                  | 14  | 1  | 9  | <b>24</b>  |      |
| 2027                            | India            | 13  | 1  | 9  | <b>23</b>  | -2.7 |
| 2022                            |                  | 70  | 6  | 7  | <b>84</b>  |      |
| 2027                            | Israel           | 70  | 6  | 9  | <b>85</b>  | 1.8  |
| 2022                            |                  | 272 | 8  | 10 | <b>290</b> |      |
| 2027                            | Japan            | 301 | 9  | 12 | <b>321</b> | 10.6 |
| 2022                            |                  | 50  | 2  | 1  | <b>52</b>  |      |
| 2027                            | Philippines      | 54  | 2  | 1  | <b>57</b>  | 8.1  |
| 2022                            |                  | 73  | 7  | 30 | <b>110</b> |      |
| 2027                            | Saudi Arabia     | 111 | 13 | 72 | <b>196</b> | 77.4 |
| 2022                            |                  | 122 | 21 | 30 | <b>173</b> |      |
| 2027                            | Singapore        | 143 | 27 | 33 | <b>203</b> | 17.3 |
| 2022                            |                  | 180 | 11 | 44 | <b>236</b> |      |
| 2027                            | South Korea      | 207 | 12 | 49 | <b>268</b> | 13.8 |
| 2022                            |                  | 358 | 31 | 16 | <b>405</b> |      |
| 2027                            | Taiwan           | 381 | 34 | 17 | <b>432</b> | 6.6  |
| 2022                            |                  | 234 | 61 | 14 | <b>309</b> |      |
| 2027                            | Thailand         | 295 | 75 | 23 | <b>393</b> | 27.2 |
| 2022                            |                  | 154 | 12 | 43 | <b>209</b> |      |
| 2027                            | UAE (Emirati)    | 170 | 12 | 67 | <b>250</b> | 19.6 |
| 2022                            |                  | 1   | 0  | 0  | <b>1</b>   |      |
| 2027                            | UAE (Expatriate) | 2   | 0  | 0  | <b>2</b>   | 75.3 |

KRT=kidney replacement therapy. Note: individual values have been rounded to whole numbers. Slight discrepancies may occur between the total sum reported as a result.

## Supplementary data appendix 1: sensitivity analysis on diagnosis rates

**Australia:** Prevalence of CKD following sensitivity analysis on diagnosis rates in which a 10% increase and decrease was applied to the diagnosis rate. Breakdowns by total, undiagnosed and diagnosed CKD are provided. The error bars represent the  $\pm 10\%$  difference in diagnosis rate.

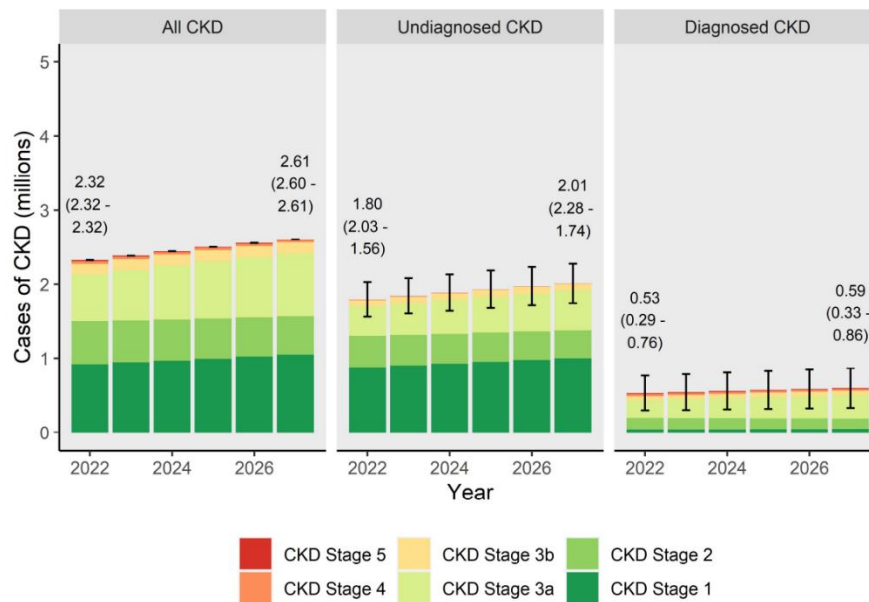

**Belgium:** Prevalence of CKD following sensitivity analysis on diagnosis rates in which a 10% increase and decrease was applied to the diagnosis rate. Breakdowns by total, undiagnosed and diagnosed CKD are provided. The error bars represent the  $\pm 10\%$  difference in diagnosis rate.

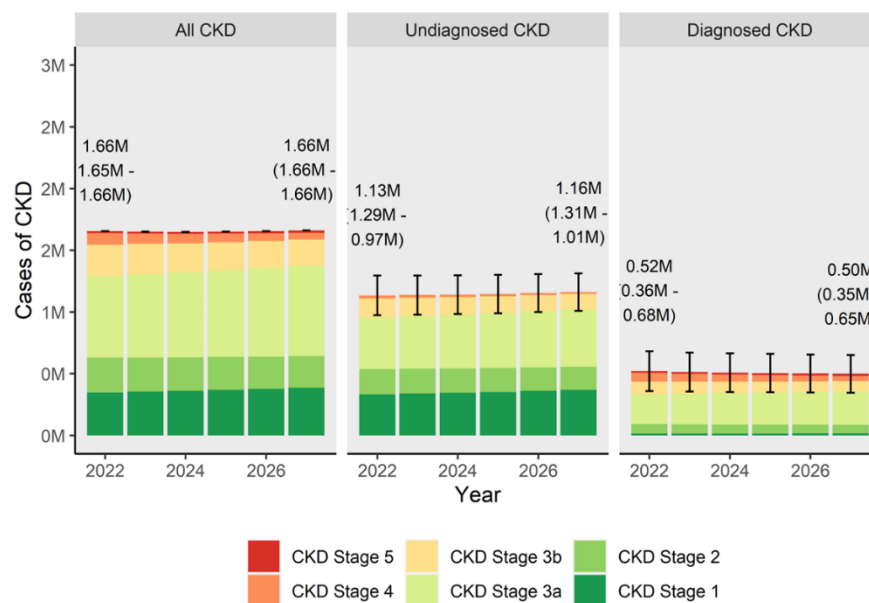

**Brazil:** Prevalence of CKD following sensitivity analysis on diagnosis rates in which a 10% increase and decrease was applied to the diagnosis rate. Breakdowns by total, undiagnosed and diagnosed CKD are provided. The error bars represent the  $\pm 10\%$  difference in diagnosis rate.

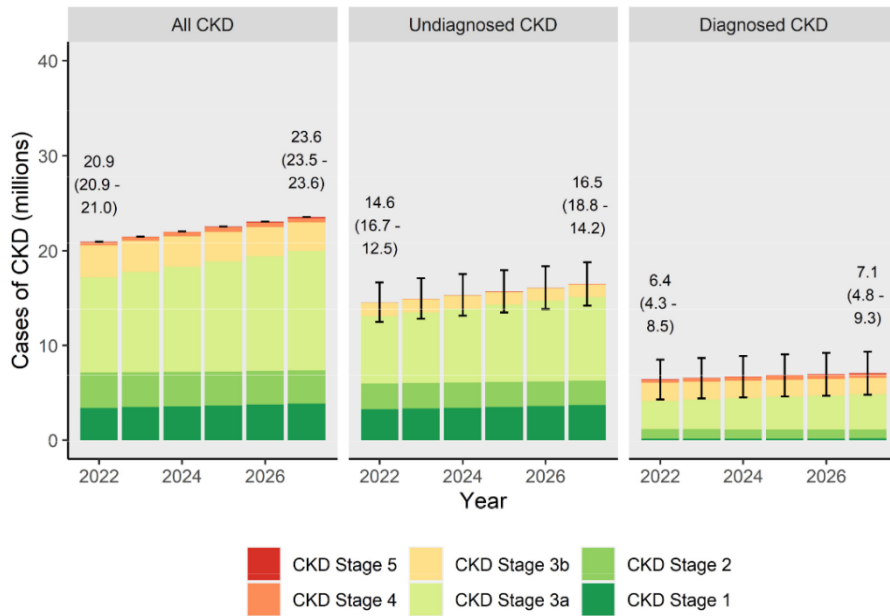

**Canada:** Prevalence of CKD following sensitivity analysis on diagnosis rates in which a 10% increase and decrease was applied to the diagnosis rate. Breakdowns by total, undiagnosed and diagnosed CKD are provided. The error bars represent the  $\pm 10\%$  difference in diagnosis rate.

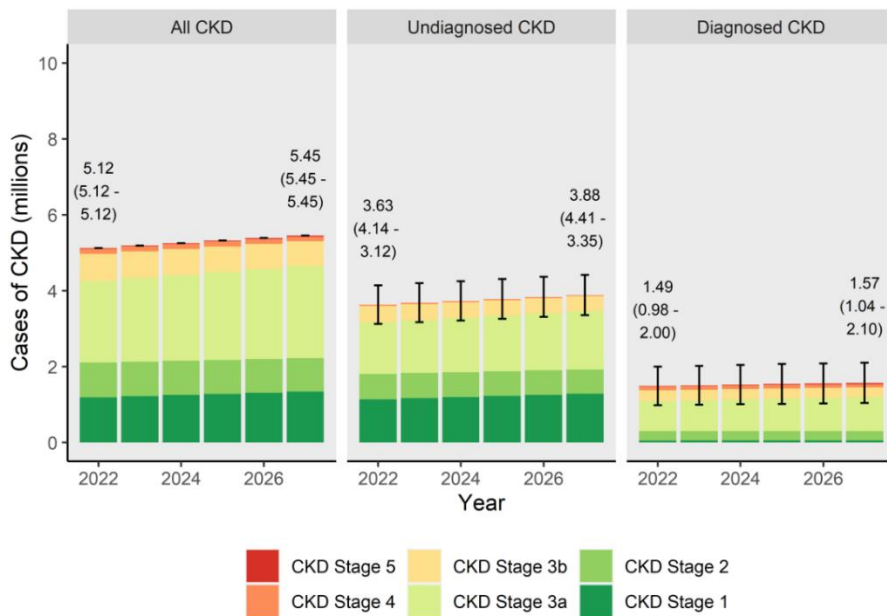

**China:** Prevalence of CKD following sensitivity analysis on diagnosis rates in which a 10% increase and decrease was applied to the diagnosis rate. Breakdowns by total, undiagnosed and diagnosed CKD are provided. The error bars represent the  $\pm 10\%$  difference in diagnosis rate.

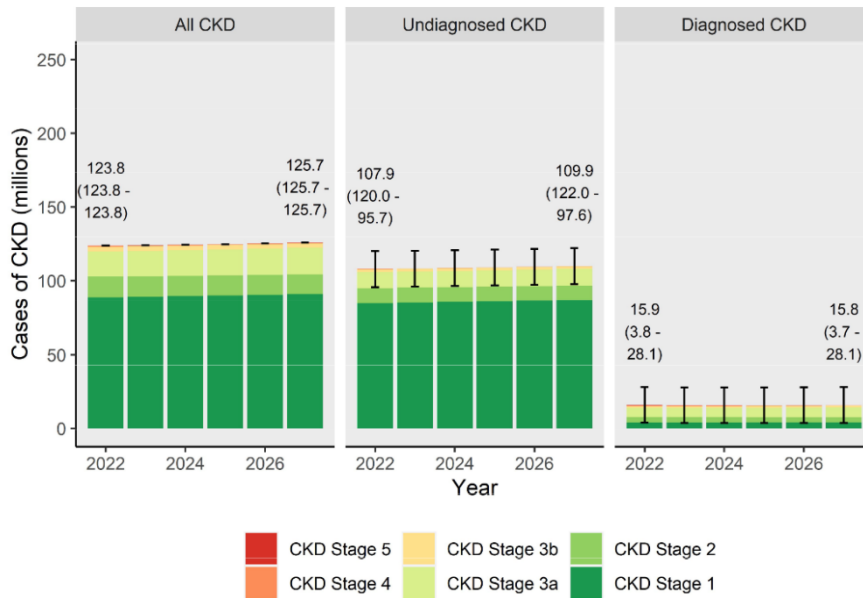

**Colombia:** Prevalence of CKD following sensitivity analysis on diagnosis rates in which a 10% increase and decrease was applied to the diagnosis rate. Breakdowns by total, undiagnosed and diagnosed CKD are provided. The error bars represent the  $\pm 10\%$  difference in diagnosis rate.

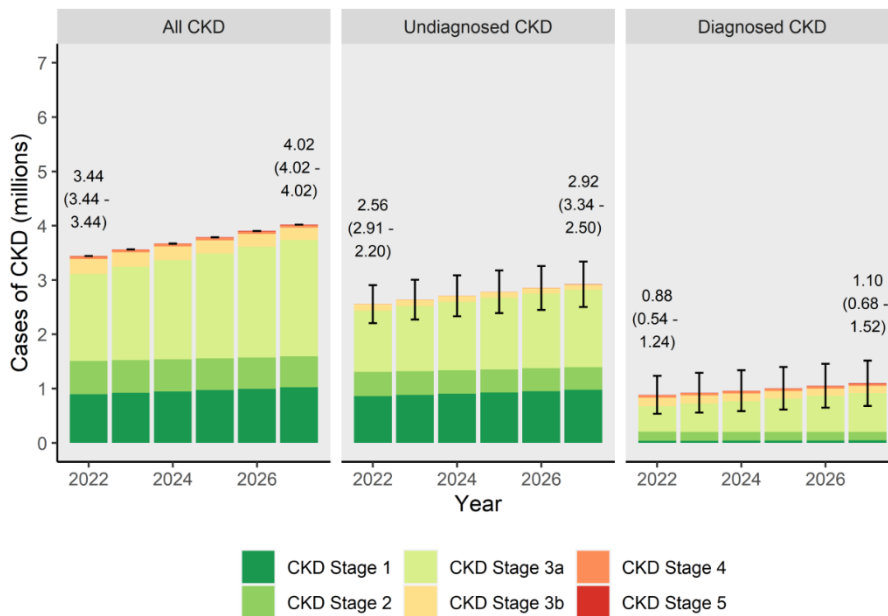

**Denmark:** Prevalence of CKD following sensitivity analysis on diagnosis rates in which a 10% increase and decrease was applied to the diagnosis rate. Breakdowns by total, undiagnosed and diagnosed CKD are provided. The error bars represent the  $\pm 10\%$  difference in diagnosis rate.

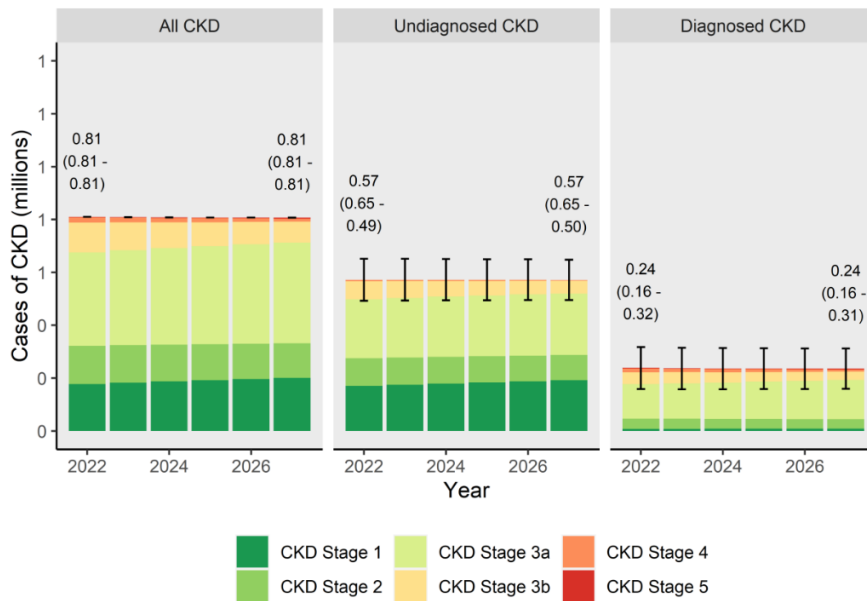

**France:** Prevalence of CKD following sensitivity analysis on diagnosis rates in which a 10% increase and decrease was applied to the diagnosis rate. Breakdowns by total, undiagnosed and diagnosed CKD are provided. The error bars represent the  $\pm 10\%$  difference in diagnosis rate.

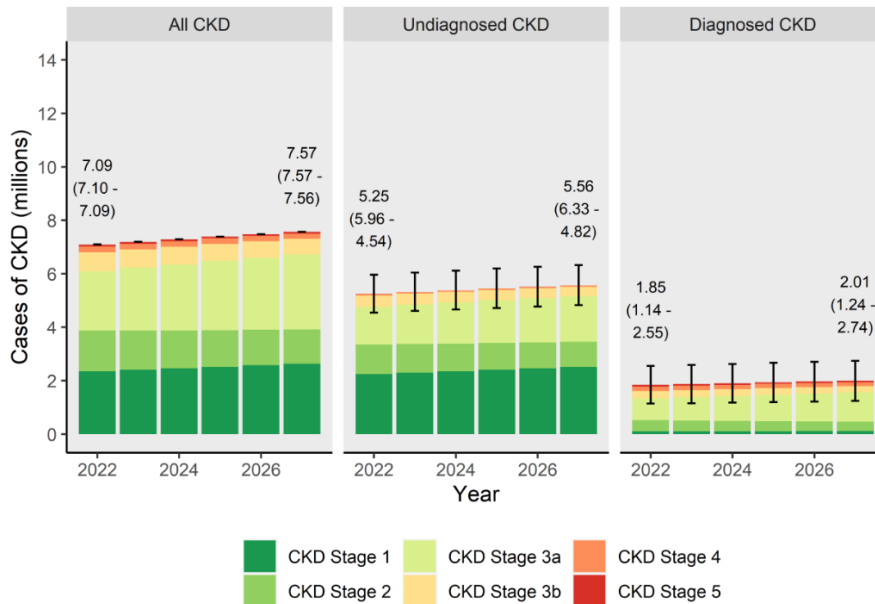

**Germany:** Prevalence of CKD following sensitivity analysis on diagnosis rates in which a 10% increase and decrease was applied to the diagnosis rate. Breakdowns by total, undiagnosed and diagnosed CKD are provided. The error bars represent the  $\pm 10\%$  difference in diagnosis rate.

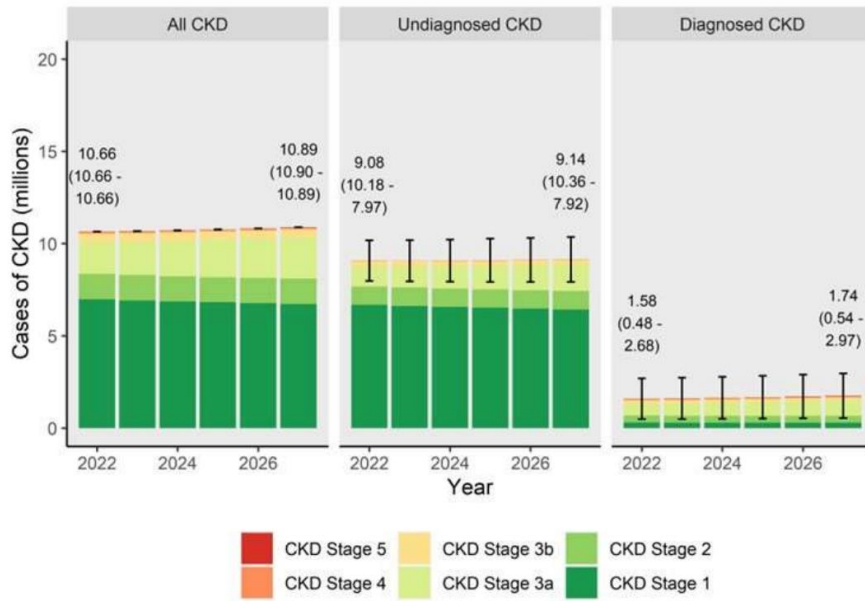

**Greece:** Prevalence of CKD following sensitivity analysis on diagnosis rates in which a 10% increase and decrease was applied to the diagnosis rate. Breakdowns by total, undiagnosed and diagnosed CKD are provided. The error bars represent the  $\pm 10\%$  difference in diagnosis rate.

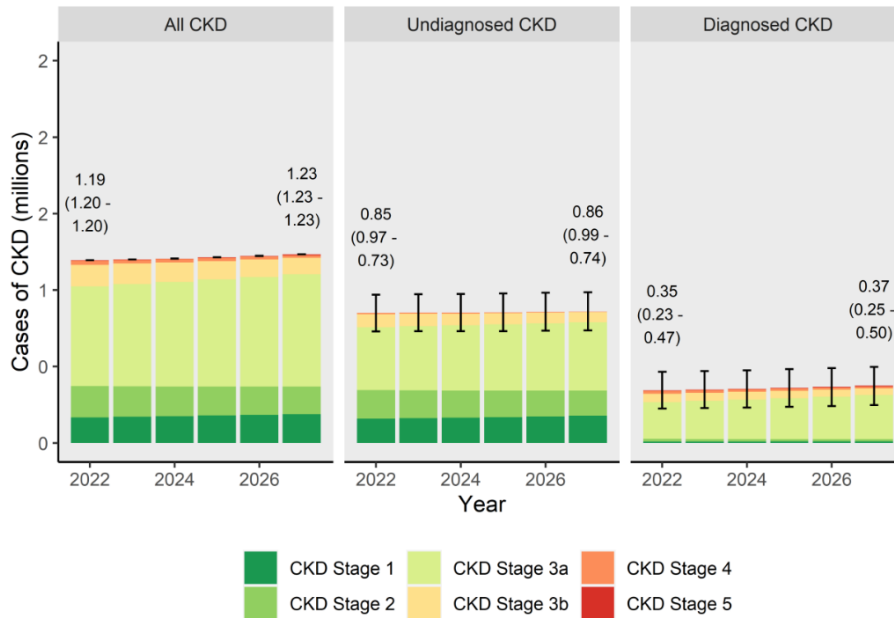

**Hungary:** Prevalence of CKD following sensitivity analysis on diagnosis rates in which a 10% increase and decrease was applied to the diagnosis rate. Breakdowns by total, undiagnosed and diagnosed CKD are provided. The error bars represent the  $\pm 10\%$  difference in diagnosis rate.

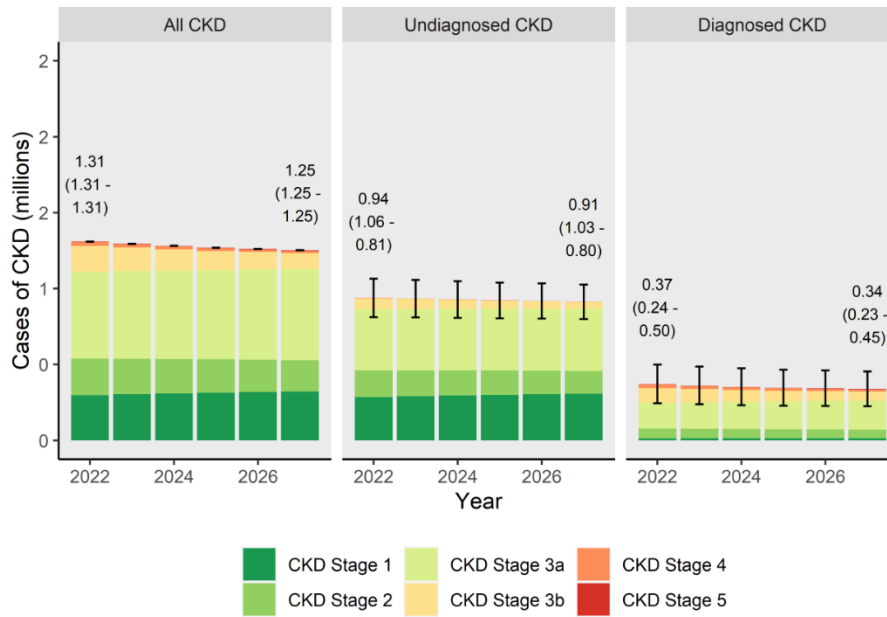

**India:** Prevalence of CKD following sensitivity analysis on diagnosis rates in which a 10% increase and decrease was applied to the diagnosis rate. Breakdowns by total, undiagnosed and diagnosed CKD are provided. The error bars represent the  $\pm 10\%$  difference in diagnosis rate.

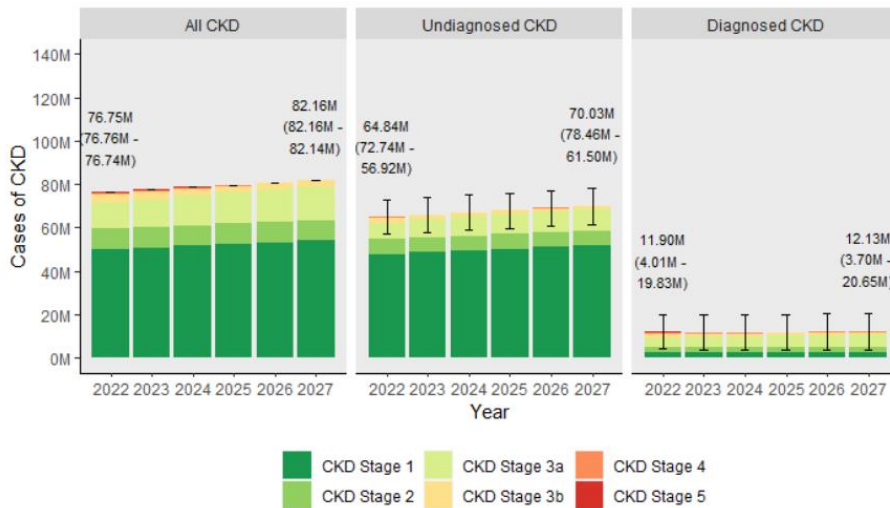



**Israel:** Prevalence of CKD following sensitivity analysis on diagnosis rates in which a 10% increase and decrease was applied to the diagnosis rate. Breakdowns by total, undiagnosed and diagnosed CKD are provided. The error bars represent the  $\pm 10\%$  difference in diagnosis rate.

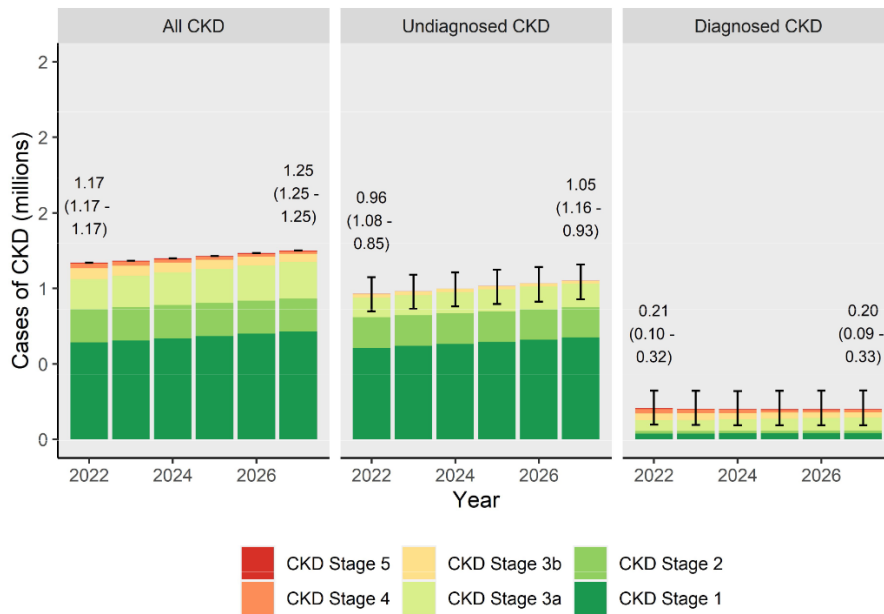

**Italy:** Prevalence of CKD following sensitivity analysis on diagnosis rates in which a 10% increase and decrease was applied to the diagnosis rate. Breakdowns by total, undiagnosed and diagnosed CKD are provided. The error bars represent the  $\pm 10\%$  difference in diagnosis rate.

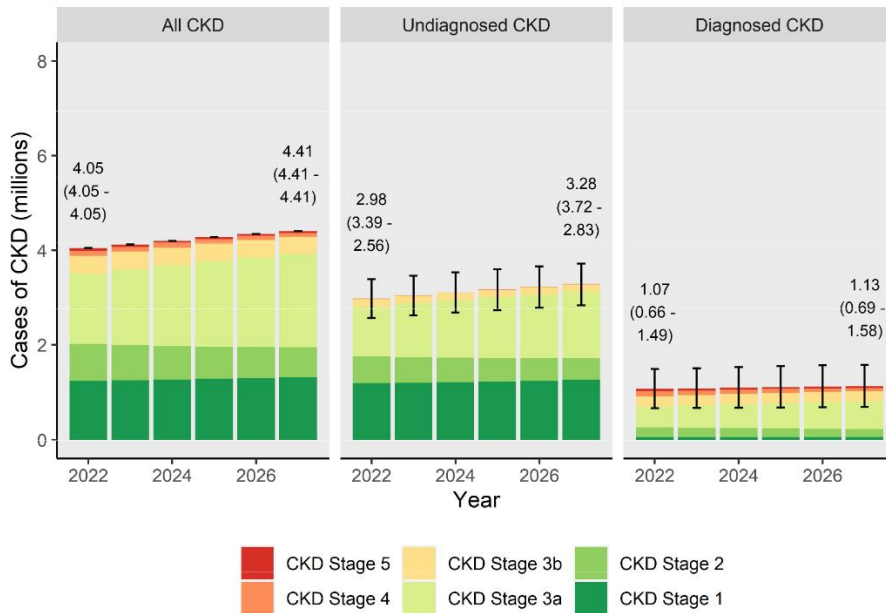

**Japan:** Prevalence of CKD following sensitivity analysis on diagnosis rates in which a 10% increase and decrease was applied to the diagnosis rate. Breakdowns by total, undiagnosed and diagnosed CKD are provided. The error bars represent the  $\pm 10\%$  difference in diagnosis rate.

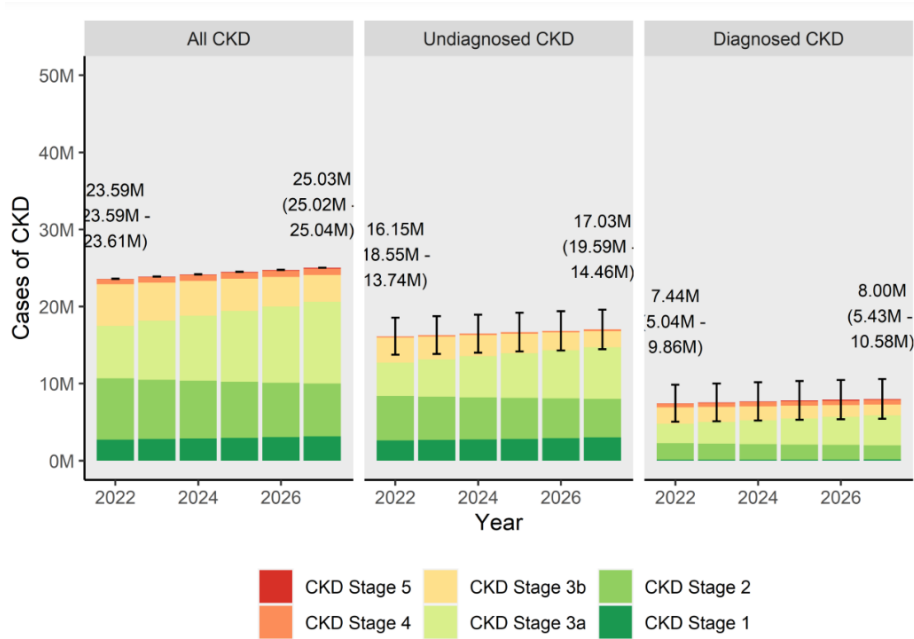

**Mexico:** Prevalence of CKD following sensitivity analysis on diagnosis rates in which a 10% increase and decrease was applied to the diagnosis rate. Breakdowns by total, undiagnosed and diagnosed CKD are provided. The error bars represent the  $\pm 10\%$  difference in diagnosis rate.

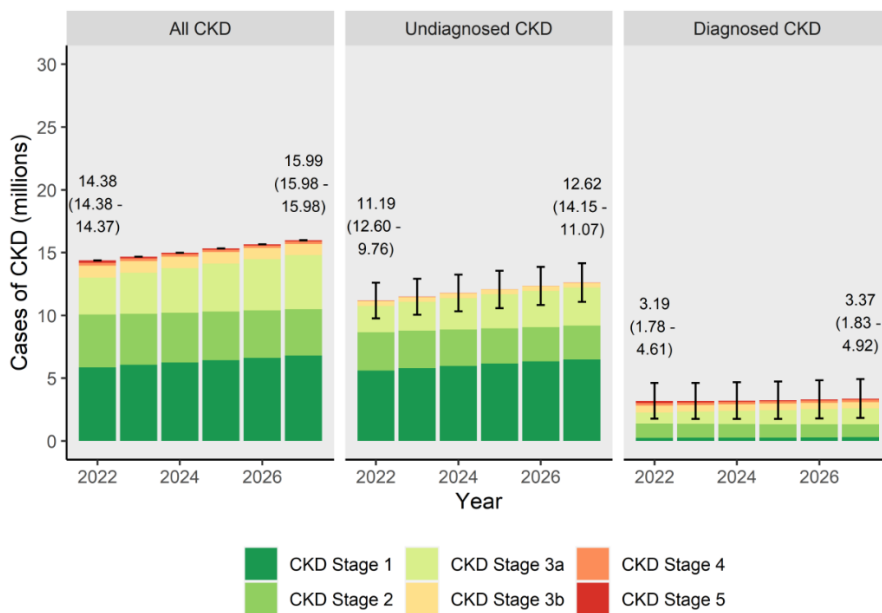

**Netherlands:** Prevalence of CKD following sensitivity analysis on diagnosis rates in which a 10% increase and decrease was applied to the diagnosis rate. Breakdowns by total, undiagnosed and diagnosed CKD are provided. The error bars represent the  $\pm 10\%$  difference in diagnosis rate.

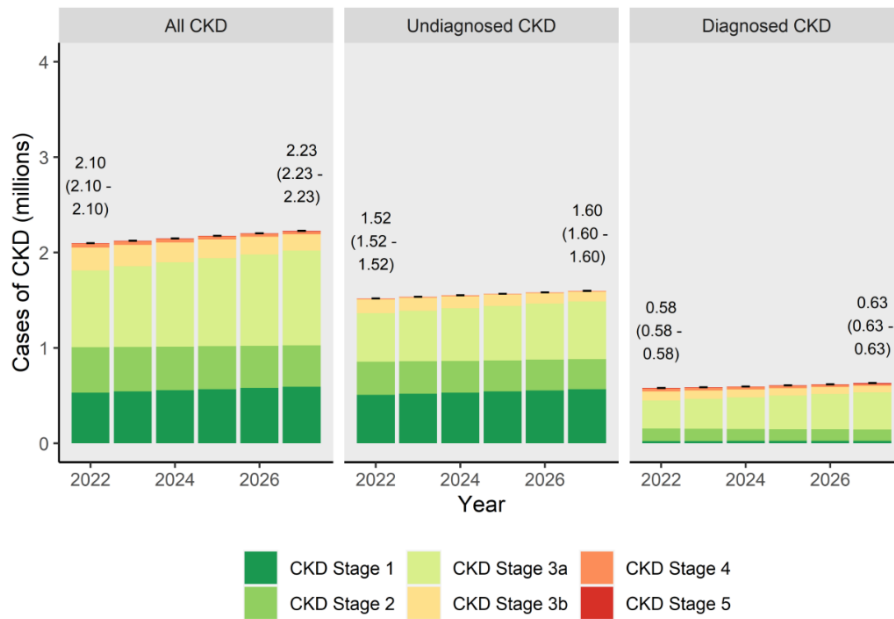

**Philippines:** Prevalence of CKD following sensitivity analysis on diagnosis rates in which a 10% increase and decrease was applied to the diagnosis rate. Breakdowns by total, undiagnosed and diagnosed CKD are provided. The error bars represent the  $\pm 10\%$  difference in diagnosis rate.

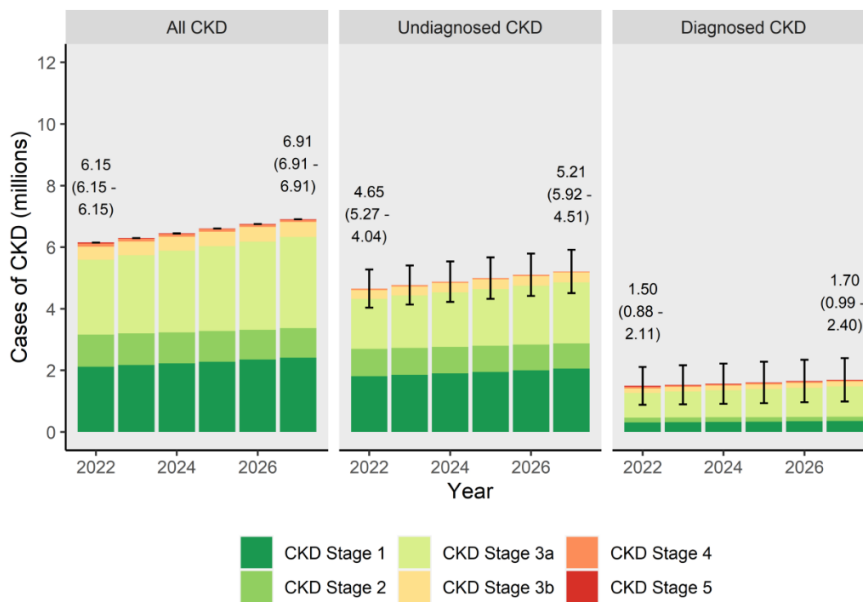

**Poland:** Prevalence of CKD following sensitivity analysis on diagnosis rates in which a 10% increase and decrease was applied to the diagnosis rate. Breakdowns by total, undiagnosed and diagnosed CKD are provided. The error bars represent the  $\pm 10\%$  difference in diagnosis rate.

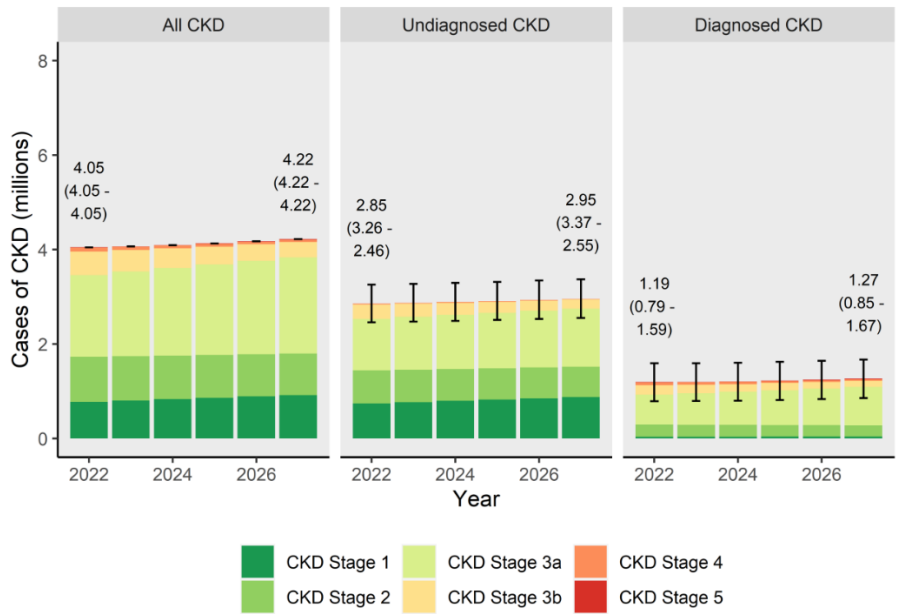

**Romania:** Prevalence of CKD following sensitivity analysis on diagnosis rates in which a 10% increase and decrease was applied to the diagnosis rate. Breakdowns by total, undiagnosed and diagnosed CKD are provided. The error bars represent the  $\pm 10\%$  difference in diagnosis rate.

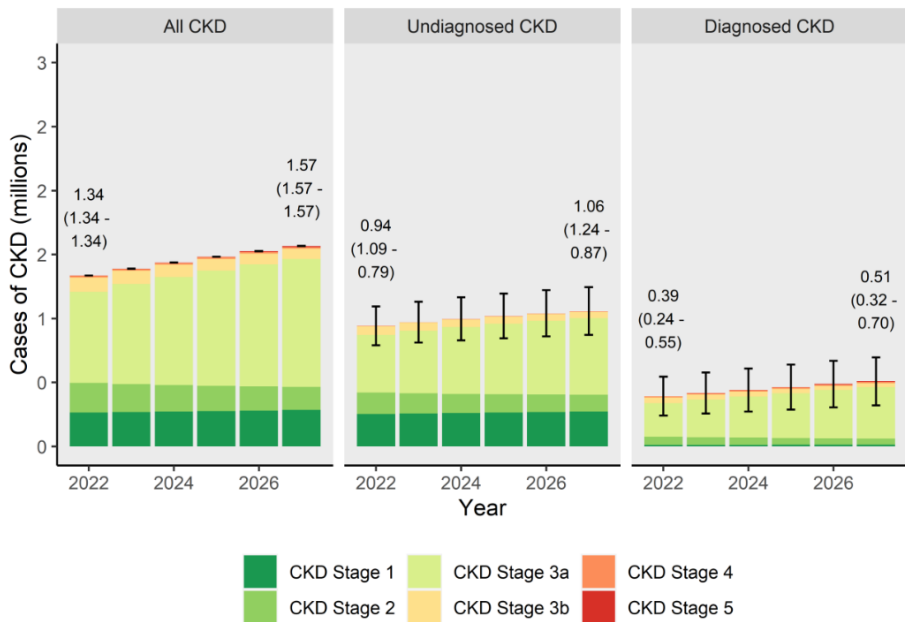

**Saudi Arabia:** Prevalence of CKD following sensitivity analysis on diagnosis rates in which a 10% increase and decrease was applied to the diagnosis rate. Breakdowns by total, undiagnosed and diagnosed CKD are provided. The error bars represent the  $\pm 10\%$  difference in diagnosis rate.

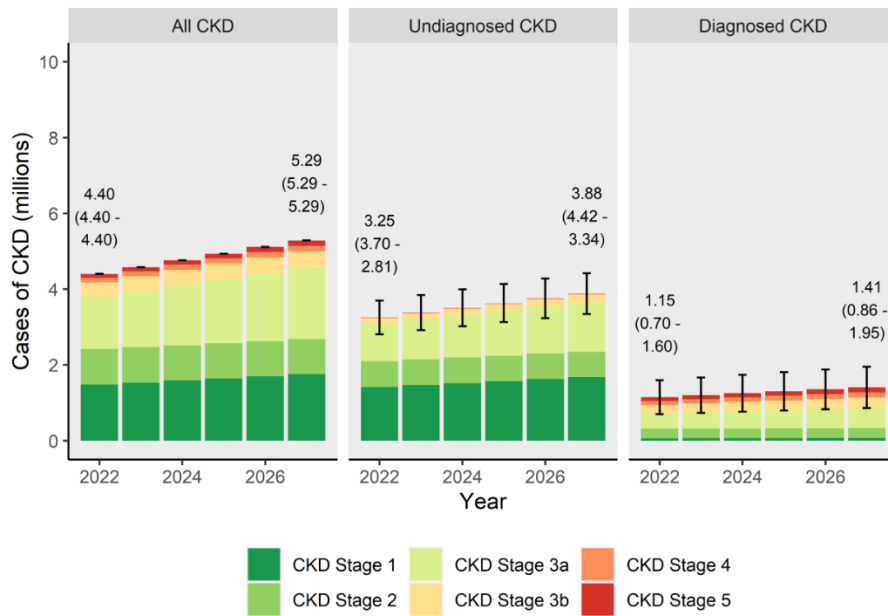

**Singapore:** Prevalence of CKD following sensitivity analysis on diagnosis rates in which a 10% increase and decrease was applied to the diagnosis rate. Breakdowns by total, undiagnosed and diagnosed CKD are provided. The error bars represent the  $\pm 10\%$  difference in diagnosis rate.

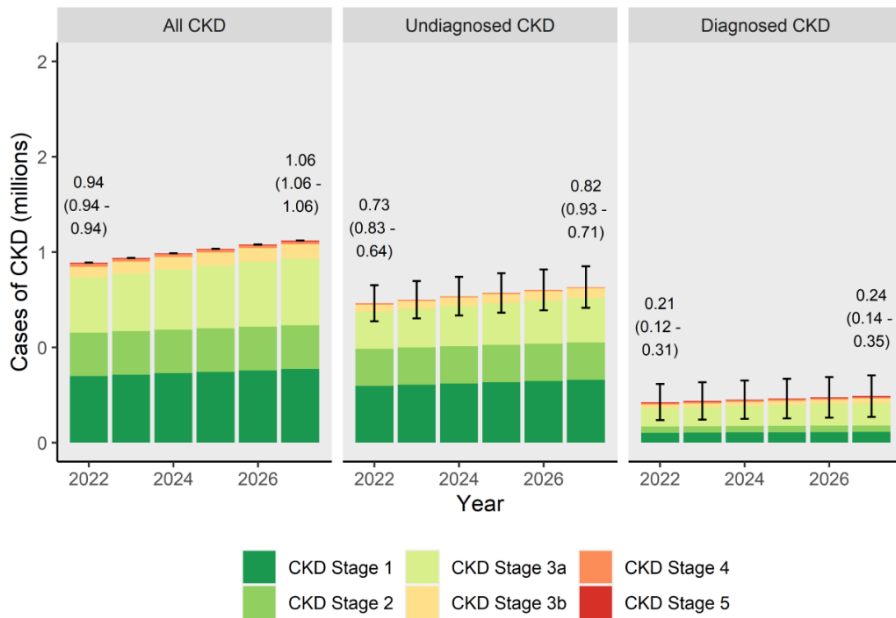

**South Korea:** Prevalence of CKD following sensitivity analysis on diagnosis rates in which a 10% increase and decrease was applied to the diagnosis rate. Breakdowns by total, undiagnosed and diagnosed CKD are provided. The error bars represent the  $\pm 10\%$  difference in diagnosis rate.

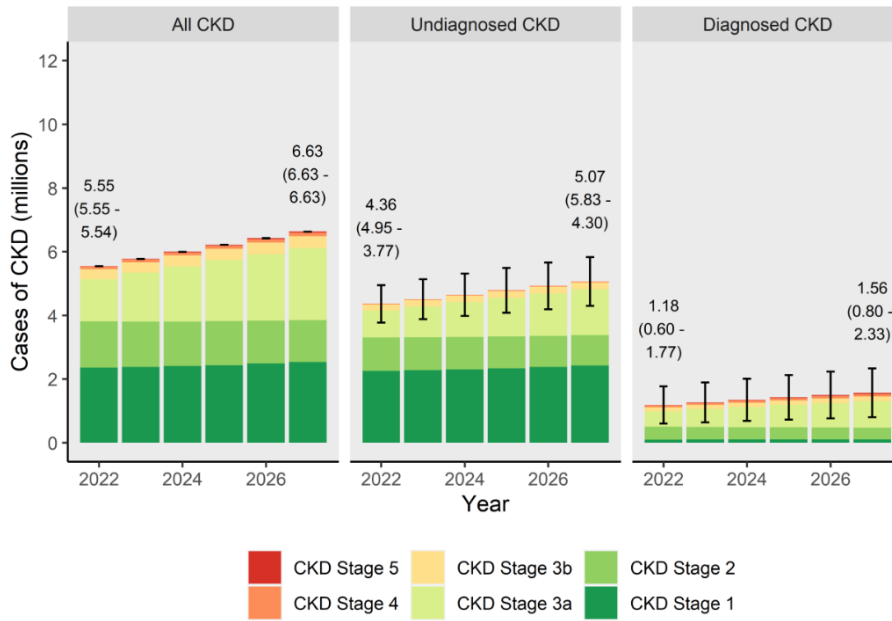

**Spain:** Prevalence of CKD following sensitivity analysis on diagnosis rates in which a 10% increase and decrease was applied to the diagnosis rate. Breakdowns by total, undiagnosed and diagnosed CKD are provided. The error bars represent the  $\pm 10\%$  difference in diagnosis rate.

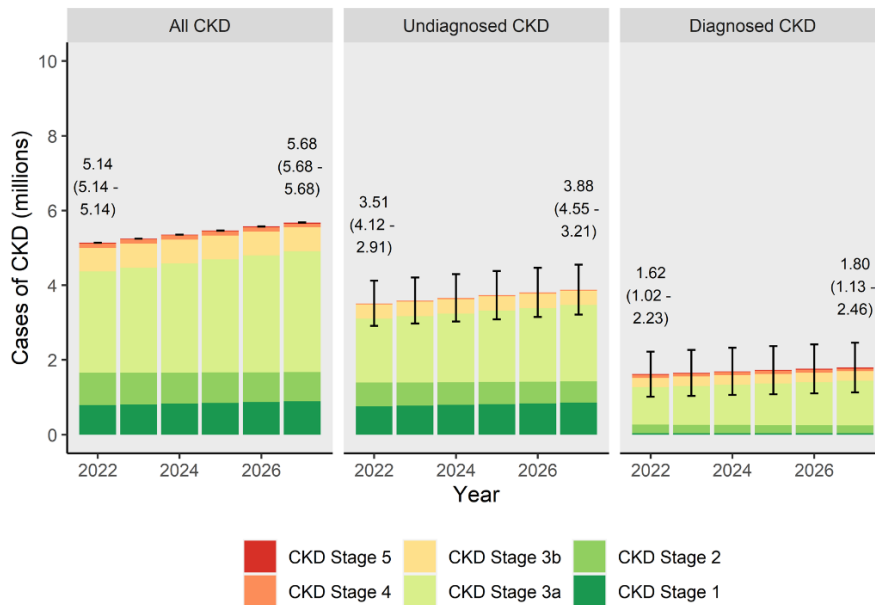

**Sweden:** Prevalence of CKD following sensitivity analysis on diagnosis rates in which a 10% increase and decrease was applied to the diagnosis rate. Breakdowns by total, undiagnosed and diagnosed CKD are provided. The error bars represent the  $\pm 10\%$  difference in diagnosis rate.

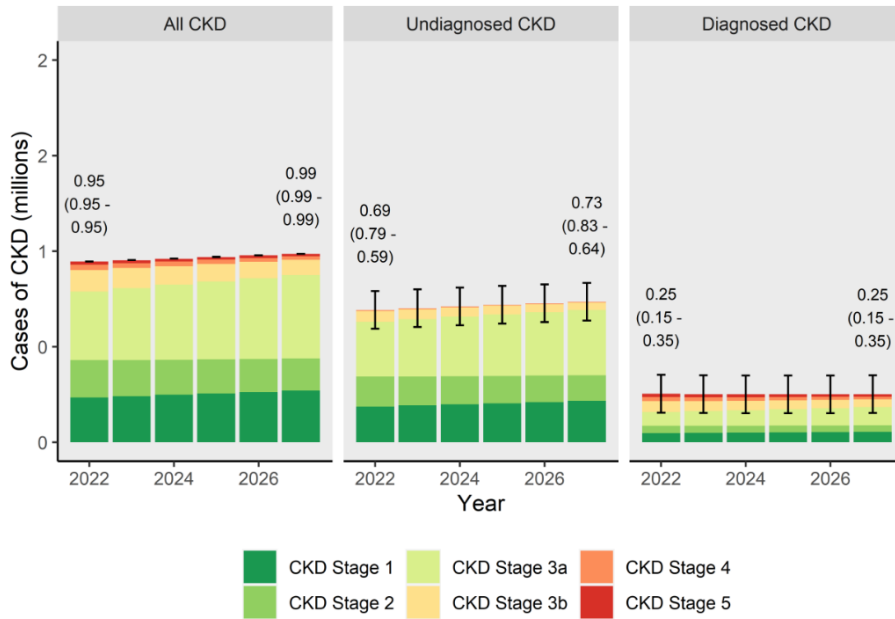

**Taiwan:** Prevalence of CKD following sensitivity analysis on diagnosis rates in which a 10% increase and decrease was applied to the diagnosis rate. Breakdowns by total, undiagnosed and diagnosed CKD are provided. The error bars represent the  $\pm 10\%$  difference in diagnosis rate.

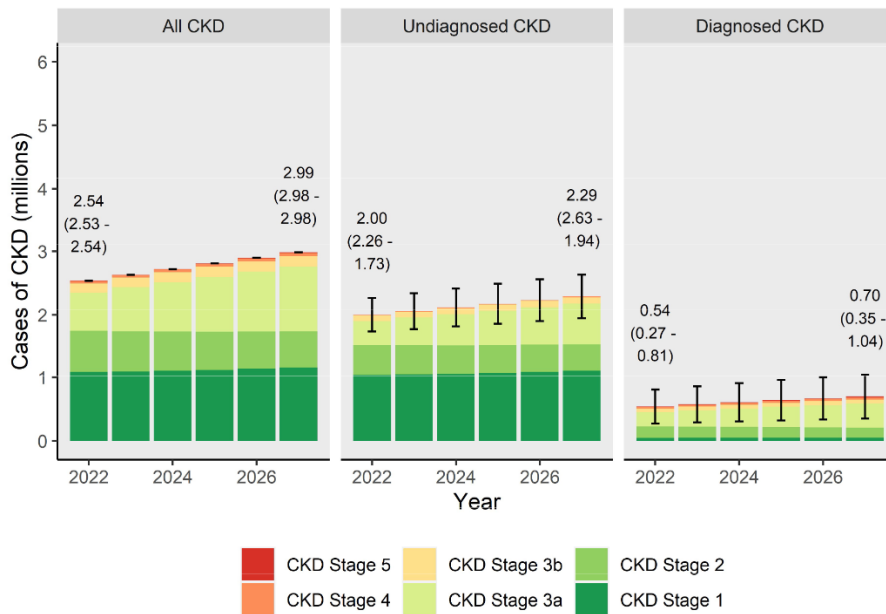

**Thailand:** Prevalence of CKD following sensitivity analysis on diagnosis rates in which a 10% increase and decrease was applied to the diagnosis rate. Breakdowns by total, undiagnosed and diagnosed CKD are provided. The error bars represent the  $\pm 10\%$  difference in diagnosis rate.

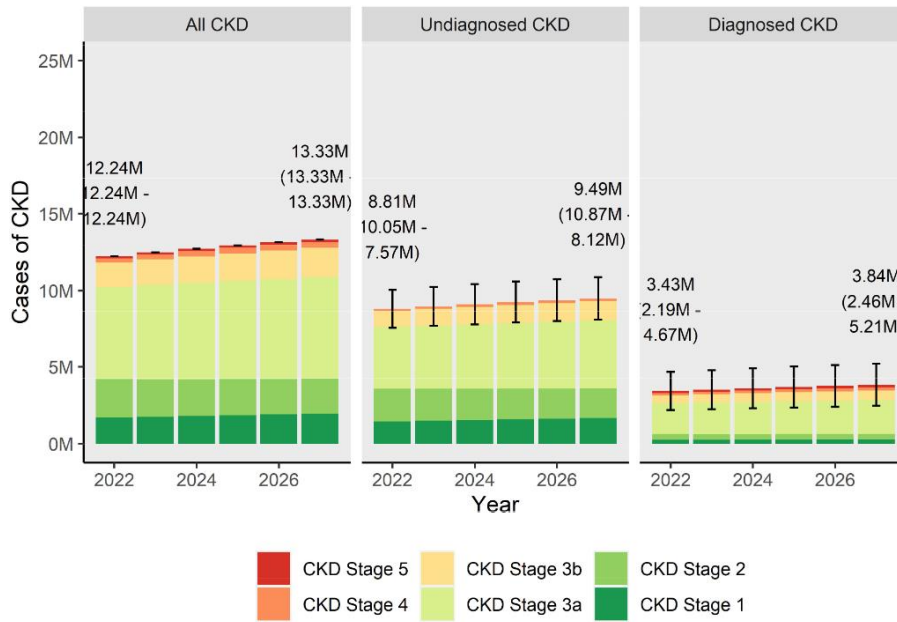

**Türkiye:** Prevalence of CKD following sensitivity analysis on diagnosis rates in which a 10% increase and decrease was applied to the diagnosis rate. Breakdowns by total, undiagnosed and diagnosed CKD are provided. The error bars represent the  $\pm 10\%$  difference in diagnosis rate.

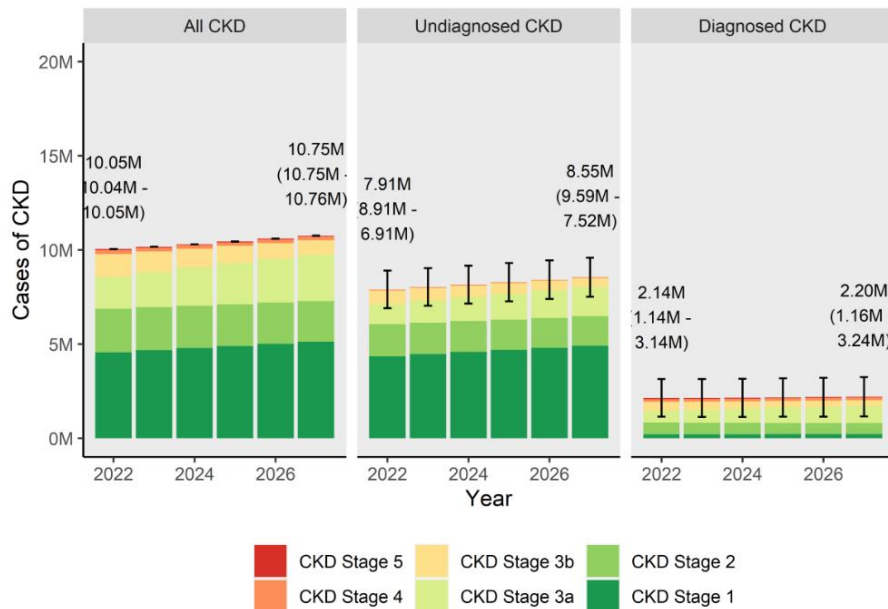



**UAE:** Prevalence of CKD following sensitivity analysis on diagnosis rates in which a 10% increase and decrease was applied to the diagnosis rate. Breakdowns by total, undiagnosed and diagnosed CKD are provided. The error bars represent the  $\pm 10\%$  difference in diagnosis rate.

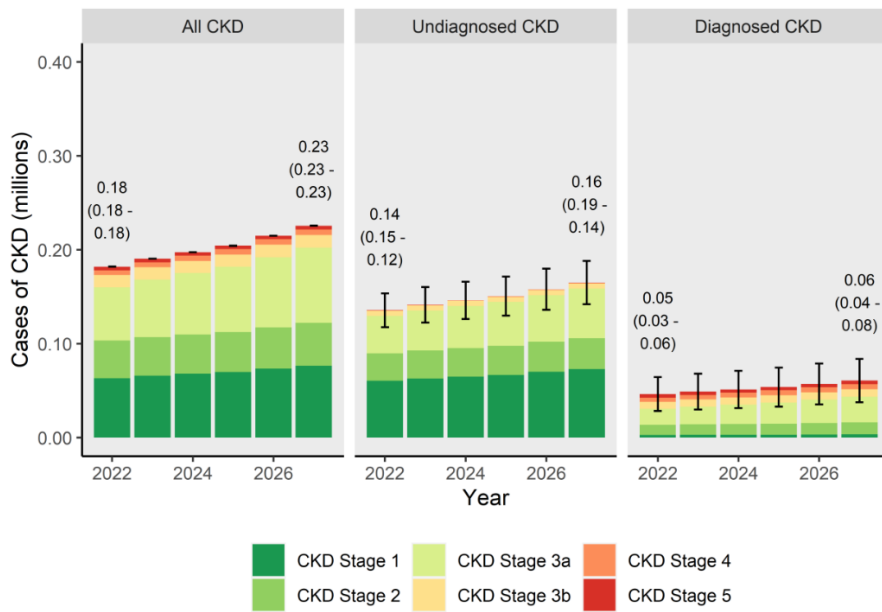

**UK:** Prevalence of CKD following sensitivity analysis on diagnosis rates in which a 10% increase and decrease was applied to the diagnosis rate. Breakdowns by total, undiagnosed and diagnosed CKD are provided. The error bars represent the  $\pm 10\%$  difference in diagnosis rate.

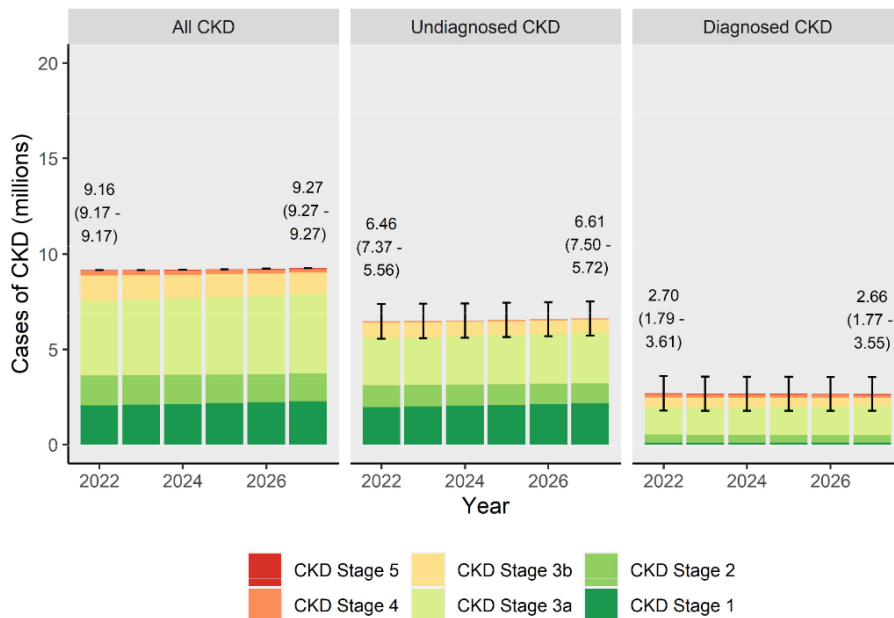

**USA:** Prevalence of CKD following sensitivity analysis on diagnosis rates in which a 10% increase and decrease was applied to the diagnosis rate. Breakdowns by total, undiagnosed and diagnosed CKD are provided. The error bars represent the  $\pm 10\%$  difference in diagnosis rate.

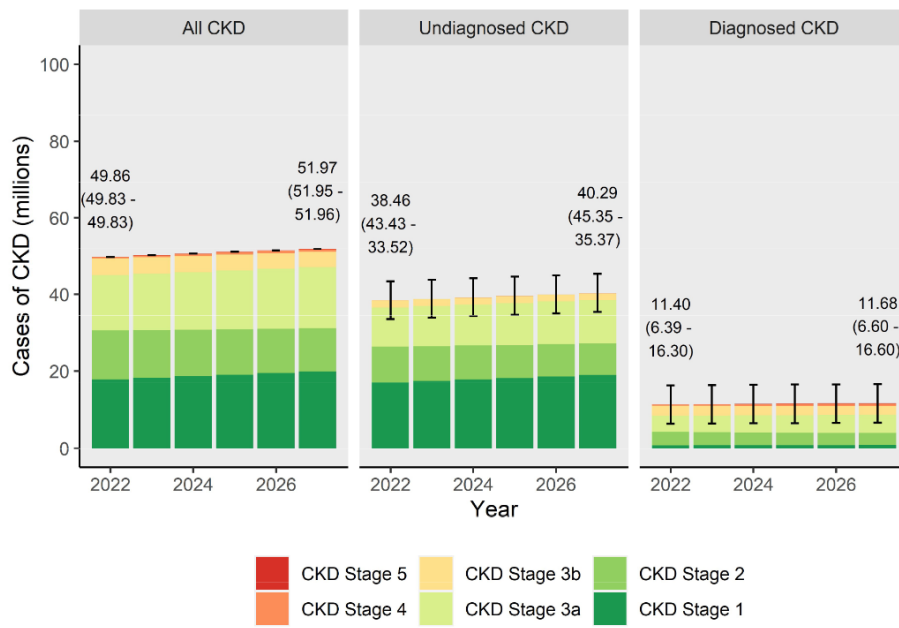

## Supplementary references

### Table S2 references

1. Australian Bureau of Statistics. Australian Health Survey: Biomedical Results for Chronic Diseases, 2011–12. 2013. <https://www.abs.gov.au/statistics/health/health-conditions-and-risks/australian-health-survey-biomedical-results-chronic-diseases/latest-release> (accessed May 01, 2022).
2. Sparke C, Moon L, Green F, et al. Estimating the Total Incidence of Kidney Failure in Australia Including Individuals Who Are Not Treated by Dialysis or Transplantation. *Am J Kidney Dis* 2013; **61**(3): 413–19.
3. Australia and New Zealand Dialysis and Transplant Registry (ANZDATA). ANZDATA 43rd Annual Report 2020 (Data to 2019). 2021. <https://www.anzdata.org.au/report/anzdata-43rd-annual-report-2020-data-to-2019/> (accessed Jun 01, 2022).
4. NHS Digital. Health Survey for England, 2016. 2017. <https://digital.nhs.uk/data-and-information/publications/statistical/health-survey-for-england/health-survey-for-england-2016> (accessed Jul 29, 2020).
5. British Heart Foundation (BHF). BHF Statistics: Heart and circulatory disease statistics 2020. 2020. <https://www.bhf.org.uk/what-we-do/our-research/heart-statistics> (accessed Jun 01, 2022).
6. Barendregt J, van Oortmarssen G, Vos T, Murray C. A generic model for the assessment of disease epidemiology: the computational basis of DisMod II. *Popul Health Metr* 2003; **1**: 4.
7. US Renal Data System, USRDS 2009 Annual Data Report: Atlas of Chronic Kidney Disease and End-Stage Renal Disease in the United States. 2009. [https://www.usrds.org/2009/pdf/V1\\_06\\_09.pdf](https://www.usrds.org/2009/pdf/V1_06_09.pdf). (accessed Aug 01, 2022).
8. Australian Bureau of Statistics. Heart, stroke and vascular disease. 2018. <https://www.abs.gov.au/statistics/health/health-conditions-and-risks/heart-stroke-and-vascular-disease/2017-18#data-download> (accessed Jul 01 2022).
9. Deloitte Access Economics. Economic impact of stroke in Australia. 2020. <https://www2.deloitte.com/content/dam/Deloitte/au/Documents/Economics/deloitte-au-dae-economic-impact-stroke-report-061120.pdf> (accessed Jun 01, 2022).
10. Masson P, Webster A, Hong M, Turner R, Lindley R, Craig J. Chronic kidney disease and the risk of stroke: a systematic review and meta-analysis. *Nephrol Dial Transplant* 2015; **30**(7): 1162–9.
11. United Nations. Deaths by age groups, male. World population prospects 2019. <https://population.un.org/wpp/Download/Archive/Standard/> (accessed May 4, 2022).
12. United Nations. Deaths by age groups, female. World population prospects 2019. <https://population.un.org/wpp/Download/Archive/Standard/> (accessed May 4, 2022).
13. Levey AS, de Jong P, Coesh J, et al. The definition, classification, and prognosis of chronic kidney disease: a KDIGO Controversies Conference report. *Kidney Int* 2011; **80**(1): 17–28.
14. Hirst JA, Hill N, O’Callaghan C, et al. Prevalence of chronic kidney disease in the community using data from OxRen: A UK population-based cohort study. *Br J Gen Pract* 2020; **70**(693): e285–93.
15. Van Pottelbergh G, Bartholomeeusen S, Buntinx F, Degryse J. The prevalence of chronic kidney disease in a Flemish primary care morbidity register. *Age Ageing* 2012; **41**(2): 231–3.
16. O’Callaghan CA, Shine B, Lasserson DS. Chronic kidney disease: a large-scale population-based study of the effects of introducing the CKD-EPI formula for eGFR reporting. *BMJ Open* 2011; **1**(2): e000308.
17. Cleemput I, Beguin C, de la Kethulle Y, et al. Organisation and financing of chronic dialysis in Belgium KCE reports 124C. 2010. <https://kce.fgov.be/sites/default/files/atoms/files/d20101027313.pdf> (accessed May 01, 2022).
18. Belgian Society of Nephrology (NBVN). Jaarrapport NBVN 2019: Dialyse & Transplantatie. 2019. <http://www.nbvn.be/data/Publieke-website-NBVN---jaarrapport-NBVN-2019---dialyse-&-transplantatie.pdf> (accessed Apr 01, 2022). [Dutch.]
19. UK Renal Registry. 20th Annual Report. 2018. [https://ukkidney.org/sites/renal.org/files/publication/file-attachments/Full%20Annual-Report\\_0.pdf](https://ukkidney.org/sites/renal.org/files/publication/file-attachments/Full%20Annual-Report_0.pdf) (accessed May 01, 2022).

20. Barzilay JI, Davis B, Pressel S, et al. The effects of eGFR change on CVD, renal, and mortality outcomes in a hypertensive cohort treated with 3 different antihypertensive medications. *Am J Hypertens* 2018; **31**(5): 609–14.
21. Devroey D, Van Casteren V. The incidence and first-year mortality of heart failure in Belgium: A 2-year nationwide prospective registration. *Int J Clin Pract* 2010; **64**(3): 330–5.
22. Smeets M, Vaes B, Mamouris P, et al. Burden of heart failure in Flemish general practices: A registry-based study in the Intego database. *BMJ Open* 2019; **9**(1): e022972.
23. Belgian Federal Public Service. Ischemic heart disease. 2016. 2021. <https://www.healthybelgium.be/en/health-status/non-communicable-diseases/ischemic-heart-disease#:~:text=In%202016%2C%20the%20number%20of,men%20in%20all%20age%20groups> (accessed Aug 01, 2022).
24. Moran A, Shen A, Turner-Lloveras D, et al. Utility of self-reported diagnosis and electrocardiogram Q-waves for estimating myocardial infarction prevalence: an international comparison study. *Heart* 2012; **98**(22): 1660–6.
25. Institute for Health Metrics and Evaluation (IHME). Global Burden of Disease Study 2019 (GBD 2019) Data Resources: Ischemic heart disease, stroke. 2019. <http://ghdx.healthdata.org/gbd-2019> (accessed Aug 01, 2021).
26. Piccolli AP, do Nascimento MM, Riella MC. Prevalence of chronic kidney disease in a population in southern Brazil (Pro-Renal Study). *J Bras Nefrol* 2017; **39**(4): 384–90.
27. Pyart R, Evans K, Steenkamp R, et al. The 21st UK Renal Registry Annual Report: A Summary of Analyses of Adult Data in 2017. *Nephron* 2020; **144**(2): 59–66.
28. Organización Nacional de Trasplantes. Registro Español de Enfermos Renales (REER). 2018. <http://www.registrorenal.es/> (accessed Jun 01, 2022). [Spanish.]
29. Machado E, Caiaffa W, César C, et al. Iniquities in the access to renal transplant for patients with end-stage chronic renal disease in Brazil. *Cad Saude Publica* 2011; **27**(supp 2): S284–97.
30. Brazilian Society of Nephrology, Brazilian dialysis registry. 1997. <http://gamba.epm.br/registro/97/rghd97.html> (accessed May 01, 2022).
31. Neves PDMM, Sesso R, Thomé F, Lugon J, Nascimento M. Brazilian dialysis survey 2019. *J Bras Nefrol* 2021; **43**(2): 217–27.
32. Oliveira JGG, Monteiro MS, Teixeira JF, et al. Humoral immune response after kidney transplantation is enhanced by acute rejection and urological obstruction and is downregulated by mycophenolate mofetil treatment. *Transpl Int* 2005; **18**(11): 1286–91.
33. Ruiz-Hurtado G, Ruilope LM, de la Sierra A, et al. Association between high and very high albuminuria and nighttime blood pressure: influence of diabetes and chronic kidney disease. *Diabetes Care* 2016; **39**(10): 1729–37.
34. Fernández-Gassó L, Hernando-Arizaleta L, Palomar-Rodríguez J, Abellán-Pérez M, Hernández-Vicente Á, Pascual-Figal D. Population-based Study of First Hospitalizations for Heart Failure and the Interaction Between Readmissions and Survival. *Rev Esp Cardiol (Engl Ed)* 2019; **72**(9): 740–8.
35. Oliveira G, Brant L, Polanczyk C, et al. Cardiovascular statistics – Brazil 2020. *Arq Bras Cardiol* 2020; **115**(3): 308–439.
36. Forcadell MJ, Vila-Córcoles A, de Diego C, Ochoa-Gondar O, Satué E. Incidence and mortality of myocardial infarction among Catalonian older adults with and without underlying risk conditions: The CAPAMIS study. *Eur J Prev Cardiol* 2018; **25**(17): 1822–30.
37. Vega T, Zurriaga O, Ramos J, et al. Stroke in Spain: Epidemiologic Incidence and Patterns; A Health Sentinel Network Study. *J Stroke Cerebrovasc Dis* 2009; **18**(1): 11–16.
38. Bakris G, et al. Prevalence and factors associated with undiagnosed chronic kidney disease in diabetes mellitus. 2020. <https://casehippo.com/spa/symposium/national-kidney-foundation-2019-spring-clinical-meetings/event/gallery/abstracts?abstractId=119> (accessed Aug 01, 2021).
39. Canadian Institute for Health Information. Canadian Organ Replacement Register (CORR). 2021. <https://www.cihi.ca/en/canadian-organ-replacement-register-corr> (accessed Jul 29, 2020).
40. United States Renal Data System (USRDS). USRDS Annual Data Report: Epidemiology of kidney disease in the United States 2021. 2021. <https://adr.usrds.org/2021> (accessed Aug 01, 2021).
41. Armstrong M, Weaver R, Pannu N, Services AH. Prevalence and Quality of Care in Chronic Kidney Disease Alberta Kidney Care Report. 2019. <https://www.albertahealthservices.ca/assets/about/scn/ahs-scn-kh-ckd-report-2019.pdf> (accessed Aug 01, 2022).

42. Centers for Disease Control and Prevention. National Health and Nutrition Examination Survey. 2020. <https://www.cdc.gov/nchs/nhanes/index.htm>. (accessed Aug 01, 2022).
43. Government of Canada. Canadian Chronic Disease Surveillance System (CCDSS). 2018. <https://health-infobase.canada.ca/ccdss/data-tool/> (accessed Jul 30, 2020).
44. Zhang L, Wang F, Wang L, et al. Prevalence of chronic kidney disease in China: A cross-sectional survey. *Lancet* 2012; **379**: 815–22.
45. Japanese Society of Nephrology. CKD Medical Care Guide. 2012. <https://jsn.or.jp/guideline/pdf/CKDguide2012.pdf> (accessed May 01, 2022).
46. Watanabe Y, Yamagata K, Nishi S, et al. Japanese Society for Dialysis Therapy Clinical Guideline for "Hemodialysis Initiation for Maintenance Hemodialysis". *Ther Apher Dial* 2015; **19**: 93–107.
47. Zhang L, Zhao M, Zuo L, et al. China Kidney Disease Network (CK-NET) 2015 Annual Data Report. *Kidney Int Suppl* 2019; **9**(1): e1–81.
48. Chinese National Renal Data System. 国家肾脏病医疗质量控制中心. <http://www.cnrds.net/TxLogin> (accessed May 01, 2022).
49. Sun L, Zou L, Han YC, et al. Forecast of the incidence, prevalence and burden of end-stage renal disease in Nanjing, China to the Year 2025. *BMC Nephrol* 2016; **17**: 60.
50. Xue W, Tian P, Xiang H, et al. Outcomes for primary kidney transplantation from donation after Citizens' death in China: a single-center experience of 367 cases. *BMC Health Serv Res* 2017; **17**(1): 250.
51. Sun XQ, Li JS, Sui YY, et al. Investigation of epidemiologic features and treatment of chronic heart failure in some rural parts of Liaoning province. *Chinese J Pract Intern Med* 2009; **11**: 1000–2.
52. Yamato M, Aizu H, Kurohara K, Tanaka J. Japanese local language paper: [https://www.kyoukaikenpo.or.jp/~media/Files/honbu/cat740/houkokusho/h28/houkokusho\\_11.pdf](https://www.kyoukaikenpo.or.jp/~media/Files/honbu/cat740/houkokusho/h28/houkokusho_11.pdf) (accessed Aug 31, 2023). [Japanese.]
53. Otero A, de Francisco A, Gayoso P, et al. Prevalence of chronic renal disease in Spain: results of the EPIRCE study. *Nefrología* 2010; **30**(1): 78–86.
54. Gorostidi M, Sánchez-Martínez M, Ruilope L, et al. Chronic kidney disease in Spain: Prevalence and impact of accumulation of cardiovascular risk factors *Nefrología*, 2018; **38**(6): 606–15.
55. Cuenta de Alto Costo. Situación de la enfermedad renal crónica, la hipertensión arterial y la diabetes mellitus en Colombia 2020. 2021. <https://cuentadealtocosto.org/site/erc/situacion-de-la-enfermedad-renal-cronica-la-hipertension-arterial-y-la-diabetes-mellitus-en-colombia-2020/> (accessed May 11, 2022). [Spanish.]
56. Urrego A. Riñón, hígado y corazón, los órganos más trasplantados en el último año en Colombia. 2022. <https://www.larepublica.co/salud-ejecutiva/rinon-higado-y-corazon-los-organos-mas-trasplantados-en-el-ultimo-ano-en-colombia-3312287> (accessed May 11, 2022). [Spanish.]
57. Estupiñán-Bohórquez A, Acosta-Reyes J, Viasus-Pérez D, García-López A, Patino-Jaramillo N, Girón-Luque F. Trasplante renal de donantes con criterios expandidos en la región Caribe colombiana. *Nefro Latinoam* 2021; **18**: 119–27. [Spanish].
58. Gómez E. Introduction, epidemiology of heart failure and the history of cardiac failure clinics in Colombia. *Rev Colomb Cardiol* 2016; **23**(S1): 6–12. [Spanish.]
59. Sistema Integrado de Información de la Protección Social (SISPRO) and Congreso de la República Colombiana. Ponencia segundo debate PL 017 DE 2020 enfermedades ACV. 2021. <https://www.camara.gov.co/camara/visor?doc=/sites/default/files/2021-05/Ponencia%20Segundo%20Debate%20PL%20017%20DE%202020%20Enfermedades%20ACV.pdf> (accessed May 11, 2022). [Spanish.]
60. Gómez-Mesa J, et al. Colombian registry of heart failure (RECOLFACA): results. *Rev Colomb Cardiol* 2021; **28**(4): 334–44. [Spanish.]
61. Bedoya-Rios C, Mendoz-Lozano J, Nieto-Cardenas O. Prevalence of myocardial infarction in a cardiovascular risk program of a health care institution in Armenia-Quindío. *Rev Colomb Cardiol* 2016; **23**(6): 561–7. [Spanish.]
62. El Hospital. Bogotá is the Colombian city with the highest prevalence of stroke. Internal medicine and subspecialties. 2018. <https://www.elhospital.com/temas/Bogota-es-la-ciudad-colombiana-con-mayor-prevalencia-de-ataque-cerebrovascular+127097#:~:text=Seg%C3%BAn%20la%20Asociaci%C3%B3n%20colombiana%20de,emergencia%20para%20su%20pronta%20atenci%C3%B3n> (accessed May 13, 2022). [Spanish.]

63. Danish Society of Nephrology (DSN). Kronisk nyresygdom: Analysemetoder og klinisk evaluering. 2015. <https://nephrology.dk/vejledninger/ckd-mbd/kronisk-nyresygdom/> (accessed Jul 01, 2022). [Danish.]
64. Danish Nephrological Society National Register (DNSL). Nationwide database for patients with chronic renal failure: Report for 2020. 2020. [https://www.sundhed.dk/content/cms/92/4692\\_dns-l-aarsrapport-2020---endelig.pdf](https://www.sundhed.dk/content/cms/92/4692_dns-l-aarsrapport-2020---endelig.pdf) (accessed Jul 01, 2022). [Danish.]
65. Sundhed DK. Kidney Transplant. 2019. <https://www.sundhed.dk/borger/patienthaandbogen/nyrer-og-urinveje/sygdomme/diverse/nyretransplantation/> (accessed Jul 01, 2022). [Danish.]
66. Hjerte Foreningen. Heart failure: new cases (35+ years). 2018. [https://hjertereforeningen.shinyapps.io/HjerteTal/?\\_inputs\\_&agCVD=%22age%22&bar=%22cvd%22&year=%222018%22&varCVD=%22v1%22&oCVD=%22d8%22](https://hjertereforeningen.shinyapps.io/HjerteTal/?_inputs_&agCVD=%22age%22&bar=%22cvd%22&year=%222018%22&varCVD=%22v1%22&oCVD=%22d8%22) (accessed Jan 01, 2022).
67. Hjerte Foreningen. Heart failure: total cases (35+ year olds). 2018. [https://hjertereforeningen.shinyapps.io/HjerteTal/?\\_inputs\\_&agCVD=%22age%22&bar=%22cvd%22&year=%222018%22&varCVD=%22v2%22&oCVD=%22d8%22](https://hjertereforeningen.shinyapps.io/HjerteTal/?_inputs_&agCVD=%22age%22&bar=%22cvd%22&year=%222018%22&varCVD=%22v2%22&oCVD=%22d8%22) (accessed Jan 01, 2022).
68. Hjerte Foreningen. Myocardial embolism (AMI): new cases (35+ years). 2018. [https://hjertereforeningen.shinyapps.io/HjerteTal/?\\_inputs\\_&agCVD=%22age%22&bar=%22cvd%22&year=%222018%22&varCVD=%22v1%22&oCVD=%22d3%22](https://hjertereforeningen.shinyapps.io/HjerteTal/?_inputs_&agCVD=%22age%22&bar=%22cvd%22&year=%222018%22&varCVD=%22v1%22&oCVD=%22d3%22) (accessed Jan 01, 2022).
69. Hjerte Foreningen. Vascular diseases of the brain (incl. stroke): new cases (35+ years). 2018. [https://hjertereforeningen.shinyapps.io/HjerteTal/?\\_inputs\\_&agCVD=%22age%22&bar=%22cvd%22&year=%222018%22&varCVD=%22v1%22&oCVD=%22d10%22](https://hjertereforeningen.shinyapps.io/HjerteTal/?_inputs_&agCVD=%22age%22&bar=%22cvd%22&year=%222018%22&varCVD=%22v1%22&oCVD=%22d10%22) (accessed Jan 01, 2022).
70. Hjerte Foreningen. Vascular diseases of the brain (incl. stroke): total cases (35+ year olds). 2018. [https://hjertereforeningen.shinyapps.io/HjerteTal/?\\_inputs\\_&agCVD=%22age%22&bar=%22cvd%22&year=%222018%22&varCVD=%22v2%22&oCVD=%22d10%22](https://hjertereforeningen.shinyapps.io/HjerteTal/?_inputs_&agCVD=%22age%22&bar=%22cvd%22&year=%222018%22&varCVD=%22v2%22&oCVD=%22d10%22) (accessed Jan 01, 2022).
71. Agence de le biomédecine. REIN Annual Report 2018. [https://www.agence-biomedecine.fr/IMG/pdf/rapport\\_rein\\_2018\\_v2.pdf](https://www.agence-biomedecine.fr/IMG/pdf/rapport_rein_2018_v2.pdf) (accessed Nov 01, 2022). [French.]
72. Girndt M, Trocchi P, Scheidt-Nave C, Stang A. The Prevalence of Renal Failure. Results from the German Health Interview and Examination Survey for Adults, 2008-2011 (DEGS1). *Dtsch Arztebl Int* 2016; **113**: 85-91.
73. Horl WH, Wanner CH. Dialyseverfahren in Klinik und Praxis: Technik und Klinik. Stuttgart, DE: Georg Thieme Verlag, 2004. [German.]
74. Frei U, Schober-Halstenberg HJ. Nieren-Ersatztherapie in Deutschland. 2008. [https://www.bundesverband-niere.de/wp-content/uploads/2019/02/QuaSi-Niere-Bericht\\_2006-2007.pdf](https://www.bundesverband-niere.de/wp-content/uploads/2019/02/QuaSi-Niere-Bericht_2006-2007.pdf) (accessed May 01, 2022). [German.]
75. Satayathum S, Pisoni L, McCullough K, et al. Kidney transplantation and wait-listing rates from the international Dialysis Outcomes and Practice Patterns Study (DOPPS). *Kidney Int* 2005; **68**: 330-7.
76. GBE Federation. Federal health reporting. 2021. <https://www.gbe-bund.de/gbe/> (accessed Aug 01, 2022).
77. ERA-EDTA Registry. ERA-EDTA Registry Annual Report 2019. 2019. <https://www.era-online.org/registry/AnnRep2019.pdf> (accessed Jun 28, 2022).
78. Grandaliano. 61° Congresso Nazionale Società Italiana Nefrologia (SIN). Available from: <https://congresso2020.eventisin.it/>. (accessed Apr 01, 2022).
79. Piccinni C, Antonazzo I, Simonetti M, et al. The Burden of Chronic Heart Failure in Primary Care in Italy. *High Blood Press Cardiovasc Prev* 2017; **24**(2): 171-8.
80. Bosch L, Assmann P, de Grauw W, Schalk B, Biermans M. Heart failure in primary care: prevalence related to age and comorbidity. *Prim Health Care Res Dev* 2019; **20**: e79.
81. Regione Lombardia, Registro dell'infarto miocardico acuto nell'Asl di Brescia. Rapporto 2003-2009. [https://www.ats-brescia.it/documents/3432658/70845777/RegistroIMA\\_2003\\_09.pdf/1dec3046-29b2-b0c8-850d-30f2d8615a61](https://www.ats-brescia.it/documents/3432658/70845777/RegistroIMA_2003_09.pdf/1dec3046-29b2-b0c8-850d-30f2d8615a61) (accessed Apr 01, 2022). [Italian.]
82. Hellenic Statistical Authority. Press Release: Health Research 2019. 2020. [https://www.statistics.gr/el/statistics?p\\_p\\_id=documents\\_WAR\\_publicationsportlet\\_INSTANCE\\_qDQ8fBKKo4IN&p\\_p\\_lifecycle=2&p\\_p\\_state=normal&p\\_p\\_mode=view&p\\_p\\_cacheability=cacheLevelPage&p\\_p\\_col\\_id=column-2&p\\_p\\_col\\_count=4&p\\_p\\_col\\_pos=1&\\_documents\\_WAR\\_publicationsportlet\\_INSTA](https://www.statistics.gr/el/statistics?p_p_id=documents_WAR_publicationsportlet_INSTANCE_qDQ8fBKKo4IN&p_p_lifecycle=2&p_p_state=normal&p_p_mode=view&p_p_cacheability=cacheLevelPage&p_p_col_id=column-2&p_p_col_count=4&p_p_col_pos=1&_documents_WAR_publicationsportlet_INSTA)

- NCE\_qDQ8fBKKo4IN\_javax.faces.resource=document&\_documents\_WAR\_publicationsportlet\_INSTANCE\_qDQ8fBKKo4IN\_in=downloadResources&\_documents\_WAR\_publicationsportlet\_INSTANCE\_qDQ8fBKKo4IN\_documentID=461317&\_documents\_WAR\_publicationsportlet\_INSTANCE\_qDQ8fBKKo4IN\_locale=el (accessed Jun 01, 2022). [Greek].
83. Karantali E, Vemos K, Tsampalas E, et al. Temporal trends in stroke incidence and case-fatality rates in Arcadia, Greece: A sequential, prospective, population-based study. *Int J Stroke* 2022; **17**(1): 37–47.
  84. Zdrojewski L, Zdrojewski T, Rutkowski M, et al. Prevalence of chronic kidney disease in a representative sample of the Polish population: results of the NATPOL 2011 survey. *Nephrol Dial Transplant* 2016; **31**(3): 433–9.
  85. Chudek J, Wieczorowska-Tobis K, Zejda J, et al. The prevalence of chronic kidney disease and its relation to socioeconomic conditions in an elderly Polish population: results from the national population-based study PolSenior. *Nephrol Dial Transplant* 2014; **29**(5): 1073–82.
  86. Hungarian Society of Nephrology. MANET 2016–2019. 2020. <http://www.nephrologia.hu/info.aspx?sp=200> (accessed Aug 01, 2021). [Hungarian].
  87. Anand S, Shivashankar R, Ali M, et al. Prevalence of chronic kidney disease in two major Indian cities and projections for associated cardiovascular disease. *Kidney Int* 2015; **88**: 178–85.
  88. UK Renal Registry. UK Renal Registry 23rd Annual Report. 2021. [https://ukkidney.org/sites/renal.org/files/publication/file-attachments/23rd\\_UKRR\\_ANNUAL\\_REPORT\\_0.pdf](https://ukkidney.org/sites/renal.org/files/publication/file-attachments/23rd_UKRR_ANNUAL_REPORT_0.pdf) (accessed May 01, 2022).
  89. Parameswaran S, Geda S, Rathi M, et al. Referral pattern of patients with end-stage renal disease at a public sector hospital and its impact on outcome. *Natl Med J India* 2011; **24**: 208–13.
  90. Nitta K, Goto S, Masakane I, et al. Annual dialysis data report for 2018, JSDT Renal Data Registry: Survey methods, facility data, incidence, prevalence, and mortality. *Renal Replace Ther* 2020; **6**: 1–18.
  91. The Japanese Society for Transplantation. Fact book on organ transplantation in Japan. 2020. <http://www.asas.or.jp/jst/pdf/factbook/factbook2020.pdf> (accessed Jun 01, 2022). [Japanese.]
  92. Bharati J, Jha V. Global Dialysis Perspective: India. *Kidney360* 2020; **1**: 1143–7.
  93. Centers for Disease Control & Prevention (CDC). National Health and Nutrition Examination Survey (NHANES). 2020. <https://www.cdc.gov/nchs/nhanes/index.htm> (accessed Jul 01, 2020).
  94. E-Stat. Portal Site of Official Statistics of Japan. 2017. <https://www.e-stat.go.jp/en> (accessed Apr 01, 2022).
  95. The Japanese Registry of All Cardiac and Vascular Diseases. Cardiovascular disease medical treatment fact-finding report, 2019. 2019. [https://www.j-circ.or.jp/jittai\\_chosa/jittai\\_chosa2018web.pdf](https://www.j-circ.or.jp/jittai_chosa/jittai_chosa2018web.pdf) (accessed Apr 01, 2022).
  96. Ministry of Health, Labour and Welfare, Japan. Draft budget outline for fiscal year 2014. 2019. <https://www.mhlw.go.jp/english/policy/other/budget/dl/1st-fy2014-e.pdf> (accessed Apr 01, 2022).
  97. Das SK, Biswas A, Roy T, et al. A random sample survey for prevalence of major neurological disorders in Kolkata. *Indian J Med Res* 2006; **124**: 163–72.
  98. Hebrew local language paper, 2021 [https://www.gov.il/BlobFolder/reports/dialysis-in-israel-2020/he/files\\_publications\\_units\\_ICDC\\_dialysisinisrael2020.pdf](https://www.gov.il/BlobFolder/reports/dialysis-in-israel-2020/he/files_publications_units_ICDC_dialysisinisrael2020.pdf) (accessed Apr 01, 2022).
  99. De Nicola L, Donfrancesco C, Minutolo R, et al. Prevalence and cardiovascular risk profile of chronic kidney disease in Italy: results of the 2008–12 National Health Examination Survey. *Nephrol Dial Transplant* 2015; **30**: 806–14
  100. Valeria, M, Pasquale B, Franco B, et al. Ministero della Salute Documento di Indirizzo per la Malattia Renale Cronica. [http://www.salute.gov.it/imgs/C\\_17\\_pubblicazioni\\_2244\\_allegato.pdf](http://www.salute.gov.it/imgs/C_17_pubblicazioni_2244_allegato.pdf) (accessed Jul 01, 2022). [Italian.]
  101. Nordio M, Limido A, Postorino M. Present and future of kidney replacement therapy in Italy: the perspective from Italian Dialysis and Transplantation Registry (IDTR). *J Nephrol* 2020; **33**(6): 1195–1200.
  102. Corso G, Bottacchi E, Giardini G, et al. Epidemiology of stroke in northern Italy: the Cerebrovascular Aosta Registry, 2004–2008. *Neurol Sci* 2013; **34**: 1071–81.
  103. Yagisawa T, Mieno M, Ichimaru N, et al. Trends of kidney transplantation in Japan in 2018: data from the kidney transplant registry. *Ren Replace Ther* 2019; **5**: 1–14.
  104. Takashima N, Arima H, Kita Y, et al. Incidence, management and short-term outcome of stroke in a general population of 1.4 million Japanese – Shiga stroke registry. *Circ J* 2017; **81**: 1636–46.

105. Cueto-Manzano AM, Cortés-Sanabria L, Martínez-Ramírez HR, Rojas-Campos E, Gómez-Navarro B, Castellero-Manzano M. Prevalence of Chronic Kidney Disease in an Adult Population. *Arch Med Res* 2014; **45**: 507–13.
106. United States Renal Data System (USRDS). USRDS Annual Data Report: Epidemiology of kidney disease in the United States. 2020. <https://adr.usrds.org/2020/> (accessed Jun 01, 2022).
107. Garcia-Garcia G, Briseño-Rentería G, Luquín-Arellan VH, Gao Z, Gill J, Tonelli M. Survival among patients with kidney failure in Jalisco, Mexico. *J Am Soc Nephrol* 2007; **18**: 1922–7.
108. Farré N, Vela E, Clèries M, et al. Real world heart failure epidemiology and outcome: A population-based analysis of 88,195 patients. *PLoS One* 2017; **12**: e0172745.
109. Federatie Medisch Specialisten. Diabetic Nephropathy: Timing renal function replacement therapy in diabetic nephropathy. 2020. [https://richtlijndatabase.nl/richtlijn/diabetische\\_nefropathie/timing\\_nierfunctievervangende\\_therapie\\_bij\\_diabetische\\_nefropathie.html](https://richtlijndatabase.nl/richtlijn/diabetische_nefropathie/timing_nierfunctievervangende_therapie_bij_diabetische_nefropathie.html) (accessed Jul 01, 2022). [Dutch.]
110. Nefrovisie. 2022. <https://ivisualz.nl/ivisualz/chartFlash/charts/> (accessed Jul 01, 2022). [Dutch.]
111. Dutch Heart Foundation, et al. Cardiovascular disease in the Netherlands, 2021. [Chapter 3]. Den Haag, 2021 (December 2021). Available from: <https://www.hartstichting.nl/getmedia/06fb9c92-a1f7-4135-a635-ff73680bfaa6/cijferboek-hartstichting-hart-vaatziekten-nederland-2016.pdf>. [Dutch.]
112. Nang EEK, Khoo CM, Tai ES, et al. Is there a clear threshold for fasting plasma glucose that differentiates between those with and without neuropathy and chronic kidney disease? The Singapore Prospective Study Program. *Am J Epidemiol* 2009; **169**: 1454–62.
113. United States Renal Data System (USRDS). Annual data report: International comparisons. 2020. <https://adr.usrds.org/2020/end-stage-renal-disease/11-international-comparisons> (accessed Mar 01, 2022).
114. Wong LY, Liew AST, Lim CK, Vathsala A, Toh MPH. Projecting the Burden of Chronic Kidney Disease in a Developed Country and Its Implications on Public Health. *Int J Nephrol* 2018; **2018**: 5196285.
115. Myśliwiec M, et al. Chronic renal failure. 2021. <https://www.mp.pl/pacjent/nefrologia/choroby/chorobyudoroslych/51919,przewlekla-niewydolnosc-nerek> (accessed Jul 01, 2022). [Polish.]
116. National Health Fund (NHF). Chronic kidney disease. 2020. <https://ezdrowie.gov.pl/5668> (accessed Jul 01, 2022). [Polish.]
117. Dębska-Słizień A, Bolesław R, Piotr J, et al. Current Status of Renal Replacement Therapy in Poland in 2020. *Nephrol Dial Pol* 2021; **25**: 7–20.
118. MPZ Kardiologia. Health needs map in the field of cardiology for the Masovian Voivodeship. 2018. [https://mpz.mz.gov.pl/wp-content/uploads/2019/06/mpz\\_kardiologia\\_mazowieckie.pdf](https://mpz.mz.gov.pl/wp-content/uploads/2019/06/mpz_kardiologia_mazowieckie.pdf) (accessed Jul 01, 2022). [Polish.]
119. Spitalul Clinic de Nefrologie Carol Davila. Registrul Renal Român. 2022. <https://www.spcaroldavila.ro/activitati/registrul-renal-roman/> (accessed Aug 01, 2022). [Romanian.]
120. Registrul Renal Român. Raportul Registrului Renal Român 2019–2020. 2020. [http://registrulrenal.ro/resurse\\_statistica/Raport\\_RRR\\_2019\\_2020.pdf](http://registrulrenal.ro/resurse_statistica/Raport_RRR_2019_2020.pdf). (accessed Feb 01, 2023).
121. European Renal Association. Annual Reports. 2017–2019. 2019–2022. <https://www.era-online.org/en/registry/publications/annual-reports/>. (accessed Feb 01, 2023).
122. Spitalul Clinic de Nefrologie Carol Davila. Olnavi tratați și aparate de dializă pe județe 2017. 2017. [https://www.spcaroldavila.ro/wp-content/uploads/2015/09/Raport\\_2017\\_Jud.pdf](https://www.spcaroldavila.ro/wp-content/uploads/2015/09/Raport_2017_Jud.pdf) (accessed Aug 01, 2022). [Romanian.]
123. Ahmed HG, Ginawi IA, Al-hazimi AM. Prevalence estimates of chronic kidney disease in Hail Region, KSA: in a comprehensive survey. *Int J Sci Res* 2014; **3**: 252–6.
124. Al-Attar, B. Renal replacement therapy in the Kingdom of Saudi Arabia. *Saudi J Kidney Dis Transpl* 2021; **32**: 1188–1200.
125. Saudi Center for Organ Transplantation. Annual Report for Organ Transplantation in Kingdom of Saudi Arabia 2019. 2019. [https://newscot.mosandah.com.sa/wp-content/uploads/2020/06/Report\\_Ar\\_F\\_9-Annual-Report-2019-En.pdf](https://newscot.mosandah.com.sa/wp-content/uploads/2020/06/Report_Ar_F_9-Annual-Report-2019-En.pdf) (accessed Jun 01, 2022).
126. Benjamin EJ, Muntner P, Alonso A, et al. Heart Disease and Stroke Statistics-2019 Update: A Report From the American Heart Association. *Circulation* 2019; **139**: e56–528.
127. Mozaffarian D, Benjamin EJ, Go AS, et al. Heart disease and stroke statistics-2015 update: A report from the American Heart Association. *Circulation* 2015; **131**: e29–322.



128. Alhazzani AA, Mahfouz AA, Abolyazid AY, et al. Study of Stroke Incidence in the Aseer Region, Southwestern Saudi Arabia. *Int J Environ Res Public Health* 2018; **15**: 215.
129. Singapore Health Promotion Board. Singapore Renal Registry Annual Report 2018. 2020. <https://www.nrdo.gov.sg/docs/librariesprovider3/default-document-library/singapore-renal-registry-annual-report-2018.pdf> (accessed Dec 01, 2022).
130. Singapore Health Promotion Board. Singapore Myocardial Infarction Registry Annual Report 2018. 2020. [https://www.nrdo.gov.sg/docs/librariesprovider3/default-document-library/smir-web-report-2018.pdf?sfvrsn=ccde799a\\_0](https://www.nrdo.gov.sg/docs/librariesprovider3/default-document-library/smir-web-report-2018.pdf?sfvrsn=ccde799a_0) (accessed Dec 01, 2022).
131. Park JI, Baek H, Jung HH. Prevalence of Chronic Kidney Disease in Korea: the Korean National Health and Nutritional Examination Survey 2011–2013. *J Korean Med Sci* 2016; **31**: 915–23.
132. Kim S, Lim CS, Han DC, et al. The prevalence of chronic kidney disease (CKD) and the associated factors to CKD in urban Korea: a population-based cross-sectional epidemiologic study. *J Korean Med Sci* 2009; **24**: S11–21.
133. Korean Society of Nephrology. Current renal replacement therapy in Korea. Insan Memorial Dialysis Registry 2018. [http://www.ksn.or.kr/rang\\_board/inc/download.php?nocount=1&code=sinchart\\_eng&num=2069](http://www.ksn.or.kr/rang_board/inc/download.php?nocount=1&code=sinchart_eng&num=2069) (accessed Nov 01, 2021).
134. Kim Y-S, Jin D-C. Global Dialysis Perspective: Korea. *Kidney360* 2020; **1**: 52–7.
135. Park S, Kim M, Kim JE, et al. Characteristics of kidney transplantation recipients over time in South Korea. *Korean J Int Med* 2020; **35**: 1457–67.
136. NHIS. Korea National Health Interview Survey 2018. 2018. <http://webcache.googleusercontent.com/search?q=cache:UN9mbgDSNNEJ:www.alio.go.kr/download.dn%3FfileNo%3D2430456+&cd=16&hl=en&ct=clnk&gl=sg> (accessed Nov 01, 2021).
137. Lee JH, Lim NK, Cho MC, Park HY. Epidemiology of Heart Failure in Korea: Present and Future. *Korean Circ J* 2016; **46**: 658–64.
138. Kim RB, Kim HS, Kang DR, et al. The Trend in Incidence and Case-fatality of Hospitalized Acute Myocardial Infarction Patients in Korea, 2007 to 2016. *J Korean Med Sci* 2019; **34**: e322.
139. Korea Disease Control Prevention Agency. Stroke Epidemiology Report. 2018. [http://www.cdc.go.kr/board/board.es?mid=a20602010000&bid=0034&list\\_no=365123&act=view](http://www.cdc.go.kr/board/board.es?mid=a20602010000&bid=0034&list_no=365123&act=view) (accessed Apr 01, 2022). [Korean]
140. Instituto Nacional de Estadística. Death risk by age. 2020. <https://www.ine.es/jaxiT3/Tabla.htm?t=27153> (accessed May 01, 2022).
141. Svenskt Njurregister. Svenskt njurregister årsrapport 2021. 2021. [https://www.medicinet.net/snr/rapporterdocs/SNR\\_arsrapport%202021\\_webversion.pdf](https://www.medicinet.net/snr/rapporterdocs/SNR_arsrapport%202021_webversion.pdf) (accessed Oct 01, 2022). [Swedish.]
142. Njurförbundet. Njurvårdsrapport 2020. 2021. <https://njurforbundet.se/wp-content/uploads/2020/08/Njurv%C3%A5rdsrapport2020.pdf> (accessed Oct 01, 2022). [Swedish.]
143. Kweon S, Kim Y, Jang MJ, et al. Data Resource Profile: The Korea National Health and Nutrition Examination Survey (KNHANES). *Int J Epidemiol* 2014; **43**(1): 69–77.
144. Taiwan Society of Nephrology, Annual report on kidney disease in Taiwan. 2019. [Data on file].
145. Lin CC, Liu CS, Li TC, Chen CC, Li CI, Lin WY. Microalbuminuria and the metabolic syndrome and its components in the Chinese population. *Eur J Clin Invest* 2007; **37**(10): 783–90.
146. Han JS, Lee MJ, Park KS, et al. Albuminuria as a Risk Factor for Anemia in Chronic Kidney Disease: Result from the KoreaN Cohort Study for Outcomes in Patients With Chronic Kidney Disease (KNOW-CKD). *PLoS One* 2015; **10**(10): e0139747.
147. Ministry of Health and Welfare, Statistics of chronic diseases in the population over 18 years of age (stratified by diseases). 2013. <https://dep.mohw.gov.tw/dos/cp-1720-7333-113.html> (accessed May 01, 2022).
148. Wang CL, Kuo CF, Yeh YH, Hsieh MY, Kuo CT, Chang SH. Familial aggregation of myocardial infarction and coaggregation of myocardial infarction and autoimmune disease: a nationwide population-based cross-sectional study in Taiwan. *BMJ Open* 2019; **9**(3): e023614.
149. Siqueira CADS, de Souza DLB. Reduction of mortality and predictions for acute myocardial infarction, stroke, and heart failure in Brazil until 2030. *Sci Rep* 2020; **10**(1): 17856.
150. Perkovic V, et al. High prevalence of chronic kidney disease in Thailand. *Kidney Int* 2008; **73**: 473–9.

151. Nephrology Society of Thailand. Thailand Renal Replacement Therapy. 2020. <https://www.nephrothai.org/wp-content/uploads/2021/10/Final-TRT-report-2020.pdf> (accessed May 01, 2022).
152. Süleymanlar G, Utaş C, Arinsoy T, et al. A population-based survey of Chronic RENal Disease in Turkey--the CREDIT study. *Nephrol Dial Transplant* 2011; **26**(6): 1862–71.
153. GHDx. Turkey Registry of Nephrology, Dialysis and Transplantation Renal Replacement Therapy Data 2014 – ERA-EDTA. 2021. <http://ghdx.healthdata.org/record/turkey-registry-nephrology-dialysis-and-transplantation-renal-replacement-therapy-data-2014>. (accessed Aug 01, 2022).
154. Díaz-Guzmán J, Bermejo-Pareja F, Benito-León J, et al. Prevalence of stroke and transient ischemic attack in three elderly populations of central Spain. *Neuroepidemiology* 2008; **30**(4): 247–53.
155. Centers for Disease Control and Prevention (CDC). National Health and Nutrition Examination Survey (NHANES). 2018. <https://www.cdc.gov/nchs/nhanes/index.htm> (accessed Jun 01, 2022).
156. Centers for Disease Control and Prevention (CDC). Health expenditures. 2021. <https://www.cdc.gov/nchs/fastats/health-expenditures.htm> (accessed May 26, 2022).

### Table S3 references

1. Australian Bureau of Statistics. Australian Health Survey 2011–2012. 2012. <https://www.abs.gov.au/statistics/health/health-conditions-and-risks/australian-health-survey-biomedical-results-chronic-diseases/latest-release#chronic-kidney-disease> (accessed Sep 10, 2021).
2. Australian Institute of Health and Welfare (AIHW). Chronic kidney disease prevalence among Australian adults over time. 2018. <https://www.aihw.gov.au/getmedia/cbfc53e4-c6fc-4a8e-9a7f-e5dfa38ae10c/aihw-cdk-6.pdf.aspx?inline=true> (accessed Sep 10, 2021).
3. Bikbov B, Purcell CA, Levey AS, et al. Global, regional, and national burden of chronic kidney disease, 1990–2017: a systematic analysis for the Global Burden of Disease Study 2017. *Lancet* 2020; **395**(10225): 709–33.
4. AIHW. Chronic kidney disease, What is chronic kidney disease? <https://www.aihw.gov.au/reports/chronic-kidney-disease/chronic-kidney-disease/contents/what-is-chronic-kidney-disease> (accessed Aug 31, 2021).
5. Conrad N, Judge A, Tran J, et al. Temporal trends and patterns in heart failure incidence: a population-based study of 4 million individuals. *Lancet* 2018; **391**(10120): 572–80.
6. Meisinger C, Döring A, Löwel H. Chronic kidney disease and risk of incident myocardial infarction and all-cause and cardiovascular disease mortality in middle-aged men and women from the general population. *Eur Heart J* 2006; **27**(10): 1245–50.
7. Weiner DE, Tighiouart H, Amin MG, et al. Chronic kidney disease as a risk factor for cardiovascular disease and all-cause mortality: a pooled analysis of community-based studies. *J Am Soc Nephrol* 2004; **15**(5): 1307–15.
8. The Heart Failure Policy Network. Heart failure policy and practice in Europe: Belgium. [www.hfpolicynetwork.org/](http://www.hfpolicynetwork.org/) (accessed Sep 9, 2021).
9. The World Bank. World Development Report 1993. 1993. <https://openknowledge.worldbank.org/handle/10986/5976> (accessed Sep 9, 2021).
10. Barreto SM, Ladeira RM, Duncan BB, et al. Chronic kidney disease among adult participants of the ELSA-Brazil cohort: association with race and socioeconomic position. *J Epidemiol Community Health* 2016; **70**(4): 380–9.
11. Piccolli AP, do Nascimento MM, Riella MC. Prevalence of chronic kidney disease in a population in southern Brazil (Pro-Renal Study). *J Bras Nefrol* 2017; **39**(4): 384–90.
12. de Souza W, de Abreu LC, da Silva LG, Bezerra IMP. Incidence of chronic kidney disease hospitalisations and mortality in Espírito Santo between 1996 to 2017. *PLoS One* 2019; **14**(11): e0224889.
13. Stevens B, Pezzullo L, Verdian L, Tomlinson J, George A, Bacal F. The Economic Burden of Heart Conditions in Brazil. *Arq Bras Cardiol* 2018; **111**(1): 29.
14. Bensenor IM, Goulart AC, Szwarzewald CL, Vieira MLFP, Malta DC, Lotufo PA. Prevalence of stroke and associated disability in Brazil: National Health Survey - 2013. *Arq Neuropsiquiatr* 2015; **73**(9): 746–50.
15. Arora P, Vasa P, Brenner D, et al. Prevalence estimates of chronic kidney disease in Canada: results of a nationally representative survey. *CMAJ* 2013; **185**(9): E417–23.
16. Bello AK, Ronksley PE, Tangri N, et al. Prevalence and Demographics of CKD in Canadian Primary Care Practices: A Cross-sectional Study. *Kidney Int Rep* 2019; **4**(4): 561–70.
17. Redfors B, Angerås O, Råmunddal T, et al. Trends in Gender Differences in Cardiac Care and Outcome After Acute Myocardial Infarction in Western Sweden: A Report From the Swedish Web System for

- Enhancement of Evidence-Based Care in Heart Disease Evaluated According to Recommended Therapies (SWEDEHEART). *J Am Heart Assoc* 2015; **4**(7): e001995.
18. Statista. Prevalence of diagnosed ischemic heart disease and acute myocardial infarction in Canada from 2000 to 2013. 2018. <https://www.statista.com/statistics/881873/diagnosed-heart-disease-prevalence-canada/> (accessed Sep 1, 2021).
  19. Mace-Brickman T, Eddeen AB, Carrero J-J, et al. The Risk of Stroke and Stroke Type in Patients With Atrial Fibrillation and Chronic Kidney Disease. *Can J Kidney Health Dis* 2019; **6**: 2054358119892372.
  20. Wang F, He K, Wang J, et al. Prevalence and Risk Factors for CKD: A Comparison Between the Adult Populations in China and the United States. *Kidney Int Rep* 2018; **3**(5): 1135–43.
  21. Zhang L, Wang F, Wang L, et al. Prevalence of chronic kidney disease in China: a cross-sectional survey. *Lancet* 2012; **379**(9818): 815–22.
  22. Zhang L, Zhao M-H, Zuo L, et al. China Kidney Disease Network (CK-NET) 2016 Annual Data Report. *Kidney Int Suppl* 2020; **10**(2): e97.
  23. Pradilla G, Pardo CA, Daza JS, Zúñiga A. Neuroepidemiología en Colombia: estudios en 16.032 individuos. *Acta Neurol Colomb* 1995; **11**: 129–33. [Spanish.]
  24. Thomsen RW, Nicolaisen SK, Hasvold P, et al. Elevated potassium levels in patients with chronic kidney disease: occurrence, risk factors and clinical outcomes—a Danish population-based cohort study. *Nephrol Dial Transplant* 2018; **33**(9): 1610–20.
  25. Kampmann JD, Goya Heaf J, Mogensen CB, Mickley H, Brandt F. Kidney Disease Cohort (KidDiCo) of Southern Denmark: Design, Coverage, Generalizability and Implications for Use. *Clin Epidemiol* 2021; **13**: 971–80.
  26. Vestergaard SV, Heide-Jørgensen U, Birn H, Christiansen CF. Effect of the Refitted Race-Free eGFR Formula on the CKD Prevalence and Mortality in the Danish Population. *Clin J Am Soc Nephrol* 2022; **17**(3): 426–8.
  27. Villain C, Metzger M, Combe C, et al. Prevalence of atheromatous and non-atheromatous cardiovascular disease by age in chronic kidney disease. *Nephrol Dial Transplant* 2020; **35**(5): 827–36.
  28. Brück K, Stel VS, Gambaro G, et al. CKD Prevalence Varies across the European General Population. *J Am Soc Nephrol* 2016; **27**(7): 2135–47.
  29. Bommer J. Prevalence and socio-economic aspects of chronic kidney disease. *Nephrol Dial Transplant* 2002; **17**(Suppl 11): 8–12.
  30. Beck H, Titze SI, Hübner S, et al. Heart Failure in a Cohort of Patients with Chronic Kidney Disease: The GCKD Study. *PLoS One* 2015; **10**(4): e0122552.
  31. Gößwald A, Schienkiewitz A, Nowossadeck E, Busch MA. [Prevalence of myocardial infarction and coronary heart disease in adults aged 40-79 years in Germany: results of the German Health Interview and Examination Survey for Adults (DEGS1)]. *Bundesgesundheitsblatt Gesundheitsforschung Gesundheitsschutz* 2013; **56**(5–6): 650–5. [German.]
  32. The Burden of Stroke in Germany: Stroke Alliance for Europe 2017. 2017. [https://www.safestroke.eu/wp-content/uploads/2017/12/SAFE\\_STROKE\\_GERMANY.pdf](https://www.safestroke.eu/wp-content/uploads/2017/12/SAFE_STROKE_GERMANY.pdf) (accessed Sep 10, 2021).
  33. Loutradis C, Tolika P, Skodra A, Avdelidou A, Sarafidis PA. Prevalence of Hyperkalemia in Diabetic and Non-Diabetic Patients with Chronic Kidney Disease: A Nested Case-Control Study. *Am J Nephrol* 2015; **42**(5): 351–60.
  34. National Health Insurance Fund Administration (NHIFA). Hungarian National Statistics. 2019. <https://www.ksh.hu/?lang=en> (accessed Apr 06, 2023).
  35. Singh A, Farag Y, Mittal B, et al. Epidemiology and risk factors of chronic kidney disease in India - results from the SEEK (Screening and Early Evaluation of Kidney Disease) study. *BMC Nephrol* 2013; **14**: 114.
  36. Huffman M, Prabhakaran D. Heart failure: Epidemiology and prevention in India. *National Med J India* 2010; **23**(5): 283.
  37. Pandian JD, Sudhan P. Stroke Epidemiology and Stroke Care Services in India. *J Stroke* 2013; **15**(3): 128.
  38. Ministry of Health Report 2013. [https://www.gov.il/BlobFolder/reports/health-2013/he/files\\_publications\\_units\\_ICDC\\_health2013.pdf](https://www.gov.il/BlobFolder/reports/health-2013/he/files_publications_units_ICDC_health2013.pdf) (accessed Nov 17, 2021).
  39. The Burden of Stroke in Israel: Stroke Alliance for Europe 2017. 2018 [https://www.safestroke.eu/wp-content/uploads/2017/12/SAFE\\_STROKE\\_ISRAEL.pdf](https://www.safestroke.eu/wp-content/uploads/2017/12/SAFE_STROKE_ISRAEL.pdf) (accessed Nov 17, 2021).
  40. de Nicola L, Donfrancesco C, Minutolo R, et al. Prevalence and cardiovascular risk profile of chronic kidney disease in Italy: results of the 2008–12 National Health Examination Survey. *Nephrol Dial Transplant* 2015; **30**(5): 806–14.
  41. Capuano V, Lamaida N, Borrelli MI, et al. [Chronic kidney disease prevalence and trends (1998-2008) in an area of southern Italy. The data of the VIP project]. *G Ital Nefrol* 2012; **29**(4): 445–51. [Italian.]
  42. Navarra S, Solini A, Baroni MG, Frova L, Grande E. A long-term nationwide study on chronic kidney disease-related mortality in Italy: trends and associated comorbidity. *J Nephrol* 2022; **35**(2): 505–15.

43. Barbieri MA, Rottura M, Cicala G, et al. Chronic Kidney Disease Management in General Practice: A Focus on Inappropriate Drugs Prescriptions. *J Clin Med* 2020; **9**(5): 1346.
44. Giampaoli S, Palmieri L, Donfrancesco C, Lo Noce C, Pilotto L, Vanuzzo D. Cardiovascular health in Italy. Ten-year surveillance of cardiovascular diseases and risk factors: Osservatorio Epidemiologico Cardiovascolare/Health Examination Survey. *Eur J Prev Cardiol* 2015; **22**(2 Suppl): 9–37.
45. The Burden of Stroke in Italy: Stroke Alliance for Europe 2017. 2018. [https://www.safestroke.eu/wp-content/uploads/2017/12/SAFE\\_STROKE\\_ITALY.pdf](https://www.safestroke.eu/wp-content/uploads/2017/12/SAFE_STROKE_ITALY.pdf) (accessed Sep 24, 2021).
46. Imai E, Horio M, Iseki K, et al. Prevalence of chronic kidney disease (CKD) in the Japanese general population predicted by the MDRD equation modified by a Japanese coefficient. *Clin Exp Nephrol* 2007; **11**(2): 156–63.
47. Nagata M, Ninomiya T, Doi Y, et al. Trends in the prevalence of chronic kidney disease and its risk factors in a general Japanese population: The Hisayama Study. *Nephrol Dial Transplant* 2010; **25**: 2557–64.
48. Takeuchi M, Shinkawa K, Yanagita M, Kawakami K. Prevalence, recognition and management of chronic kidney disease in Japan: population-based estimate using a healthcare database with routine health checkup data. *Clin Kidney J* 2021; **14**(10): 2197–202.
49. Tanaka K, Watanabe T, Takeuchi A, et al. Cardiovascular events and death in Japanese patients with chronic kidney disease. *Kidney Int* 2017; **91**(1): 227–34.
50. Ninomiya T, Perkovic V, de Galan BE, et al. Albuminuria and Kidney Function Independently Predict Cardiovascular and Renal Outcomes in Diabetes. *J Am Soc Nephrol* 2009; **20**(8): 1813–21.
51. Sundström J, Bodegard J, Bollmann A, et al. Prevalence, outcomes, and cost of chronic kidney disease in a contemporary population of 2.4 million patients from 11 countries: The CaReMe CKD study. *Lancet Reg Health Eur* 2022; **20**: 100438.
52. Morales DD, et al. National Nutrition and Health Survey (NNHeS): 2003–2004 cardiovascular disease-related results and implications. 2005. <https://www.herdin.ph/index.php/component/herdin/?view=research&cid=37903> (accessed Sep 10, 2021).
53. Tumanan-Mendoza BA, Mendoza VL, Santos AAAB, et al. Epidemiologic burden of hospitalisation for congestive heart failure among adults aged  $\geq 19$  years in the Philippines. *Heart Asia* 2017; **9**(1): 76–80.
54. Sy RG, Morales DD, Dans AL, et al. Prevalence of Atherosclerosis-Related Risk Factors and Diseases in the Philippines. *J Epidemiol* 2012; **22**(5): 440–7.
55. Puch-Walczak A, Bandosz P, Grodzicki T, et al. Prevalence of self-reported heart failure in the adult Polish population: results of the NATPOL 2011 study. *Pol Arch Intern Med* 2022; **132**(4): 16184.
56. The Burden of Stroke in Poland: Stroke Alliance for Europe 2017. 2018. [https://www.safestroke.eu/wp-content/uploads/2017/12/SAFE\\_STROKE\\_POLAND.pdf](https://www.safestroke.eu/wp-content/uploads/2017/12/SAFE_STROKE_POLAND.pdf) (accessed Jul 01, 2022).
57. AbuRuz ME, Alaloul F, Saifan A, Masa'Deh R, Abusalem S. Quality of Life for Saudi Patients With Heart Failure: A Cross-Sectional Correlational Study. *Glob J Health Sci* 2016; **8**(3): 49–58.
58. Memon I, Abu-Shaheen A, Heena H, Al-Tannir M. Point prevalence study for stroke in Saudi Arabia: A cross-sectional survey. *Saudi J Health Sci* 2019; **8**(2): 93–7.
59. Wong LY, Liew AST, Weng WT, Lim CK, Vathsala A, Toh MPHS. Projecting the Burden of Chronic Kidney Disease in a Developed Country and Its Implications on Public Health. *Int J Nephrol* 2018; **2018**: 5196285.
60. Picco L, Subramaniam M, Abdin E, Vaingankar JA, Chong SA. Prevalence and correlates of heart disease among adults in Singapore. *Asian J Psychiatr* 2016; **19**: 37–43.
61. Teh WL, Abdin E, Vaingankar JA, et al. Prevalence of stroke, risk factors, disability and care needs in older adults in Singapore: results from the WiSE study. *BMJ Open* 2018; **8**(3): e020285.
62. Lee M-J, Ha KH, Kim DJ, Park I. Trends in the Incidence, Prevalence, and Mortality of End-Stage Kidney Disease in South Korea. *Diabetes Metab J* 2020; **44**(6): 933–7.
63. Stroke Statistics in Korea 2018: A Report from the Epidemiology Research Council of the Korean Stroke Society. Korean Stroke Society 2018. [https://www.stroke.or.kr/bbs/skin/notice\\_popup/download.php?code=epidemic1&number=5305](https://www.stroke.or.kr/bbs/skin/notice_popup/download.php?code=epidemic1&number=5305) (accessed Oct 20, 2021).
64. Gorostidi M, Sánchez-Martínez M, Ruilope LM, et al. Chronic kidney disease in Spain: Prevalence and impact of accumulation of cardiovascular risk factors. *Nefrología (Engl Ed)* 2018; **38**(6): 606–15.
65. González AO, de Francisco A, Gayoso P, García F. Prevalence of chronic renal disease in Spain: Results of the EPIRCE study. *Nefrología* 2010; **30**(1): 78–86.
66. Martínez-Castelao A, Górriz JL, Portolés JM, et al. Baseline characteristics of patients with chronic kidney disease stage 3 and stage 4 in Spain: the MERENA observational cohort study. *BMC Nephrol* 2011; **12**: 53.
67. The Burden of Stroke in Spain: Stroke Alliance for Europe 2017. 2018. [https://www.safestroke.eu/wp-content/uploads/2017/12/SAFE\\_STROKE\\_SPAIN.pdf](https://www.safestroke.eu/wp-content/uploads/2017/12/SAFE_STROKE_SPAIN.pdf) (accessed Sep 29, 2021).
68. Lindmark K, et al. Epidemiology of heart failure and trends in diagnostic work-up: a retrospective, population-based cohort study in Sweden. *Clin Epidemiol* 2019; **11**: 231–44.

69. Statista. Number strokes in Sweden from 2010 to 2020. 2022. <https://www.statista.com/statistics/950406/number-strokes-in-sweden/> (accessed Feb 27, 2023).
70. Tsai M-H, Hsu C-Y, Lin M-Y, et al. Incidence, Prevalence, and Duration of Chronic Kidney Disease in Taiwan: Results from a Community-Based Screening Program of 106,094 Individuals. *Nephron* 2018; **140**(3): 175–84.
71. Lee W-C, Lee Y-T, Li L-C, et al. The Number of Comorbidities Predicts Renal Outcomes in Patients with Stage 3–5 Chronic Kidney Disease. *J Clin Med* 2018; **7**(12): 493.
72. Huang Z-S, Chiang T-L, Lee T-K. Stroke Prevalence in Taiwan. *Stroke* 1997; **28**(8): 1579–84.
73. Reyes EB, Ha J-W, Firdaus I, et al. Heart failure across Asia: Same healthcare burden but differences in organization of care. *Int J Cardiol* 2016; **223**:163–7
74. Sakboonyarat B, Rangsin R. Prevalence and associated factors of ischemic heart disease (IHD) among patients with diabetes mellitus: a nation-wide, cross-sectional survey. *BMC Cardiovasc Disord* 2018; **18**(1): 151.
75. Suwanwela NC. Stroke Epidemiology in Thailand. *J Stroke* 2014; **16**(1): 1–7.
76. Süleymanlar G, Utaç C, Arinsoy T, et al. A population-based survey of Chronic Renal Disease in Turkey—the CREDIT study. *Nephrol Dial Transplant* 2011; **26**(6): 1862–71.
77. Değertekin M, Erol Ç, Ergene O, et al. Türkiye'deki kalp yetersizliği prevalansı ve öngördürücüleri: HAPPY çalışması. *Türk Kardiyol Dern Arş* 2012; **40**(4): 298–308. [Turkish.]
78. Kılıç S, Aydın G, Çoner A, et al. Prevalence and clinical profile of patients with myocardial infarction with non-obstructive coronary arteries in Turkey (MINOCA-TR): A national multi-center, observational study. *Anatol J Cardiol* 2020. **23**(3): 176–182.
79. Börü ÜT, Kulualp AŞ, Tarhan ÖF, et al. Stroke prevalence among the Turkish population in a rural area of Istanbul: A community-based study. *SAGE Open Med* 2018; **6**: 2050312118797565.
80. Xie Y, Bowe B, Mokdad AH, et al., Analysis of the Global Burden of Disease study highlights the global, regional, and national trends of chronic kidney disease epidemiology from 1990 to 2016. *Kidney Int* 2018; **94**(3): 567–81.
81. Public Health England. Chronic Kidney Disease (CKD) prevalence model. 2014. [https://assets.publishing.service.gov.uk/government/uploads/system/uploads/attachment\\_data/file/612303/ChronicKidneyDiseaseCKDprevalencemodelbriefing.pdf](https://assets.publishing.service.gov.uk/government/uploads/system/uploads/attachment_data/file/612303/ChronicKidneyDiseaseCKDprevalencemodelbriefing.pdf) (accessed Jul 14, 2022).
82. Hounkpatin HO, Harris S, Fraser SDS, et al. Prevalence of chronic kidney disease in adults in England: comparison of nationally representative cross-sectional surveys from 2003 to 2016. *BMJ Open* 2020; **10**(8): e038423.
83. British Heart Foundation. Heart statistics - Cardiovascular Disease Statistics 2017. <https://www.bhf.org.uk/what-we-do/our-research/heart-statistics/heart-statistics-publications/cardiovascular-disease-statistics-2017> (accessed Aug 09, 2022).
84. Jayaraj JC, Davatyan K, Subramanian SS, Priya J. Epidemiology of Myocardial Infarction. 2019. <https://www.intechopen.com/chapters/59778> (accessed Sep 7, 2021).
85. Health Survey for England 2017 Cardiovascular diseases. 2018. [www.statisticsauthority.gov.uk/assessment/code-of-practice](http://www.statisticsauthority.gov.uk/assessment/code-of-practice) (accessed Sep 7, 2021).
86. United States Renal Data System. Chapter 1: CKD in the General Population. 2018. [https://www.usrds.org/media/1723/v1\\_c01\\_genpop\\_18\\_usrds.pdf](https://www.usrds.org/media/1723/v1_c01_genpop_18_usrds.pdf) (accessed Sep 24, 2021).
87. National Institute of Diabetes and Digestive and Kidney Diseases. Kidney Disease Statistics for the United States. 2015. <https://www.niddk.nih.gov/health-information/health-statistics/kidney-disease> (accessed Sep 10, 2021).
88. Bowe B, Xie Y, Li T, et al. Changes in the US Burden of Chronic Kidney Disease From 2002 to 2016: An Analysis of the Global Burden of Disease Study. *JAMA Netw Open* 2018; **1**(7): e184412.
89. Cheung AK, Sarnak MJ, Yan G, et al. Cardiac diseases in maintenance hemodialysis patients: Results of the HEMO Study. *Kidney Int* 2004; **65**(6): 2380–9.
90. Komanduri S, Jadhao Y, Guduru SS, Cheriya P, Wert Y. Prevalence and risk factors of heart failure in the USA: NHANES 2013 – 2014 epidemiological follow-up study. *J Community Hosp Intern Med Perspect* 2017; **7**(1): 15–20.
91. Bradley SM, Borgerding JA, Wood GB, Maynard C, Fihn SD. Incidence, risk factors, and outcomes associated with in-hospital acute myocardial infarction. *JAMA Netw Open* 2019; **2**(1): e187348.
92. Benjamin EJ, Virani SS, Callaway CW, et al. Heart Disease and Stroke Statistics–2018 Update: A Report From the American Heart Association. *Circulation* 2018; **137**(12): e67–492.
